# Supplementary material for: TiP-Leaf: a dataset of leaf traits across vegetation types on the Tibetan Plateau
Source: Copernicus journal article supplement (doi:10.5194/essd-15-25-2023), 2023-01-03
Supplement: Supplementary file 1 [file essd-15-25-2023-supplement.zip]

Archive with 2 entries (2 files):
- Supplement S1.xlsx
- essd-15-25-2023-supplement-title-page.pdf
