# Supplementary material for: TiP-Leaf: a dataset of leaf traits across vegetation types on the Tibetan Plateau
Source: Copernicus journal article supplement (doi:10.5194/essd-15-25-2023), 2023-01-03
Supplement: Supplementary file 1 [file essd-15-25-2023-supplement.zip › essd-15-25-2023-supplement-title-page.pdf]

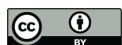

## *Supplement of*

# **TiP-Leaf: a dataset of leaf traits across vegetation types on the Tibetan Plateau**

**Yili Jin et al.**

*Correspondence to:* Jian Ni ([nijian@zjnu.edu.cn](mailto:nijian@zjnu.edu.cn))

- [essd-15-25-2023-supplement-title-page.pdf](#)
- [Supplement S1.xlsx](#)

The copyright of individual parts of the supplement might differ from the article licence.
