# Supplementary material for: TiP-Leaf: a dataset of leaf traits across vegetation types on the Tibetan Plateau
Source: Copernicus journal article supplement (doi:10.5194/essd-15-25-2023), 2023-01-03
Supplement: Supplementary file 1 [file essd-15-25-2023-supplement.zip › Supplement S1.xlsx]

## Sheet: variables
Heading	Description	Type
Site	Site number based on sampling time	Code
Lat	Latitude (decimal degrees)	Numeric
Lon	Longitude (decimal degrees)	Numeric
Elev	Elevation (m)	Integer
Animal intensity	Animal activity intensity	Character
Human intensity	Human interference intensity	Character
Vegetation type	Vegetation type from field survey	Character
Vegetation region	Vegetation region from vegetation map	Character
MAT	Mean annual temperature (°C)	Numeric
MTCO	Mean temperature of the coldest month	Numeric
MTWA	Mean temperature of the warmest month	Numeric
GDD0	Annual growing degree days above 0 °C	Numeric
GDD5	Annual growing degree days above 5 °C	Numeric
MAP	Mean annual precipitation (mm)	Numeric
GP	Growing season precipitation (mm)	Numeric
MI	Moisture index	Numeric
DI	Drought index	Numeric
soil type	soil type from Resource and Environment Science and Data Center	Numeric
Species	Scientific name	Character
Family	Botanical family	Character
Growth form	Trees, shrubs, semi-shrubs and herbs	Character
Life form	Deciduous and evergreen; Annual and perennial	Character
LT	Leaf thickness (mm)	Numeric
FW	Fresh weight (g)	Numeric
DW	Dry weight (g)	Numeric
LDMC	Leaf dry-matter content (g·g-1)	Numeric
LWC	Leaf water content (g·g-1)	Numeric
LA	Leaf area (cm2)	Numeric
SLA	Specific leaf area (cm2·g-1)	Numeric
LMA	Leaf mass per area (g·m-2)	Numeric
LCC	Leaf carbon concentration (mg·g-1)	Numeric
LNC	Leaf nitrogen concentration (mg·g-1)	Numeric
LPC	Leaf phosphorus concentration (mg·g-1)	Numeric

## Sheet: site information
Site	Lon	Lat	Elev	Animal intensity	Human intensity	Vegetation type	Vegetation region	MAT	MTCO	MTWA	GDD0	GDD5	MAP	GP	MI	DI	Soil type
TP2018071501	99.9245	35.8328	3794.33	Weak	Medium	Alpine shrubland	Middle TP Alpine Steppe Subregion	-1.44583	-13.8	9.3	1017.2	291.6	431.76	320.2	0.427579	0.452814	grass felt soil
TP2018071502	99.5492	35.6276	3937.33	Weak	Medium	Alpine meadow	Middle TP Alpine Steppe Subregion	-1.94417	-14	8.8	927.5	238.7	413.99	291.7	0.416033	0.469619	grass felt soil
TP2018071601	99.0256	35.1754	4308	Weak	Medium	Alpine meadow	Eastern TP Alpine Scrub and Alpine Meadow Subregion	-4.26667	-16	6.5	565.5	54.2	434	159	0.436116	0.449911	frigid calcareous soil
TP2018071602	98.5101	34.7819	4272	Weak	Medium	Alpine steppe	Eastern TP Alpine Scrub and Alpine Meadow Subregion	-3.51	-15.7	7.7	721.7	131	392.17	226.5	0.392349	0.503631	frigid calcareous soil
TP2018071701	97.7695	34.5412	4434.67	Weak	Weak	Alpine meadow	Eastern TP Alpine Scrub and Alpine Meadow Subregion	-4.55667	-17.1	6.9	603.7	73.3	409.88	177.6	0.4088	0.483602	frigid calcareous soil
TP2018071702	97.6234	34.5702	4331	Weak	Weak	Alpine meadow	Eastern TP Alpine Scrub and Alpine Meadow Subregion	-4.04833	-16.8	7.5	691.3	116.6	392.25	216.7	0.392256	0.503088	frigid calcareous soil
TP2018071801	97.6033	34.4093	4502.5	Weak	Weak	Alpine meadow	Eastern TP Alpine Scrub and Alpine Meadow Subregion	-4.71917	-17.3	6.7	583.8	63.1	429.84	168.1	0.433765	0.45297	grass felt soil
TP2018071802	97.8494	34.2562	4709	Weak	Weak	Alpine meadow	Eastern TP Alpine Scrub and Alpine Meadow Subregion	-5.80833	-18	5.3	408.2	2.8	481.56	49.2	0.491561	0.380728	grass felt soil
TP2018071901	98.1466	34.6672	4232.33	Medium	Weak	Alpine meadow	Eastern TP Alpine Scrub and Alpine Meadow Subregion	-3.11167	-15.6	8.3	814.6	184.6	370.51	257.6	0.36925	0.531489	frigid calcareous soil
TP2018071902	98.5531	34.3449	4214	Medium	Medium	Alpine shrubland	Eastern TP Alpine Scrub and Alpine Meadow Subregion	-2.79333	-15.1	8.4	835.8	191.5	430.48	260.3	0.441141	0.444251	frigid calcareous soil
TP2018071903	99.0246	34.0836	4136.67	Strong	Weak	Alpine shrubland	Eastern TP Alpine Scrub and Alpine Meadow Subregion	-2.21667	-14.2	8.7	899.2	223.1	485.99	276	0.445513	0.438672	grass felt soil
TP2018071904	99.0378	34.0155	4125	Medium	Weak	Alpine meadow	Eastern TP Alpine Scrub and Alpine Meadow Subregion	-2.43833	-14.4	8.4	854.4	196	499.66	260.7	0.461628	0.418375	grass felt soil
TP2018072001	99.5926	33.8903	4057.33	Weak	Weak	Alpine meadow	Eastern TP Alpine Scrub and Alpine Meadow Subregion	-1.6875	-13.5	8.9	962.1	255.4	540.61	295.2	0.496046	0.374976	grass felt soil
TP2018072101	99.9486	34.2423	4174.33	Medium	Weak	Alpine shrubland	Eastern TP Alpine Scrub and Alpine Meadow Subregion	-3.275	-14.9	7.1	678.7	93.3	563.37	198.9	0.521128	0.343411	grass felt soil
TP2018072102	100.4	34.1246	3963	Medium	Weak	Alpine shrubland	Eastern TP Alpine Scrub and Alpine Meadow Subregion	-1.45583	-13.3	8.9	980.5	259.5	571.17	297.3	0.518982	0.346107	grass felt soil
TP2018072201	99.5221	33.1103	4110.33	Weak	Weak	Alpine meadow	Eastern TP Alpine Scrub and Alpine Meadow Subregion	-2.77417	-13.7	7.1	695.8	97	642.19	199.7	0.573256	0.277664	grass felt soil
TP2018072202	99.5981	33.0903	4518	Medium	Weak	Alpine meadow	Eastern TP Alpine Scrub and Alpine Meadow Subregion	-2.8675	-13.8	7	678.3	87.9	650	194.2	0.570842	0.280702	grass felt soil
TP2018072203	99.5545	32.9034	4120	Medium	Weak	Alpine meadow	Eastern TP Alpine Scrub and Alpine Meadow Subregion	-1.2325	-12.2	8.6	946.7	233.2	635.36	283	0.528759	0.333703	grass felt soil
TP2018072301	100.48	33.3295	4150	Weak	Weak	Alpine shrubland	Eastern TP Alpine Scrub and Alpine Meadow Subregion	-2.19417	-13.1	7.6	778.3	136.6	680.02	227.4	0.618154	0.221129	grass felt soil
TP2018072401	99.237	33.6769	4140.33	Strong	Weak	Alpine meadow	Eastern TP Alpine Scrub and Alpine Meadow Subregion	-1.91667	-13.6	8.7	914.2	226.9	544.54	277.1	0.487152	0.386177	grass felt soil
TP2018072402	98.8806	33.5786	4396.67	Strong	Strong	Alpine shrubland	Eastern TP Alpine Scrub and Alpine Meadow Subregion	-3.0275	-14.5	7.4	715.2	114.8	557.8	213.9	0.506621	0.361661	grass felt soil
TP2018072403	98.7659	33.4545	4575.33	Strong	Medium	Alpine meadow	Eastern TP Alpine Scrub and Alpine Meadow Subregion	-3.96417	-15.1	6.3	550.1	38.3	587.01	139.6	0.540985	0.31837	grass felt soil
TP2018072501	98.0761	32.6198	4135	Strong	Strong	Alpine shrubland	Eastern TP Alpine Scrub and Alpine Meadow Subregion	-3.22167	-12.4	5.4	483.2	5.7	657.73	68.8	0.579473	0.26979	grass felt soil
TP2018072502	98.0436	32.6449	4514	Weak	Weak	Alpine shrubland	Eastern TP Alpine Scrub and Alpine Meadow Subregion	-3.94083	-13	4.7	383.4	0	668.96	0	0.57798	0.271761	grass felt soil
TP2018072601	98.6583	32.8828	3919.33	Medium	Weak	Alpine meadow	Eastern TP Alpine Scrub and Alpine Meadow Subregion	0.0266668	-10.7	9.7	1157.6	365.7	579.12	333.9	0.47624	0.398824	dark felty soil
TP2018072602	98.7158	32.8514	3956.5	Medium	Weak	Alpine shrubland	Eastern TP Alpine Scrub and Alpine Meadow Subregion	-0.0383332	-10.6	9.6	1138.4	351.6	586.01	327.7	0.482395	0.391189	dark felty soil
TP2018072603	99.0159	32.8661	3977	Weak	Weak	Alpine shrubland	Eastern TP Alpine Scrub and Alpine Meadow Subregion	-0.701667	-11.4	8.9	1018.3	275.1	607.17	300.8	0.488594	0.3836	dark felty soil
TP2018072604	98.5096	32.7718	3965	Strong	Strong	Alpine meadow	Eastern TP Alpine Scrub and Alpine Meadow Subregion	0.654167	-9.8	10.2	1256.9	427.6	577.55	353.8	0.468219	0.40705	bog soil
TP2018072701	98.5563	33.0826	4055.5	Medium	Weak	Alpine shrubland	Eastern TP Alpine Scrub and Alpine Meadow Subregion	-0.38	-11.5	9.7	1122.2	349.6	556.87	326.1	0.492324	0.379647	dark felty soil
TP2018072702	98.4797	33.4718	4499.67	Strong	Strong	Alpine meadow	Eastern TP Alpine Scrub and Alpine Meadow Subregion	-2.86333	-14.3	7.6	738.2	126.4	548.56	219.4	0.498131	0.372364	grass felt soil
TP2018072801	98.0431	32.9947	4408.67	Medium	Weak	Alpine meadow	Eastern TP Alpine Scrub and Alpine Meadow Subregion	-0.365834	-11.1	9.5	1096.8	331.3	556.22	322	0.470274	0.406945	grass felt soil
TP2018072802	98.0162	33.4132	4154.67	Strong	Medium	Alpine meadow	Eastern TP Alpine Scrub and Alpine Meadow Subregion	-1.56333	-13.2	9	967.9	261	518.74	297.3	0.461739	0.418161	bog soil
TP2018072803	97.7537	33.5063	4240.5	Medium	Medium	Alpine shrubland	Eastern TP Alpine Scrub and Alpine Meadow Subregion	-1.69583	-13.5	9	965.5	261.5	505.08	297.4	0.47201	0.405202	meadow soil
TP2018073001	97.4589	33.1153	4120.33	Weak	Weak	Alpine shrubland	Eastern TP Alpine Scrub and Alpine Meadow Subregion	-1.73333	-12.1	8	833.9	170.8	571.25	255.6	0.514935	0.349986	dark felty soil
TP2018073002	97.2748	33.4493	4314.67	Strong	Medium	Alpine meadow	Eastern TP Alpine Scrub and Alpine Meadow Subregion	-1.50583	-13	9	976.6	266.3	514.66	303.8	0.475085	0.399539	bog soil
TP2018073003	97.0256	33.7762	4578.5	Strong	Medium	Alpine meadow	Eastern TP Alpine Scrub and Alpine Meadow Subregion	-4.44917	-16.4	6.4	563.4	47.3	525.5	153.7	0.510506	0.356623	grass felt soil
TP2018073101	97.1768	34.2268	4461	Strong	Strong	Alpine meadow	Eastern TP Alpine Scrub and Alpine Meadow Subregion	-4.9325	-17.5	6.4	552.2	47.9	459.6	152.9	0.462461	0.416841	grass felt soil
TP2018073102	96.8248	34.4093	4520	Medium	Strong	Alpine meadow	Eastern TP Alpine Scrub and Alpine Meadow Subregion	-4.76583	-17.3	6.7	573.9	58.8	430.25	166.4	0.435316	0.447186	grass felt soil
TP2018073103	96.3205	34.0114	4199.33	Strong	Strong	Alpine meadow	Eastern TP Alpine Scrub and Alpine Meadow Subregion	-2.4225	-14.4	8.6	879.1	217.3	440.82	279.4	0.431322	0.446184	meadow soil
TP2018080101	95.7123	34.5312	4365.33	Strong	Strong	Alpine meadow	Eastern TP Alpine Scrub and Alpine Meadow Subregion	-3.17083	-15	8	762.1	155.2	376.24	243.1	0.371732	0.512183	meadow soil
TP2018080102	95.9696	34.5696	4495	Strong	Strong	Alpine meadow	Eastern TP Alpine Scrub and Alpine Meadow Subregion	-3.9425	-15.8	7.3	653.5	97.7	391.51	204.2	0.40599	0.474739	grass felt soil
TP2018080103	96.1392	34.7229	4584.33	Strong	Medium	Alpine meadow	Eastern TP Alpine Scrub and Alpine Meadow Subregion	-4.4875	-16.6	6.8	590.2	68.8	382.71	178.6	0.399573	0.484277	grass felt soil
TP2018080201	94.9766	34.878	4272.33	Medium	Strong	Alpine steppe	Eastern TP Alpine Scrub and Alpine Meadow Subregion	-2.37667	-14.2	8.9	895.7	237.6	298.38	292.7	0.292793	0.599506	meadow soil
TP2018080202	95.1775	34.9229	4741.75	Strong	Medium	Alpine meadow	Eastern TP Alpine Scrub and Alpine Meadow Subregion	-5.25	-16.7	5.8	451.8	17.3	366.85	113.9	0.396149	0.483027	grass felt soil
TP2018080203	95.7868	34.2086	4443.33	Strong	Medium	Alpine meadow	Eastern TP Alpine Scrub and Alpine Meadow Subregion	-3.05833	-14.6	7.9	753.7	147.6	425.92	239.5	0.41195	0.464448	grass felt soil
TP2018080301	95.4943	33.8254	4305.67	Medium	Medium	Alpine meadow	Eastern TP Alpine Scrub and Alpine Meadow Subregion	-1.52667	-12.9	9.2	978.3	279	443.8	306.4	0.435663	0.435064	meadow soil
TP2018080302	95.0324	34.1604	4631.67	Medium	Medium	Alpine meadow	Eastern TP Alpine Scrub and Alpine Meadow Subregion	-3.715	-14.9	7	631.6	85.9	424.16	189.7	0.409486	0.464967	grass felt soil
TP2018080303	94.8926	34.2713	4548.33	Strong	Strong	Alpine meadow	Eastern TP Alpine Scrub and Alpine Meadow Subregion	-3.2925	-14.6	7.6	705.3	123.9	394.13	225	0.400691	0.475153	bog soil
TP2018080401	95.9837	33.6126	4153	Strong	Strong	Alpine meadow	Eastern TP Alpine Scrub and Alpine Meadow Subregion	-2.28	-13.4	8.1	823.2	178.7	503.34	261.5	0.43292	0.439666	grass felt soil
TP2018080402	96.4961	33.2184	4174.67	Strong	Strong	Alpine meadow	Eastern TP Alpine Scrub and Alpine Meadow Subregion	-0.311667	-11	9.7	1113.8	348.8	529.6	343.2	0.463569	0.404177	lakes and reservoirs
TP2018080403	95.2878	33.6308	4555.33	Medium	Medium	Alpine meadow	Eastern TP Alpine Scrub and Alpine Meadow Subregion	-3.38917	-14.3	7	641.1	85	503.32	192.4	0.468169	0.396233	grass felt soil
TP2018080404	95.1293	33.538	4822.67	Medium	Medium	Alpine meadow	Eastern TP Alpine Scrub and Alpine Meadow Subregion	-4.48167	-15.2	5.7	471.4	16.7	531.5	112	0.504938	0.352178	grass felt soil
TP2018080405	95.166	33.0838	4223	Medium	Medium	Alpine shrubland	Eastern TP Alpine Scrub and Alpine Meadow Subregion	-1.665	-12.6	8.4	888.9	216.1	541.55	281.9	0.508149	0.348467	grass felt soil
TP2018080501	95.5214	32.8558	4005.5	Medium	Medium	Coniferous forest	Eastern TP Alpine Scrub and Alpine Meadow Subregion	1.2075	-9.8	11.3	1420.7	560	534.81	411.5	0.454514	0.413285	grass felt soil
TP2018080502	96.1262	32.9621	4256.67	Strong	Strong	Alpine meadow	Eastern TP Alpine Scrub and Alpine Meadow Subregion	-0.0149995	-10.5	9.7	1138.1	361.4	555.33	351.4	0.478386	0.383965	grass felt soil
TP2018080503	96.5629	32.5915	3937.67	Medium	Strong	Alpine meadow	Subtropical Broadleaf Evergreen Forest Region	2.84917	-7.2	12.1	1685.7	722.3	544.07	469.2	0.445224	0.419408	dark felty soil
TP2018080601	97.3251	32.7676	4049.5	Weak	Weak	Alpine shrubland	Eastern TP Alpine Scrub and Alpine Meadow Subregion	0.4125	-9.3	9.6	1149	354.5	575.07	344.4	0.467585	0.400515	grass felt soil
TP2018080701	96.5124	32.2882	3781	Weak	Weak	Coniferous forest	Subtropical Broadleaf Evergreen Forest Region	2.0575	-7.7	11	1472.6	565	587.23	425.1	0.453041	0.408571	grass felt soil
TP2018080702	96.8594	32.2467	3692.67	Weak	Weak	Alpine meadow	Subtropical Broadleaf Evergreen Forest Region	4.27917	-5.6	13.3	2000.2	935.3	544.78	525.7	0.439598	0.425291	dark felty soil
TP2018080703	97.0619	32.0194	3551	Weak	Weak	Coniferous forest	Subtropical Broadleaf Evergreen Forest Region	4.81583	-4.8	13.6	2119.4	1014.8	547.4	539.9	0.418886	0.450709	gray cinnamon soil
TP2018080801	97.7165	31.8109	3923.33	Strong	Weak	Alpine meadow	Subtropical Broadleaf Evergreen Forest Region	3.2	-5.5	11.3	1638.2	646.9	593.76	439.9	0.44604	0.418547	meadow soil
TP2018080802	98.1458	31.4205	3728.33	Weak	Weak	Alpine meadow	Subtropical Broadleaf Evergreen Forest Region	-4.27083	-11	2.4	162.8	0	771.14	0	0.628889	0.201939	gray cinnamon soil
TP2018080803	98.0187	31.3156	4051	Medium	Weak	Alpine meadow	Subtropical Broadleaf Evergreen Forest Region	0.5125	-7.1	7.8	963.8	195.9	655.55	290.2	0.493226	0.360112	dark felty soil
TP2018080901	97.0282	31.1888	3455	Weak	Medium	Alpine shrubland	Subtropical Broadleaf Evergreen Forest Region	4.39	-4.9	12.8	1982.1	910.6	550.4	514.5	0.386043	0.493337	cinnamon soil
TP2018080902	96.7455	31.1264	3772	Weak	Weak	Coniferous forest	Subtropical Broadleaf Evergreen Forest Region	3.3075	-6.3	12	1744.4	749.9	570.53	469.9	0.423863	0.451642	gray cinnamon soil
TP2018081001	96.4973	31.1168	4462	Medium	Medium	Alpine shrubland	Subtropical Broadleaf Evergreen Forest Region	-1.66083	-10.6	6.6	702.2	77.1	661.76	204.9	0.542355	0.30853	dark felty soil
TP2018081002	95.6564	31.3942	3971	Weak	Strong	Alpine meadow	Subtropical Broadleaf Evergreen Forest Region	4.2075	-5.5	13.2	1979.9	934.8	591.97	520.7	0.473148	0.39707	dark felty soil
TP2018081003	95.6499	31.3965	3952	Weak	Strong	Alpine meadow (Agricultural vegetation)	Subtropical Broadleaf Evergreen Forest Region	3.87	-5.8	12.9	1893.1	870.9	603.36	503.8	0.473768	0.396353	dark felty soil
TP2018081101	95.3505	31.5118	4317.33	Weak	Weak	Alpine meadow	Subtropical Broadleaf Evergreen Forest Region	-0.0124998	-9.1	8.7	1021.3	272.4	644.59	315	0.525638	0.33103	dark felty soil
TP2018081102	94.8579	31.6701	4351.5	Weak	Weak	Alpine shrubland	Eastern TP Alpine Scrub and Alpine Meadow Subregion	0.3525	-9.2	9.4	1133	351.2	612.84	339.6	0.505058	0.355388	dark felty soil
TP2018081201	94.1186	31.9406	4207.67	Weak	Weak	Alpine meadow	Eastern TP Alpine Scrub and Alpine Meadow Subregion	0.0175	-10.3	9.6	1144.6	372.1	550.44	345.1	0.48379	0.377673	dark felty soil
TP2018081202	94.4857	32.4149	4755.67	Medium	Strong	Alpine meadow	Eastern TP Alpine Scrub and Alpine Meadow Subregion	-2.79583	-13	6.8	660.8	84.5	585.65	198.9	0.517891	0.336353	grass felt soil
TP2018081203	93.8428	31.9139	4064.67	Medium	Medium	Alpine meadow	Eastern TP Alpine Scrub and Alpine Meadow Subregion	1.88	-8.9	11.8	1557.5	663	502.01	439	0.419892	0.454305	dark felty soil
TP2018081301	93.5822	32.1049	4113.33	Medium	Medium	Alpine meadow	Eastern TP Alpine Scrub and Alpine Meadow Subregion	0.836666	-10.2	11	1373.8	540.3	482.97	402.2	0.422504	0.448905	dark felty soil
TP2018081302	93.0718	32.1397	4401.33	Weak	Strong	Alpine meadow	Eastern TP Alpine Scrub and Alpine Meadow Subregion	-0.568333	-11.7	9.8	1133.3	380.6	468.19	351.5	0.4098	0.461828	grass felt soil
TP2018081303	92.4784	32.1891	4761.67	Strong	Strong	Alpine meadow	Eastern TP Alpine Scrub and Alpine Meadow Subregion	-2.81583	-14	7.7	775.8	156.3	465.2	255.2	0.431358	0.433155	grass felt soil
TP2018081401	92.0649	31.7217	4651.33	Strong	Strong	Alpine meadow	Eastern TP Alpine Scrub and Alpine Meadow Subregion	-2.09917	-13.1	8.1	867.5	206.3	466.86	286	0.423722	0.440969	grass felt soil
TP2018081402	91.9039	31.5742	4652.67	Medium	Strong	Alpine meadow	Eastern TP Alpine Scrub and Alpine Meadow Subregion	-1.49417	-12.6	8.7	963	264.6	461.06	318.9	0.414417	0.451074	grass felt soil
TP2018081501	91.8322	32.4796	4872	Medium	Strong	Alpine steppe	Eastern TP Alpine Scrub and Alpine Meadow Subregion	-4.0625	-15.6	6.8	632.9	81.8	433.08	205.5	0.4083	0.456264	grass felt soil
TP2018081502	92.0534	33.6425	4705.67	Medium	Medium	Alpine meadow	Middle TP Alpine Steppe Subregion	-4.18167	-16.4	7.4	687.6	120	345.58	233.4	0.36728	0.503574	bog soil
TP2018081503	92.4064	34.1776	4603.33	Medium	Medium	Alpine meadow	Middle TP Alpine Steppe Subregion	-4.07417	-16.3	7.6	704.3	130.7	308.8	240.1	0.315349	0.563219	frigid calcareous soil
TP2018081601	93.5296	34.1594	4519.67	Weak	Strong	Alpine meadow	Eastern TP Alpine Scrub and Alpine Meadow Subregion	-3.27667	-14.8	7.8	741.6	146.7	348.65	238.8	0.348752	0.531482	grass felt soil
TP2018081602	93.1076	34.1595	4560	Weak	Strong	Alpine steppe	Middle TP Alpine Steppe Subregion	-4.18667	-15.8	7	627.4	87.9	348	193.2	0.365988	0.509939	grass felt soil
TP2018081701	92.8867	34.6374	4758.67	Weak	Strong	Alpine steppe	Middle TP Alpine Steppe Subregion	-5.455	-16.9	5.7	455.7	19	329.7	116.1	0.344848	0.533868	frigid calcareous soil
TP2018081702	93.3233	35.3275	4530	Strong	Strong	Alpine steppe	Middle TP Alpine Steppe Subregion	-4.4025	-15.9	6.8	590	72.7	269.73	176.1	0.283148	0.606848	frigid calcareous soil
TP2018081703	94.1714	35.0675	4455	Medium	Medium	Alpine meadow	Middle TP Alpine Steppe Subregion	-3.34583	-14.9	7.8	734.6	144.7	282.61	236.7	0.286234	0.604861	frigid calcareous soil
TP2018081704	94.3362	35.7733	4063.67	Medium	Medium	Alpine steppe	Middle TP Alpine Steppe Subregion	-1.39833	-13.9	10.4	1120.8	393.5	179.55	370.2	0.197916	0.699716	frigid calcareous soil
TP2019070701	93.0336	35.1098	4720	Medium	Medium	Alpine meadow	Middle TP Alpine Steppe Subregion	-5.3925	-16.6	5.7	450.5	18	305.73	115.4	0.324596	0.558998	frigid calcareous soil
TP2019070801	91.851	33.2555	4862.67	Medium	Medium	Alpine meadow	Middle TP Alpine Steppe Subregion	-4.47083	-16.5	6.9	628.2	86	377.55	201.3	0.408348	0.455378	grass felt soil
TP2019070901	91.5221	32.2032	4618	Medium	Strong	Alpine steppe	Eastern TP Alpine Scrub and Alpine Meadow Subregion	-2.14667	-13.9	8.7	930.9	255.7	407.44	311.8	0.379795	0.487997	frigid calcareous soil
TP2019070902	90.6247	31.8791	4708.5	Weak	Medium	Alpine steppe	Middle TP Alpine Steppe Subregion	-1.99417	-13.4	8.4	909.2	232.7	407.85	311.8	0.380478	0.47863	frigid calcareous soil
TP2019071001	90.2811	31.1603	4673	Medium	Medium	Alpine steppe	Middle TP Alpine Steppe Subregion	-4.1525	-14.1	5	447.5	0	491.74	0	0.466764	0.371685	grass felt soil
TP2019071002	90.9609	31.386	4571.5	Strong	Weak	Alpine meadow	Middle TP Alpine Steppe Subregion	-0.889167	-12	9.1	1060.3	323.2	437.71	353.8	0.397831	0.461823	frigid calcareous soil
TP2019071101	90.1867	31.0118	4728.5	Strong	Weak	Alpine meadow	Middle TP Alpine Steppe Subregion	-1.40333	-11.6	7.8	874	186.6	452.64	302.4	0.414453	0.431351	grass felt soil
TP2019071102	90.1898	31.4634	4699	Medium	Medium	Alpine steppe	Middle TP Alpine Steppe Subregion	-1.235	-12.1	8.6	973.3	262	417.63	336.6	0.384273	0.468158	meadow soil
TP2019071103	90.1797	31.454	4672	Weak	Weak	Alpine steppe	Middle TP Alpine Steppe Subregion	-1.09167	-11.9	8.7	998.8	278.2	415.75	343.6	0.38092	0.471691	frigid calcareous soil
TP2019071201	89.478	31.6287	4647	Weak	Medium	Alpine steppe	Middle TP Alpine Steppe Subregion	-0.490833	-11.2	9.3	1100.3	344.5	381.61	373.8	0.349075	0.501726	frigid calcareous soil
TP2019071202	89.1421	32.2253	4695.33	Medium	Weak	Alpine steppe	Middle TP Alpine Steppe Subregion	-1.44417	-12.5	8.9	989.6	283.3	347.57	345.6	0.325087	0.529653	frigid calcareous soil
TP2019071203	88.9418	32.5124	4990.67	Medium	Medium	Alpine meadow	Middle TP Alpine Steppe Subregion	-3.35917	-14.4	7.1	689.2	104.1	356.97	234.9	0.344065	0.508347	frigid calcareous soil
TP2019071301	88.4917	33.3444	4932	Medium	Weak	Alpine steppe	Middle TP Alpine Steppe Subregion	-4.16	-15.8	7.1	643.5	90.4	310.35	221.8	0.310201	0.548801	frigid calcareous soil
TP2019071302	88.5306	33.3567	5148.5	Medium	Weak	Alpine steppe	Middle TP Alpine Steppe Subregion	-4.8425	-16.4	6.3	542.5	41.5	322.73	167.4	0.326354	0.530851	frigid calcareous soil
TP2019071401	88.6042	32.114	4596	Strong	Strong	Alpine steppe	Middle TP Alpine Steppe Subregion	-0.2025	-11.1	10.1	1198	422.3	324.64	403.9	0.301887	0.552691	frigid calcareous soil
TP2019071501	87.5882	31.4731	4745	Medium	Medium	Alpine steppe	Middle TP Alpine Steppe Subregion	0.4	-9.6	10	1227.9	432.4	325.81	418	0.297278	0.553753	frigid calcareous soil
TP2019071502	88.1714	31.1745	4657	Medium	Medium	Alpine steppe	Middle TP Alpine Steppe Subregion	1.3425	-8.4	10.4	1370	515.4	352.69	450.8	0.317376	0.528679	frigid calcareous soil
TP2019071503	88.2092	31.0687	4675.33	Medium	Medium	Alpine meadow	Middle TP Alpine Steppe Subregion	1.26083	-8.3	10.2	1334.4	485.9	362.2	444.4	0.321684	0.523152	frigid calcareous soil
TP2019071601	88.7555	31.474	5003	Medium	Medium	Alpine meadow	Middle TP Alpine Steppe Subregion	0.869166	-9.4	10.4	1324	491.4	356.97	436.9	0.319801	0.529228	meadow soil
TP2019071602	88.8442	31.4808	4592	Strong	Strong	Alpine steppe	Middle TP Alpine Steppe Subregion	0.594167	-9.7	10.1	1270.1	454.1	362.68	421.7	0.323646	0.525578	frigid calcareous soil
TP2019071701	87.2137	31.3668	4868	Strong	Strong	Alpine steppe	Middle TP Alpine Steppe Subregion	0.388333	-9.6	10.1	1223.5	432	317.05	419.1	0.298542	0.553258	frigid calcareous soil
TP2019071702	86.79	30.8844	4926.67	Strong	Strong	Alpine meadow	Middle TP Alpine Steppe Subregion	0.0116668	-9.4	9.3	1105.9	346.7	327.85	387.4	0.303795	0.550351	frigid calcareous soil
TP2019071801	87.7999	31.9985	4633.33	Strong	Strong	Alpine steppe	Middle TP Alpine Steppe Subregion	-0.1	-10.7	10.1	1198.2	423.2	309.46	408.4	0.285143	0.569247	frigid calcareous soil
TP2019071802	88.0789	32.4859	4803.67	Medium	Medium	Alpine steppe	Middle TP Alpine Steppe Subregion	-1.68	-12.7	8.9	961.6	270.1	312.27	346.8	0.299893	0.555469	frigid calcareous soil
TP2019071803	87.5526	32.0293	5047	Weak	Weak	Alpine steppe	Middle TP Alpine Steppe Subregion	-1.265	-11.7	8.9	982.9	278.6	318.82	355	0.305212	0.547037	frigid calcareous soil
TP2019071901	86.9297	32.062	4582	Medium	Medium	Alpine steppe	Middle TP Alpine Steppe Subregion	0.1275	-10.8	10.8	1276.9	490.9	272.55	428.8	0.255119	0.604341	frigid calcareous soil
TP2019071902	86.649	32.3694	4587.33	Medium	Medium	Alpine steppe	Middle TP Alpine Steppe Subregion	-0.155	-11.4	11	1267.8	494.1	252.55	428.3	0.24153	0.620611	frigid calcareous soil
TP2019071903	86.558	32.578	4799	Medium	Medium	Alpine steppe	Middle TP Alpine Steppe Subregion	-1.63167	-12.9	9.6	1014.7	321.2	262.72	365	0.25572	0.605674	frigid calcareous soil
TP2019071904	86.4187	31.9221	4714	Medium	Medium	Alpine steppe	Middle TP Alpine Steppe Subregion	-0.2425	-11.1	10.6	1209.5	448.8	266.2	412.1	0.254272	0.607193	frigid calcareous soil
TP2019072001	86.7625	31.7639	4659	Medium	Medium	Alpine steppe	Middle TP Alpine Steppe Subregion	0.0608335	-10.5	10.5	1232	455.4	282.83	416.5	0.262181	0.596774	frigid calcareous soil
TP2019072002	86.0418	31.5169	4925	Medium	Medium	Alpine shrubland	Middle TP Alpine Steppe Subregion	-0.858333	-11.2	9.7	1061.5	344.8	279.92	375.2	0.290967	0.570051	frigid calcareous soil
TP2019072101	85.0789	31.2078	4855.67	Medium	Medium	Alpine meadow	Middle TP Alpine Steppe Subregion	-1.41333	-11.7	9.3	970	292.7	264.39	350.6	0.249196	0.627784	frigid calcareous soil
TP2019072102	85.1368	31.7548	4932.5	Medium	Medium	Alpine steppe	Middle TP Alpine Steppe Subregion	-2.315	-13.1	9	883	243.4	255.42	328.5	0.261467	0.607794	frigid calcareous soil
TP2019072103	84.5885	32.1831	4514.5	Medium	Medium	Alpine steppe	Middle TP Alpine Steppe Subregion	-0.2925	-12.2	12	1320.4	562.2	188.66	441.7	0.187944	0.68169	frigid calcareous soil
TP2019072201	85.5159	32.0119	4948.33	Medium	Strong	Alpine steppe	Middle TP Alpine Steppe Subregion	-1.91583	-12.9	9.4	959.6	292.5	253.28	348.2	0.246892	0.619424	frigid calcareous soil
TP2019072301	85.1695	30.5078	4854	Medium	Medium	Alpine steppe	Middle TP Alpine Steppe Subregion	-0.92	-10.2	8.8	951.6	263.9	298.8	337.2	0.279484	0.60813	frigid calcareous soil
TP2019072302	85.5452	30.0785	5343	Medium	Medium	Alpine meadow	Middle TP Alpine Steppe Subregion	-3.31583	-11.5	5.4	486	4.8	372.77	74.5	0.36624	0.512062	grass felt soil
TP2019072303	85.6273	29.4293	5061.33	Medium	Medium	Alpine meadow	Middle TP Alpine Steppe Subregion	-1.60833	-9.3	6.4	667.6	67	391.22	220.7	0.360846	0.53405	meadow soil
TP2019072401	86.1462	29.4413	4890	Medium	Medium	Alpine meadow	Middle TP Alpine Steppe Subregion	-0.721667	-8.8	7.4	841.7	161.4	378.38	302.6	0.343661	0.537254	grass felt soil
TP2019072402	86.8498	29.3975	4624	Medium	Medium	Alpine shrubland	Middle TP Alpine Steppe Subregion	2.38083	-6.5	10.7	1490.8	584.4	338.75	478.4	0.308624	0.549584	grass felt soil
TP2019072601	87.4633	28.9808	4998	Medium	Medium	Alpine meadow	Middle TP Alpine Steppe Subregion	1.15917	-7.1	8.9	1164.9	337.6	390.48	406.2	0.349551	0.494309	grass felt soil
TP2019072602	86.7953	28.5925	4369	Medium	Medium	Alpine steppe	Middle TP Alpine Steppe Subregion	2.76167	-6.3	11.2	1582.8	649.3	343.72	495.3	0.302296	0.575248	cold calcareous soil
TP2019072603	86.0504	28.6359	4473.33	Weak	Weak	Alpine steppe	Middle TP Alpine Steppe Subregion	-0.408333	-7.6	6.9	793.6	122	439.55	271.7	0.380072	0.520939	frigid calcareous soil
TP2019072701	85.4754	28.9119	4802	Medium	Medium	Alpine desert	Middle TP Alpine Steppe Subregion	-1.0025	-8	6.4	687.9	70.2	433.58	225.7	0.377384	0.524881	frigid calcareous soil
TP2019072702	87.537	28.5211	4181	Medium	Medium	Alpine desert	Middle TP Alpine Steppe Subregion	4.96167	-4.3	13.1	2120.3	1015.1	332.33	626.3	0.287213	0.567652	cold calcareous soil
TP2019072801	87.884	28.1732	4316	Strong	Strong	Alpine desert	Middle TP Alpine Steppe Subregion	3.90083	-4.9	11.5	1799.7	758.8	375.13	558.6	0.323634	0.535227	cold calcareous soil
TP2019072802	88.4605	28.2631	4507.33	Medium	Medium	Alpine steppe	Middle TP Alpine Steppe Subregion	3.29667	-5.1	10.6	1613.5	606.2	397.22	518.7	0.345582	0.505724	cold calcareous soil
TP2019072803	89.1495	28.2147	4506	Strong	Strong	Alpine steppe	Middle TP Alpine Steppe Subregion	3.17917	-5.2	10.2	1569.4	560.6	405.45	509.5	0.354193	0.499105	cold calcareous soil
TP2019072901	89.575	28.9644	4061.5	Medium	Medium	Alpine steppe	Middle TP Alpine Steppe Subregion	4.46917	-4.5	12	1952.8	845.6	341.14	600.5	0.268182	0.589117	cold calcareous soil
TP2019072902	89.2573	29.0614	3927.5	Medium	Medium	Alpine shrubland	Middle TP Alpine Steppe Subregion	5.98667	-3.1	13.7	2370.5	1158.7	341.75	684.7	0.298349	0.551675	brown-cold calcareous soil
TP2019072903	89.1612	28.7996	4231.5	Weak	Weak	Alpine shrubland	Middle TP Alpine Steppe Subregion	4.17083	-4.5	11.6	1853.7	770.2	366.4	580.1	0.302805	0.548518	cold calcareous soil
TP2019073001	88.2283	29.5035	4186	Medium	Medium	Alpine steppe	Middle TP Alpine Steppe Subregion	5.68	-3	13.7	2262	1090.9	365.04	658.8	0.32375	0.514608	cold calcareous soil
TP2019073002	88.15	29.347	3935.5	Weak	Medium	Alpine shrubland	Middle TP Alpine Steppe Subregion	7.21583	-1.7	15.4	2714.3	1432.1	340.22	751.8	0.28156	0.563769	brown-cold calcareous soil
TP2019073101	87.0942	30.0715	5271	Medium	Medium	Alpine meadow	Middle TP Alpine Steppe Subregion	0.105833	-8.4	8.3	1013.7	259.7	373.79	363.3	0.336208	0.510883	frigid calcareous soil
TP2019073102	87.0012	30.1345	5008	Medium	Medium	Alpine meadow	Middle TP Alpine Steppe Subregion	-0.96	-9.3	7.2	822.2	141.7	385.6	295	0.352823	0.494065	frigid calcareous soil
TP2019080101	86.9581	30.4482	4923.33	Medium	Medium	Alpine meadow	Middle TP Alpine Steppe Subregion	-0.191667	-9	8.4	1002.9	263.9	358.38	362.2	0.313823	0.537532	frigid calcareous soil
TP2019080102	87.3972	30.3765	5229.33	Weak	Weak	Alpine meadow	Middle TP Alpine Steppe Subregion	-0.783333	-9.2	7.3	851.1	155.8	393.51	308.7	0.380621	0.458387	frigid calcareous soil
TP2019080201	87.6282	29.9567	4465	Strong	Strong	Alpine meadow	Middle TP Alpine Steppe Subregion	4.3575	-4.5	12.6	1949.3	892	342.02	589.5	0.368301	0.469166	grass felt soil
TP2019080202	87.7944	29.2499	4003	Medium	Medium	Alpine steppe	Middle TP Alpine Steppe Subregion	6.5825	-2.2	14.8	2525.7	1294.8	333.26	714.4	0.284052	0.559365	aeolian soil
TP2019080401	89.2575	30.3991	5019	Medium	Medium	Alpine meadow	Middle TP Alpine Steppe Subregion	-0.441667	-9.2	7.4	897.3	172.8	457.39	317.1	0.408957	0.424302	grass felt soil
TP2019080402	89.1153	30.081	4454	Strong	Strong	Alpine shrubland	Middle TP Alpine Steppe Subregion	2.08583	-6.6	9.8	1387.2	478.3	435.6	458.6	0.373976	0.461342	dark felty soil
TP2019080403	89.0697	29.6689	4086	Medium	Medium	Alpine meadow	Middle TP Alpine Steppe Subregion	3.17417	-5.3	10.7	1607.5	612.4	427.48	513.6	0.353282	0.483858	dark felty soil
TP2019080501	90.184	29.371	3744.5	Medium	Medium	Alpine shrubland	Middle TP Alpine Steppe Subregion	5.99667	-3.5	13.8	2403.4	1196.9	369.65	686.1	0.317586	0.537922	brown-cold calcareous soil
TP2019080502	90.6299	29.2166	4265	Medium	Medium	Alpine steppe	Middle TP Alpine Steppe Subregion	4.7375	-4.2	12.2	2021.2	898	421.9	607.9	0.36648	0.486213	dark felty soil
TP2019080601	90.3568	28.7723	4722	Medium	Medium	Alpine meadow	Middle TP Alpine Steppe Subregion	2.00917	-6.2	8.9	1281.8	372.2	461.98	433.2	0.403878	0.443417	grass felt soil
TP2019080602	90.5448	28.4993	5049.5	Medium	Medium	Alpine meadow	Middle TP Alpine Steppe Subregion	0.515	-7	6.9	903.6	132.9	531.53	319.8	0.464653	0.376026	grass felt soil
TP2019080701	91.5359	28.4453	4704	Medium	Medium	Alpine steppe	Middle TP Alpine Steppe Subregion	3.03	-4	9.1	1419.2	431.6	575.54	450.8	0.452475	0.395184	grass felt soil
TP2019080702	91.5552	28.4442	4896	Medium	Medium	Alpine meadow	Middle TP Alpine Steppe Subregion	1.85417	-4.9	7.8	1121.2	249.6	605.02	370.4	0.479371	0.363577	grass felt soil
TP2019080703	91.7187	29.0146	3930.5	Weak	Weak	Alpine meadow	Middle TP Alpine Steppe Subregion	7.1775	-1	14.2	2663.8	1331	470.47	723.8	0.366435	0.492836	brown-cold calcareous soil
TP2019080801	91.8799	29.4617	3878	Medium	Medium	Alpine shrubland	Middle TP Alpine Steppe Subregion	6.5775	-2	14	2506	1244.1	498.72	692.9	0.404703	0.449762	brown-cold calcareous soil
TP2019080802	91.4713	29.7696	3748.33	Medium	Medium	Alpine shrubland	Middle TP Alpine Steppe Subregion	5.11917	-4.1	12.9	2148.8	1010.4	500.54	625.4	0.389881	0.466546	brown-cold calcareous soil
TP2019081001	90.5816	30.0624	4273.33	Medium	Medium	Alpine steppe	Middle TP Alpine Steppe Subregion	2.19333	-7.5	10.4	1486.9	562	457.38	478.7	0.38773	0.463948	dark felty soil
TP2019081002	91.2282	30.5064	4328.5	Strong	Strong	Alpine meadow	Middle TP Alpine Steppe Subregion	1.7875	-8.6	10.7	1472.7	575.7	486.69	461.1	0.428681	0.428135	frigid calcareous soil
TP2019081003	91.692	31.0597	4703	Medium	Medium	Alpine meadow	Eastern TP Alpine Scrub and Alpine Meadow Subregion	-1.1125	-11.6	8.3	955.3	244.3	499.64	323.9	0.449257	0.407162	grass felt soil
TP2020071101	85.1586	29.4928	4688.33	Medium	Weak	Alpine meadow	Middle TP Alpine Steppe Subregion	-0.6225	-8.5	7.7	846.3	174.2	369.42	295.8	0.322349	0.58686	frigid calcareous soil
TP2020071102	84.5573	29.5128	4689	Medium	Weak	Alpine shrubland	Middle TP Alpine Steppe Subregion	-1.01667	-8.9	7.4	786.1	143.6	356.98	277.2	0.322905	0.58964	frigid calcareous soil
TP2020071201	83.9536	31.0748	4643	Medium	Medium	Alpine steppe	Middle TP Alpine Steppe Subregion	0.0516669	-10.7	11.2	1258.6	500.5	212.97	425.3	0.208392	0.684007	grass felt soil
TP2020071202	84.2958	30.678	4865	Medium	Weak	Alpine steppe	Middle TP Alpine Steppe Subregion	-1.68917	-11.4	8.5	868.9	223.1	270.34	316.9	0.263061	0.634148	frigid calcareous soil
TP2020071203	84.5181	30.1563	4959.5	Medium	Weak	Alpine steppe	Middle TP Alpine Steppe Subregion	-3.16333	-11.7	6	544.1	31.1	333.5	151.7	0.319179	0.582613	meadow soil
TP2020071204	84.3825	29.8708	4920	Medium	Weak	Alpine meadow	Middle TP Alpine Steppe Subregion	-1.92417	-10.3	7	696.3	100.2	332.4	248.2	0.335464	0.570216	grass felt soil
TP2020071301	83.9603	29.7553	4520	Medium	Weak	Alpine steppe	Middle TP Alpine Steppe Subregion	-1.2	-9.7	7.7	810	167.3	318.29	290	0.277465	0.640842	frigid calcareous soil
TP2020071302	83.4987	30.0361	4789.5	Medium	Weak	Alpine steppe	Middle TP Alpine Steppe Subregion	-1.77917	-10.8	7.6	770.5	151.4	288.14	279.7	0.27044	0.646168	frigid calcareous soil
TP2020071303	82.8308	32.3907	4732	Medium	Weak	Alpine desert	Middle TP Alpine Steppe Subregion	-0.140834	-12.5	12.5	1376.3	610.9	141.31	461	0.150945	0.725381	frigid calcareous soil
TP2020071304	82.4461	30.6046	5153.5	Medium	Weak	Alpine steppe	North-western TP Alpine Desert Subregion	-4.605	-14.3	5.6	449.1	10.2	262.38	114.6	0.272789	0.640297	frigid calcareous soil
TP2020071401	81.5771	31.0761	5175	Medium	Weak	Alpine meadow	North-western TP Alpine Desert Subregion	-3.18583	-14	7.9	730.8	154.3	195.47	277.3	0.207432	0.700694	frigid calcareous soil
TP2020071402	81.4158	30.8379	4776.5	Medium	Weak	Alpine desert	North-western TP Alpine Desert Subregion	-0.801666	-11.8	10.3	1107.5	396.4	171.14	395.2	0.174194	0.732478	frigid calcareous soil
TP2020071501	81.0973	31.0115	4755.67	Medium	Weak	Alpine steppe	North-western TP Alpine Desert Subregion	-1.06583	-12.3	10.3	1089.4	391.5	160.32	392.7	0.165762	0.736414	frigid calcareous soil
TP2020071502	80.5466	31.354	4781.33	Medium	Weak	Alpine steppe	North-western TP Alpine Desert Subregion	-1.08417	-12.7	10.9	1136.7	438.9	138.65	407.2	0.147657	0.742478	cold calcareous soil
TP2020071503	80.2018	31.8448	4556.33	Medium	Weak	Alpine steppe	North-western TP Alpine Desert Subregion	0.273333	-12.1	13	1443.8	673.9	101.87	487.5	0.123553	0.749153	frigid calcareous soil
TP2020071601	80.0326	32.3237	4899.33	Medium	Weak	Alpine desert	North-western TP Alpine Desert Subregion	-2.11917	-14.4	10.8	1047.7	397	118.03	384.6	0.144243	0.732721	frigid calcareous soil
TP2020071602	79.8877	32.7249	4908	Medium	Weak	Alpine steppe	North-western TP Alpine Desert Subregion	-3.06083	-15.4	9.9	906.3	300.7	127.76	341	0.15383	0.724822	frigid calcareous soil
TP2020071603	79.8053	33.222	4381	Medium	Weak	Alpine desert	North-western TP Alpine Desert Subregion	-0.400833	-13.4	12.8	1369.5	622.2	96.08	463.4	0.09872	0.754852	frigid calcareous soil
TP2020071701	80.2543	33.1285	4465.5	Medium	Weak	Alpine desert	North-western TP Alpine Desert Subregion	-0.8175	-13.8	12.4	1295.5	569.6	98.12	443.5	0.113835	0.748015	frigid calcareous soil
TP2020071702	80.47	33.1823	4592	Medium	Weak	Alpine steppe	North-western TP Alpine Desert Subregion	-1.3225	-14.2	11.8	1202.8	501.3	105.54	419.6	0.115966	0.746793	frigid calcareous soil
TP2020071703	80.3309	33.4273	4367.5	Medium	Weak	Alpine desert	North-western TP Alpine Desert Subregion	0.0133331	-13.2	13.2	1452.2	678.1	93.19	478.8	0.100507	0.754437	frigid calcareous soil
TP2020071801	80.4033	34.4355	5181.33	Medium	Weak	Alpine steppe	North-western TP Alpine Desert Subregion	-5.36	-17.8	6.7	522.3	57.9	170.98	170.4	0.194721	0.690314	frigid calcareous soil
TP2020071802	80.388	34.2705	5051.5	Medium	Weak	Alpine steppe	North-western TP Alpine Desert Subregion	-6.19917	-18.5	5.9	420.7	18.9	181.94	124.2	0.210186	0.675846	chisley soil
TP2020071803	80.6903	34.0048	4675	Medium	Weak	Alpine desert	North-western TP Alpine Desert Subregion	-2.76	-15.6	9.8	934.3	301	131.52	339.4	0.140949	0.732748	frigid calcareous soil
TP2020071901	80.91	33.2645	4422	Medium	Weak	Alpine steppe	North-western TP Alpine Desert Subregion	-0.445	-13.5	12.6	1361.6	611.2	101.42	459.9	0.108431	0.751475	frigid calcareous soil
TP2020071902	81.329	33.1512	4533.5	Medium	Weak	Alpine steppe	North-western TP Alpine Desert Subregion	-0.923333	-13.8	12.1	1266.8	540.7	112.43	438.8	0.121506	0.744422	frigid calcareous soil
TP2020071903	81.6096	32.9829	4584	Medium	Weak	Alpine steppe	Middle TP Alpine Steppe Subregion	-1.15667	-13.9	11.7	1218.2	504.7	120.5	425.3	0.130053	0.739332	frigid calcareous soil
TP2020071904	81.5582	32.9772	4791	Medium	Weak	Alpine steppe	Middle TP Alpine Steppe Subregion	-2.13667	-14.7	10.6	1044.9	383.2	131.21	378.6	0.144691	0.72875	frigid calcareous soil
TP2020071905	81.3365	32.652	4760	Medium	Weak	Alpine shrubland	Middle TP Alpine Steppe Subregion	-2.4375	-14.8	10.3	989.4	347.2	133.75	363.9	0.13323	0.738151	frigid calcareous soil
TP2020072001	80.8546	32.5083	4838.5	Medium	Weak	Alpine shrubland	North-western TP Alpine Desert Subregion	-2.45667	-14.8	10.3	989.9	351.7	127.15	363.8	0.133303	0.737944	frigid calcareous soil
TP2020072002	80.8399	32.2102	4523	Medium	Weak	Alpine steppe	North-western TP Alpine Desert Subregion	-0.105833	-12.6	12.8	1394.1	637.9	103.09	469.9	0.110241	0.752401	cold calcareous soil
TP2020072101	81.2349	32.1372	4849.33	Medium	Weak	Alpine steppe	Middle TP Alpine Steppe Subregion	-1.73583	-13.9	10.8	1083.2	409.4	131.66	389.4	0.139827	0.73733	frigid calcareous soil
TP2020072102	81.0815	31.995	4780	Medium	Weak	Alpine steppe	Middle TP Alpine Steppe Subregion	-1.79	-13.8	10.7	1066.3	397.4	132.91	388.6	0.139106	0.739071	frigid calcareous soil
TP2020072103	81.0198	31.8607	4875.5	Medium	Weak	Alpine steppe	North-western TP Alpine Desert Subregion	-2.1625	-14	10.1	993.4	345.8	140.34	367	0.154786	0.730075	frigid calcareous soil
TP2020072104	81.2733	31.5161	4984	Medium	Weak	Alpine steppe	Middle TP Alpine Steppe Subregion	-2.325	-13.8	9.5	926.7	291.7	159.04	348	0.171705	0.723159	frigid calcareous soil
TP2020072201	82.0178	30.5576	5173.5	Medium	Weak	Alpine steppe	North-western TP Alpine Desert Subregion	-6.215	-15.7	3.8	249.8	0	282.11	0	0.304158	0.609258	frigid frozen soil
TP2020072202	82.2224	31.0919	5153.5	Medium	Weak	Alpine meadow	Middle TP Alpine Steppe Subregion	-4.86333	-15.2	6	478.6	25.9	235.87	139.7	0.260866	0.646851	frigid calcareous soil
TP2020072203	82.2534	31.3391	4892	Medium	Weak	Alpine steppe	Middle TP Alpine Steppe Subregion	-2.59417	-13.6	8.8	844.4	227.7	191.02	319.7	0.197589	0.702346	frigid calcareous soil
TP2020072301	81.8269	31.6954	5044.67	Medium	Weak	Alpine steppe	Middle TP Alpine Steppe Subregion	-1.70667	-13.4	10.3	1039.5	367.7	155.86	375.8	0.164867	0.725083	frigid calcareous soil
TP2020072302	81.9612	31.9932	4603.5	Medium	Weak	Alpine steppe	Middle TP Alpine Steppe Subregion	-0.658333	-12.8	11.7	1253.9	522.7	137.45	433.9	0.145009	0.735621	frigid calcareous soil
TP2020072303	82.0977	32.3486	4815.33	Medium	Weak	Alpine steppe	Middle TP Alpine Steppe Subregion	-0.00166623	-12.5	12.7	1403.5	634	125.28	467.5	0.131419	0.741787	meadow soil
TP2020072304	82.7816	32.4308	4495	Medium	Weak	Alpine steppe	Middle TP Alpine Steppe Subregion	-0.364167	-12.8	12.3	1335.7	582.1	142.02	449.2	0.168853	0.709969	frigid calcareous soil
TP2020072305	83.385	32.4187	4653.5	Medium	Weak	Alpine steppe	Middle TP Alpine Steppe Subregion	-0.964167	-13.2	11.6	1221.8	498.5	162.45	422.9	0.165772	0.709546	frigid calcareous soil
TP2020072401	85.517	32.9233	4963.33	Medium	Weak	Alpine steppe	Middle TP Alpine Steppe Subregion	-3.2925	-15	8.6	804.2	197.3	242.06	296.1	0.258151	0.606113	frigid calcareous soil
TP2020072402	85.4293	32.7116	5025	Medium	Weak	Alpine steppe	Middle TP Alpine Steppe Subregion	-3.255	-14.8	8.6	800.7	195	245.48	296.3	0.243844	0.621454	frigid calcareous soil
TP2020072403	84.8076	32.5411	4913	Medium	Weak	Alpine steppe	Middle TP Alpine Steppe Subregion	-2.47583	-14.2	9.7	944.7	297.1	217.69	347.5	0.223501	0.644844	frigid calcareous soil
TP2020072404	84.3245	32.5329	4753	Medium	Weak	Alpine steppe	Middle TP Alpine Steppe Subregion	-1.56417	-13.6	10.9	1116.8	421.1	189.77	392.9	0.19374	0.67644	frigid calcareous soil
TP2020072501	84.1512	33.1218	4463	Medium	Weak	Alpine steppe	Middle TP Alpine Steppe Subregion	-1.52833	-14.1	11.1	1151.1	445.5	173.78	401.6	0.181257	0.689646	frigid calcareous soil
TP2020072502	84.0628	32.988	4649	Medium	Weak	Alpine steppe	Middle TP Alpine Steppe Subregion	-1.465	-13.9	11.2	1158.4	451.7	173.18	403.1	0.179278	0.691575	frigid calcareous soil
TP2020072503	84.2533	32.6318	4659.5	Medium	Weak	Alpine steppe	Middle TP Alpine Steppe Subregion	-1.24333	-13.5	11.3	1181.5	467.6	181.3	410.4	0.187321	0.683058	frigid calcareous soil
TP2020072504	83.949	32.5351	4816	Medium	Weak	Alpine steppe	Middle TP Alpine Steppe Subregion	-2.4525	-14.4	9.9	966.2	318.1	192.77	353.4	0.203921	0.6691	frigid calcareous soil
TP2020072505	83.6114	32.6724	4871	Medium	Weak	Alpine steppe	Middle TP Alpine Steppe Subregion	-2.44417	-14.6	10.1	975.3	325.8	181.87	355.3	0.193276	0.681343	frigid calcareous soil
TP2020072601	83.8572	32.0036	4857	Medium	Weak	Alpine steppe	Middle TP Alpine Steppe Subregion	-3.9975	-15.2	7.9	683.5	131.1	229.41	257.9	0.251874	0.626444	frigid calcareous soil
TP2020073001	94.426	36.4393	2782.25	Strong	Strong	Temperate meadow	Temperate Desert Region	5.38833	-8.9	18.3	2679.1	1602.5	46.6	687.6	0.045676	0.756038	solonchaks
TP2020073002	93.2413	36.9072	2854	Strong	Strong	Temperate meadow	Temperate Desert Region	3.60417	-11.4	17.3	2352.6	1361.3	38.52	636.7	0.03995	0.755958	aeolian soil
TP2020073003	93.1584	36.9338	2875	Medium	Weak	Temperate meadow	Temperate Desert Region	3.40667	-11.6	17.1	2311.5	1329.5	39.69	631.3	0.0412	0.755971	solonchaks
TP2020073004	92.7222	37.1092	2880	Medium	Medium	Temperate meadow	Temperate Desert Region	3.08417	-12.1	17.1	2265.6	1300.4	41.07	623.1	0.043376	0.755991	grey-brown desert soil
TP2020073005	92.0122	37.6584	3108.5	Weak	Weak	Temperate desert	Temperate Desert Region	1.32083	-14.2	15.8	1941.5	1056	54.87	565.4	0.060122	0.75612	aeolian soil
TP2020073101	91.2365	37.9626	2912	Medium	Strong	Temperate desert	Temperate Desert Region	1.88833	-14.3	16.8	2116.9	1201.7	59.87	595.5	0.065784	0.756191	grey-brown desert soil
TP2020073102	91.2393	37.9674	2977	Medium	Strong	Temperate desert	Temperate Desert Region	1.88833	-14.3	16.8	2116.9	1201.7	59.87	595.5	0.065784	0.756191	grey-brown desert soil
TP2020073103	91.4507	37.9157	3372	Medium	Strong	Temperate desert	Temperate Desert Region	-0.275	-15.9	14.3	1649.7	830.8	78.74	506.9	0.089592	0.756312	grey-brown desert soil
TP2020080101	93.3799	38.667	2814	Medium	Strong	Temperate meadow	Temperate Desert Region	3.45417	-11.7	17.9	2357	1388.2	24.01	651	0.026618	0.756028	grey-brown desert soil
TP2020080102	94.3063	38.4154	3021	Medium	Strong	Temperate desert	Temperate Desert Region	2.7775	-11	15.7	2066.6	1126	64.95	599.2	0.069924	0.756384	desert solonchaks
TP2020080103	94.3347	38.2542	2766	Medium	Strong	Temperate meadow	Temperate Desert Region	4.42833	-9.7	17.6	2457.7	1437.9	51.01	665.7	0.053766	0.756211	solonchaks
TP2020080104	94.4869	38.1203	2811	Medium	Strong	Temperate meadow	Temperate Desert Region	4.37	-9.7	17.3	2429.8	1411.2	54.29	661.7	0.056744	0.756227	desert solonchaks
TP2020080105	94.5017	38.0579	2848.5	Medium	Strong	Temperate meadow	Temperate Desert Region	4.3875	-9.7	17.4	2434.4	1414.5	53.49	661.8	0.056239	0.756215	grey-brown desert soil
TP2020080106	94.6661	38.0268	2929.5	Medium	Strong	Temperate desert	Temperate Desert Region	4.07167	-9.8	16.8	2342	1336.3	60.51	645.8	0.063369	0.756281	grey-brown desert soil
TP2020080107	94.8621	38.0406	3129	Strong	Strong	Temperate desert	Temperate Desert Region	2.9375	-10.5	15.4	2054.2	1102.8	77.12	595.1	0.084275	0.756461	grey-brown desert soil
TP2020080201	95.3866	37.7963	3259.5	Medium	Strong	Temperate desert	Temperate Desert Region	2.42583	-10.8	14.6	1914.2	986.1	92.35	568.4	0.093103	0.756486	cold calcareous soil
TP2020080202	95.4514	37.6693	3264	Strong	Strong	Temperate desert	Temperate Desert Region	2.85333	-10.5	15.1	2014.6	1064	86.84	588.2	0.090402	0.756444	cold calcareous soil
TP2020080203	95.6831	37.5454	3335	Strong	Strong	Temperate desert	Temperate Desert Region	2.44417	-10.9	14.6	1918.1	987.1	94.88	567.3	0.099062	0.756471	cold calcareous soil
TP2020080204	95.0502	36.6695	2722	Medium	Strong	Temperate desert	Temperate Desert Region	6.15167	-8.1	19	2857.2	1744	44.8	719.8	0.043666	0.755985	solonchaks
TP2020080301	95.2849	36.331	2914	Medium	Strong	Temperate desert	Temperate Desert Region	4.97	-9.1	17.6	2547.8	1488.2	62.78	668.6	0.061292	0.756111	grey-brown desert soil
TP2020080302	95.5551	36.3836	2786	Medium	Strong	Temperate desert	Temperate Desert Region	5.71667	-8.5	18.4	2745.8	1649	57.75	700.9	0.056012	0.756019	aeolian soil
TP2020080303	96.455	36.4885	2752	Medium	Strong	Temperate desert	Temperate Desert Region	5.655	-8.8	18.4	2743.3	1645.8	61.75	705.7	0.060255	0.755974	solonchaks
TP2020080305	96.4951	37.068	3205	Medium	Medium	Temperate desert	Temperate Desert Region	3.01167	-10.6	15.2	2056.8	1092	100.83	591.6	0.106032	0.756356	grey-brown desert soil
TP2020080401	97.2633	37.6328	4175.5	Medium	Strong	Alpine meadow	Temperate Desert Region	-2.93917	-14.9	8.3	809.4	187.5	247.68	283	0.301958	0.607227	frigid calcareous soil
TP2020080402	97.2989	37.5594	4156	Strong	Strong	Alpine meadow	Temperate Desert Region	-2.91167	-14.9	8.4	812.8	189.7	249	283.2	0.28631	0.624871	frigid calcareous soil
TP2020080403	97.4338	37.4858	4086.5	Strong	Strong	Alpine meadow	Temperate Desert Region	-1.9175	-14	9.4	980.6	294.4	237.11	340.8	0.249545	0.665098	frigid calcareous soil
TP2020080404	97.1194	37.4687	2793	Medium	Medium	Temperate desert	Temperate Desert Region	0.2	-12.5	11.9	1401.7	589.9	178.89	452.5	0.190869	0.721365	brown pedocals
TP2020080501	97.4854	37.2624	2893	Medium	Strong	Temperate desert	Temperate Desert Region	4.35167	-8.9	16.4	2325.6	1297.8	137.73	627.1	0.13709	0.756359	aeolian soil
TP2020080502	97.6343	37.0544	2902	Medium	Strong	Temperate desert	Temperate Desert Region	4.54583	-8.8	16.6	2367.6	1329.2	144.79	633.5	0.142492	0.755689	grey-brown desert soil
TP2020080503	97.6724	36.914	3326	Strong	Strong	Temperate desert	Temperate Desert Region	1.8475	-10.9	13.6	1728.8	831.2	186.91	518	0.180673	0.734005	brown pedocals
TP2020080504	97.6886	36.7589	2976	Strong	Strong	Temperate desert	Temperate Desert Region	4.46917	-8.9	16.5	2351.1	1315.4	150.88	632.6	0.147942	0.753343	brown pedocals
TP2020080505	97.9839	36.6496	3080	Medium	Strong	Temperate desert	Temperate Desert Region	3.75667	-9.3	15.6	2157.2	1158.2	183.7	596.9	0.180802	0.735706	brown pedocals
TP2020080601	97.7526	36.0193	3074	Strong	Strong	Temperate steppe	Temperate Desert Region	3.75833	-9.7	15.9	2204.2	1199.7	177.35	603.8	0.170026	0.742624	brown pedocals
TP2020080602	98.2039	36.431	3221.5	Strong	Strong	Alpine steppe	Temperate Desert Region	2.7175	-10.1	14.4	1903.7	957.9	218.13	544.5	0.209769	0.711961	brown pedocals
TP2020080603	98.7771	36.6588	3659	Medium	Strong	Alpine steppe	Temperate Desert Region	-0.0725002	-12.2	11	1276.5	487	303.21	403	0.314074	0.59509	brown pedocals
TP2020080701	98.8564	37.1121	3669	Strong	Strong	Alpine meadow	Temperate Desert Region	-0.424167	-12.4	10.6	1204.9	437.5	312.36	386.9	0.345021	0.559597	cold calcareous soil
TP2020080702	99.1313	37.2262	3369	Strong	Strong	Alpine meadow	Temperate Desert Region	0.463333	-11.8	11.5	1384.2	562.2	318.06	422.8	0.327746	0.578324	chestnut soil
TP2021070201	101.665	36.0837	2332	Weak	Weak	Temperate desert	Temperate Steppe Region	2.99	-9.3	13.7	1901.6	917	476.97	523.8	0.497344	0.372048	dark felty soil
TP2021070202	101.072	35.7627	3397.67	Strong	Medium	Alpine meadow	Middle TP Alpine Steppe Subregion	0.349167	-12.2	11.1	1370	528.9	481.79	415.2	0.4592	0.416194	chestnut soil
TP2021070203	100.848	35.2946	3327	Strong	Medium	Alpine meadow	Eastern TP Alpine Scrub and Alpine Meadow Subregion	0.796667	-12.3	11.8	1504.9	625	450.56	438.5	0.425348	0.455776	chernozem
TP2021070301	101.423	35.2321	3787	Strong	Medium	Alpine meadow	Eastern TP Alpine Scrub and Alpine Meadow Subregion	-1.47417	-13.8	9.1	997.2	273.7	526.69	310.1	0.506712	0.361199	grass felt soil
TP2021070302	101.756	34.6387	3619	Strong	Medium	Alpine meadow	Eastern TP Alpine Scrub and Alpine Meadow Subregion	-0.459166	-12.1	9.7	1126.3	350.7	566.74	335.1	0.519382	0.345823	grass felt soil
TP2021070401	102.45	34.6177	3147.5	Strong	Medium	Alpine shrubland	Warm Temperate Deciduous Broadleaf Forest Region	2.55833	-8.9	12.6	1712.1	753.6	571.64	453.6	0.517865	0.347794	dark felty soil
TP2021070402	102.811	34.8791	3094	Strong	Medium	Alpine meadow	Warm Temperate Deciduous Broadleaf Forest Region	1.7025	-9.6	11.7	1512.1	610.5	559.59	417.9	0.492678	0.379006	dark felty soil
TP2021070403	102.777	35.3018	2471	Weak	Weak	Temperate desert	Warm Temperate Deciduous Broadleaf Forest Region	5.625	-6.8	16.3	2526.4	1396	470.38	600.9	0.42118	0.464967	gray cinnamon soil
TP2021070404	102.758	35.5669	3334	Strong	Strong	Alpine shrubland	Warm Temperate Deciduous Broadleaf Forest Region	-0.388333	-11.8	9.8	1123.1	353.4	561.4	344	0.527874	0.335344	dark felty soil
TP2021070501	101.957	36.2703	3140	Medium	Medium	Alpine shrubland	Temperate Steppe Region	0.773333	-11.4	11.3	1406.4	549.6	527.06	418	0.489614	0.382272	dark felty soil
TP2021070502	102.282	36.4999	2140	Medium	Strong	Temperate desert	Temperate Steppe Region	7.11167	-6.6	18.6	3015.6	1820.4	339.99	680	0.3	0.600208	irrigation silting soil
TP2021070503	102.877	36.2947	1825	Medium	Medium	Temperate steppe	Temperate Steppe Region	8.41917	-5.5	20.3	3390.2	2139.6	317.73	719.1	0.28962	0.616076	sierozem
TP2021070601	102.56	36.8849	2264	Strong	Strong	Alpine shrubland	Temperate Steppe Region	5.39833	-7.9	17.1	2566.5	1467.7	371.09	605.7	0.382801	0.515016	gray cinnamon soil
TP2021070602	102.173	37.1742	2561	Strong	Strong	Temperate steppe	Temperate Steppe Region	3.645	-9.6	15.2	2139.9	1128.6	426.36	549.8	0.402611	0.491091	gray cinnamon soil
TP2021070603	101.782	37.1845	3316	Strong	Strong	Alpine shrubland	Temperate Steppe Region	-0.25	-12.6	10.7	1253.2	456.3	514.97	385.1	0.523649	0.34064	chernozem
TP2021070701	101.427	37.3259	3632.5	Strong	Strong	Alpine shrubland	Temperate Steppe Region	-2.91917	-14.8	7.7	757.2	142.1	541.44	239.7	0.56734	0.285593	grass felt soil
TP2021070702	101.226	37.7614	3391	Medium	Medium	Alpine shrubland	Temperate Desert Region	-1.24083	-13.8	10	1114	371.3	479.28	361.5	0.512778	0.354331	dark felty soil
TP2021070703	100.896	38.066	3339	Strong	Strong	Alpine meadow	Temperate Desert Region	-1.87	-14.5	9.7	1034.2	324.9	462.34	343	0.517364	0.348565	grass felt soil
TP2021070801	100.2	38.2109	2723.5	Strong	Strong	Alpine steppe	Temperate Desert Region	1.56	-11.6	13.6	1726	833.9	363.03	489.3	0.341895	0.565987	cold calcareous soil
TP2021070802	99.727	38.333	3237.33	Strong	Strong	Alpine meadow	Temperate Desert Region	-0.311666	-12.8	11.4	1316.1	527.7	361.77	404	0.404224	0.490692	dark felty soil
TP2021070803	99.301	38.5979	3571	Strong	Strong	Alpine meadow	Temperate Desert Region	-2.26333	-14.4	9.4	960.8	283.7	354.41	315.9	0.391902	0.506278	dark felty soil
TP2021070901	100.528	37.7527	3457.67	Strong	Strong	Alpine meadow	Temperate Desert Region	-1.865	-14.1	9.2	981.6	283.9	463.3	324.6	0.498624	0.372142	dark felty soil
TP2021070902	100.486	37.2802	3334	Strong	Strong	Alpine meadow	Temperate Desert Region	-0.4075	-12.9	10.4	1220.3	436.6	451.31	385.7	0.46956	0.407226	chernozem
TP2021070903	99.7213	37.1942	3253.5	Strong	Strong	Alpine meadow	Temperate Desert Region	0.424166	-12.1	11.4	1380	553	369.29	419.7	0.382972	0.511189	chestnut soil
TP2021071001	98.6684	37.6156	3626.67	Strong	Strong	Alpine meadow	Temperate Desert Region	-0.918333	-12.8	10.2	1126.2	387.1	302.33	367.2	0.315022	0.595401	dark felty soil
TP2021071002	98.3854	37.9352	3846	Strong	Medium	Alpine meadow	Temperate Desert Region	-1.97833	-13.8	9.2	953.3	274.9	297.15	319.4	0.322127	0.587532	alluvial soil
TP2021071003	98.2673	38.337	4030.5	Strong	Strong	Alpine meadow	Temperate Desert Region	-3.24833	-15.1	8.1	768.8	164.9	306.58	258	0.341802	0.564736	bog soil
TP2021071004	98.0406	38.7136	3796	Strong	Medium	Alpine steppe	Temperate Desert Region	-2.6325	-15.1	9.1	913.6	256.4	275.04	311.5	0.301513	0.612022	cold calcareous soil
TP2021071101	98.2954	39.0491	3950.5	Weak	Weak	Alpine meadow	Temperate Desert Region	-3.94917	-16.7	8	741.5	156.8	303.56	252	0.371915	0.530039	frigid calcareous soil
TP2021071102	97.8549	39.3195	2988	Weak	Weak	Temperate steppe	Temperate Desert Region	-1.81917	-15.3	10.6	1135.4	414.7	238.83	382	0.302797	0.61132	grass felt soil
TP2021071103	97.7111	39.67	2730	Weak	Medium	Temperate steppe	Temperate Desert Region	2.37583	-12.3	15.7	2043.1	1110.1	158.46	573.1	0.178402	0.736441	chestnut soil
TP2021071201	97.2806	40.1377	1582.5	Weak	Strong	Temperate desert	Temperate Desert Region	7.86667	-7.8	22.1	3426.2	2263.8	74.21	784	0.078704	0.756558	grey-brown desert soil
TP2021071202	96.8161	40.0928	1782	Medium	Strong	Temperate desert	Temperate Desert Region	7.11667	-8	21	3188.1	2055.6	84.06	752.5	0.090251	0.756606	grey-brown desert soil
TP2021071203	96.404	39.7663	2817.67	Weak	Medium	Temperate desert	Temperate Desert Region	2.59917	-11	15.3	2014.3	1082.2	145.86	575.5	0.163839	0.745853	brown pedocals
TP2021071204	95.9592	39.7573	2328.5	Weak	Weak	Temperate desert	Temperate Desert Region	5.18333	-8.7	18	2611.9	1559	120.82	677.7	0.128874	0.756775	meadow soil
TP2021071401	94.2362	40.0612	1259	Weak	Weak	Temperate desert	Temperate Desert Region	10.8567	-5.6	25.6	4277.5	2995.5	41.4	916.9	0.043881	0.75591	brown desert soil
TP2021071402	95.8118	39.0335	3253.67	Medium	Weak	Temperate desert	Temperate Desert Region	1.70583	-11	13.6	1730.4	843.3	146.69	526.4	0.158178	0.747272	cold calcareous soil
TP2021071403	95.5681	39.2355	3178.5	Medium	Weak	Temperate desert	Temperate Desert Region	1.96167	-10.8	13.9	1790.9	891.5	146.37	537.3	0.166366	0.741928	meadow soil
TP2021071404	95.3224	39.325	3112	Weak	Weak	Temperate desert	Temperate Desert Region	1.77	-11	13.7	1752.6	863.1	146.77	532.9	0.164122	0.743597	cold calcareous soil
TP2021071501	94.558	39.6178	1926	Medium	Medium	Temperate desert	Temperate Desert Region	8.0975	-6.6	21.5	3400	2215.1	88.46	802	0.093364	0.756354	grey-brown desert soil
TP2021071502	94.0717	39.0395	2939	Weak	Weak	Temperate desert	Temperate Desert Region	2.78583	-11.3	16.1	2100.3	1161.8	71.48	602.8	0.080844	0.756481	grey-brown desert soil
TP2021071601	90.1576	38.4013	3244	Strong	Weak	Temperate desert	Temperate Desert Region	-0.299167	-16.8	14.6	1704.4	874.4	103.43	516.2	0.113497	0.756548	grey-brown desert soil
TP2021071602	90.1888	39	2893	Strong	Weak	Temperate desert	Temperate Desert Region	1.75667	-15.7	17.2	2187.7	1267.2	86.67	606.2	0.095842	0.756499	brown pedocals
TP2021071603	90.1109	39.1233	2283	Medium	Weak	Temperate desert	Temperate Desert Region	4.41	-13.7	20.2	2812.5	1786.1	62.09	705.2	0.067168	0.756345	chisley soil
TP2021071604	89.6376	39.1941	1480	Medium	Weak	Temperate desert	Temperate Desert Region	9.10083	-10	25.4	4025.8	2830.6	29.94	861.3	0.031982	0.756144	brown desert soil
TP2021071701	88.4263	39.6705	806	Medium	Weak	Temperate desert	Temperate Desert Region	12.0875	-7.7	28.3	4860.3	3569.6	19.47	930.5	0.018976	0.756283	desert solonchaks
TP2021071702	88.355	39.514	805	Medium	Weak	Temperate meadow	Temperate Desert Region	12.2275	-7.3	28.4	4886.8	3589.7	18.3	933.9	0.017799	0.756278	solonchaks
TP2021071801	88.2047	38.677	1731	Weak	Strong	Temperate desert	Temperate Desert Region	6.39	-11.3	21.5	3223.8	2116.9	54.64	742.8	0.053278	0.7567	chisley soil
TP2021071802	88.1337	38.7093	1420	Weak	Medium	Temperate desert	Temperate Desert Region	9.34917	-8.9	24.7	4012.5	2799.6	32.51	839.6	0.032008	0.7565	brown desert soil
TP2021071803	88.1694	39.1038	827	Medium	Medium	Temperate meadow	Temperate Desert Region	12.3767	-6.7	28.3	4897.2	3590	16.84	932.3	0.016138	0.756277	solonchaks
TP2021071902	87.0008	38.6884	1009	Weak	Medium	Temperate desert	Temperate Desert Region	11.9433	-6.6	27.4	4733.1	3431.5	19.89	907.7	0.018549	0.756433	solonchaks
TP2021071903	86.8653	38.6968	1008.5	Medium	Medium	Temperate desert	Temperate Desert Region	11.6967	-6.7	26.9	4647.9	3350	22.56	891.1	0.020803	0.756564	solonchaks
TP2021071904	86.3137	38.5746	1062	Weak	Weak	Temperate meadow	Temperate Desert Region	11.6992	-6.7	26.8	4648	3349.4	22.97	888.8	0.021036	0.756589	solonchaks
TP2021072001	85.8028	37.4992	2363.5	Strong	Medium	Temperate steppe	Temperate Desert Region	11.6875	-6.7	26.7	4642.7	3341.8	24.03	881.5	0.02186	0.756653	brown desert soil
TP2021072002	85.7493	37.407	2968	Medium	Strong	Alpine steppe	Temperate Desert Region	2.925	-13.3	16.5	2262.3	1281.9	93.98	594	0.09318	0.757169	brown pedocals
TP2021072101	86.5163	37.6027	3213	Weak	Medium	Temperate desert	Temperate Desert Region	0.515	-15.1	14	1729.6	858.4	120.34	503.1	0.12163	0.751202	brown pedocals
TP2021072102	86.1959	37.6183	2950.67	Medium	Weak	Temperate steppe	Temperate Desert Region	2.49	-13.6	16.1	2167	1206.8	97.57	579.5	0.097255	0.757266	meadow soil
TP2021072103	85.954	37.6899	2061	Strong	Medium	Temperate desert	Temperate Desert Region	6.78667	-10.2	20.9	3236.9	2099.6	56.24	728.4	0.049257	0.756899	brown desert soil
TP2021072201	84.6449	38.0081	1260	Medium	Weak	Temperate meadow	Temperate Desert Region	11.4492	-7.7	26.5	4626.2	3336.4	28.82	872.8	0.025326	0.756365	solonchaks
TP2021072202	83.6013	37.4783	1365	Weak	Medium	Temperate meadow	Temperate Desert Region	11.675	-6.9	26.1	4643.2	3335.9	35.61	893.7	0.031367	0.756017	solonchaks
TP2021072301	82.7837	37.2305	1361	Strong	Medium	Temperate meadow	Temperate Desert Region	12.06	-5.6	25.8	4685.1	3347.6	42.74	909.4	0.037871	0.75591	solonchaks
TP2021072302	82.9444	37.6865	1291	Medium	Weak	Temperate desert	Temperate Desert Region	12.0275	-6.6	26.3	4744.5	3424.2	38.23	900.7	0.034499	0.756028	aeolian soil
TP2021072303	82.9163	36.8985	1683.5	Weak	Medium	Temperate desert	Temperate Desert Region	10.6967	-6.3	24.1	4251.7	2954.3	50.32	874.8	0.045127	0.755924	brown desert soil
TP2021072401	82.2387	36.8351	1598	Weak	Medium	Temperate desert	Temperate Desert Region	11.0592	-5.6	24.1	4325.3	3004.4	53.27	883.3	0.047063	0.755961	brown desert soil
TP2021072402	81.3498	36.9739	1377	Strong	Strong	Temperate meadow	Temperate Desert Region	12.1942	-4.7	25.1	4666.9	3302.5	49.45	902.9	0.042801	0.756216	solonchaks
TP2021072403	80.6797	36.8931	1500.5	Medium	Weak	Temperate desert	Temperate Desert Region	11.9233	-4.8	24.7	4576.7	3219.1	47.92	889.1	0.040937	0.756481	brown desert soil
TP2021072501	79.4529	36.9068	2005.33	Medium	Weak	Temperate desert	Temperate Desert Region	9.15583	-6.9	21.6	3746	2481.5	65.94	804.9	0.058293	0.756861	brown desert soil
TP2021072601	79.9158	36.9455	1522.5	Weak	Strong	Temperate desert	Temperate Desert Region	11.765	-4.7	24.4	4513.6	3156.6	48.16	882.4	0.041271	0.756658	brown desert soil
TP2021072602	79.9903	37.3521	1287	Medium	Strong	Temperate desert	Temperate Desert Region	12.4467	-4.4	25.2	4742.5	3368.1	45.4	896.7	0.038995	0.756726	aeolian soil
TP2021072701	78.991	37.2295	1529	Medium	Medium	Temperate desert	Temperate Desert Region	11.6583	-5.2	24.5	4506	3158	54.74	884.4	0.048143	0.756699	brown desert soil
TP2021072702	78.7969	37.3199	1420.5	Weak	Medium	Temperate desert	Temperate Desert Region	12.1575	-4.9	25.1	4664.1	3300.4	53.68	900.4	0.046361	0.756644	brown desert soil
TP2021072703	78.2685	37.5314	1437	Weak	Weak	Temperate desert	Temperate Desert Region	12.0958	-5.1	25.2	4652.8	3293.3	59.3	899.5	0.052339	0.756677	brown desert soil
TP2021072901	78.5636	36.2203	3900	Strong	Medium	Alpine meadow	North-western TP Alpine Desert Subregion	-0.1275	-14.3	11.6	1394.2	568	148.44	443.5	0.150231	0.744652	frigid desert soil
TP2021072902	77.632	36.4104	4648	None	Strong	Alpine desert	North-western TP Alpine Desert Subregion	-4.2625	-17.6	7	628.5	85.9	218	211.7	0.231441	0.678262	frigid desert soil
TP2021072903	77.0515	36.5601	4671.33	Medium	Medium	Alpine desert	North-western TP Alpine Desert Subregion	-6.29833	-19.2	4.7	333.3	0	259.99	0	0.269402	0.643535	frigid frozen soil
TP2021072904	77.1103	36.6573	3841.33	Strong	Medium	Alpine desert	North-western TP Alpine Desert Subregion	-0.808334	-14.8	10.8	1244.2	459.2	182.66	410.5	0.172416	0.737275	cold calcareous soil
TP2021072905	76.9534	37.0828	3125.67	Strong	Medium	Alpine desert	Temperate Desert Region	3.5025	-11.4	15.5	2217.1	1194	140.24	613.9	0.144336	0.756884	brown pedocals
TP2021072906	77.0974	37.2574	2292	Medium	Medium	Temperate desert	Temperate Desert Region	6.73583	-8.9	19.1	3062.6	1891.4	108.11	736.3	0.093887	0.757008	chisley soil
TP2021072907	77.2882	37.4947	1812	Weak	Strong	Temperate desert	Temperate Desert Region	9.8925	-6.4	22.5	3962.1	2669.8	81.3	843.7	0.074328	0.756871	brown desert soil
TP2021073101	76.7875	38.4766	1310.5	Medium	Weak	Temperate desert	Temperate Desert Region	11.735	-5.4	24.9	4540.8	3193.9	70.88	903.3	0.064259	0.757164	brown desert soil
TP2021073102	76.1043	39.0391	1301	Weak	Medium	Temperate desert	Temperate Desert Region	12.4583	-4.9	26	4769.6	3402.9	80.23	926	0.074106	0.757361	brown desert soil
TP2021080201	75.4611	37.1059	3833	Strong	Medium	Alpine desert	North-western TP Alpine Desert Subregion	-0.0333337	-13.7	11.6	1376.3	556.6	203.3	446.2	0.206503	0.71966	brown pedocals
TP2021080202	75.2792	37.7037	3191	Weak	Medium	Temperate desert	North-western TP Alpine Desert Subregion	2.8975	-11.4	14.9	2045.2	1059.5	179.66	586.7	0.179351	0.746055	brown desert soil
TP2021080203	74.9278	38.239	3960	Strong	Medium	Alpine desert	North-western TP Alpine Desert Subregion	-1.2175	-14.6	10.4	1148.9	401.7	249.06	391.6	0.258948	0.670298	cold calcareous soil
TP2021080204	75.5949	39.329	1420	Strong	Weak	Temperate desert	Temperate Desert Region	11.965	-4.7	25.3	4588.6	3232.4	101.75	908.7	0.09324	0.757338	irrigation silting soil

## Sheet: plant traits
Site	Species	Famliy	Growth form	Life form	LT	FW	DW	LDMC	LWC	LA	SLA	LMA	LCC	LNC	LPC
TP2018071501	Astragalus peterae	Fabaceae	herb	perennial	0.1975	0.01	0.0016	0.16	5.25	0.478667	299.167	33.4262	421.269	42.5135	2.3668
TP2018071501	Potentilla saundersiana	Rosaceae	herb	perennial	0.308	0.0186667	0.006	0.321429	2.11111	1.21433	202.389	49.4098	408.297	27.568	1.46119
TP2018071501	Kobresia pygmaea	Cyperaceae	herb	perennial	0.2025	0.01575	0.007	0.444444	1.25	1.9492	278.457	35.9122	420.16	18.3385	1.04689
TP2018071501	Oxytropis kansuensis	Fabaceae	herb	perennial	0.254	0.0088	0.003	0.340909	1.93333	0.686818	228.939	43.6797	404.759	38.0079	2.9106
TP2018071501	Potentilla fruticosa	Rosaceae	shrub	deciduous	0.12	0.0084	0.0036	0.428571	1.33333	0.629333	174.815	57.2034	449.703	22.4455	1.38251
TP2018071501	Aster flaccidus	Asteraceae	herb	perennial	0.236	0.0348	0.0052	0.149425	5.69231	1.8708	359.769	27.7956	371.326	19.6326	1.33228
TP2018071501	Gentiana clarkei	Gentianaceae	herb	annual	0.08	0.0016087	0.00026087	0.162162	5.16667	0.0718571	275.452	36.3039	413.999	21.7066	1.84563
TP2018071501	Leontopodium haplophylloides	Asteraceae	herb	perennial	0.136667	0.0078125	0.0021875	0.28	2.57143	0.6865	313.829	31.8645	383.187	20.083	0.994517
TP2018071501	Polygonum macrophyllum	Polygonaceae	herb	perennial	0.155	0.0203333	0.00466667	0.229508	3.35714	1.4641	313.736	31.874	402.708	35.4728	2.00285
TP2018071501	Polygonum viviparum	Polygonaceae	herb	perennial	0.29	0.0892683	0.0234146	0.262295	2.8125	9.7264	415.398	24.0733	427.637	29.8873	1.66147
TP2018071502	Leontopodium nanum	Asteraceae	herb	perennial	0.214	0.0046	0.0012	0.26087	2.83333	0.267333	222.778	44.8878	401.67	16.2727	1.46725
TP2018071502	Potentilla bifurca var. humilior	Rosaceae	herb	perennial	0.19	0.0034	0.0012	0.352941	1.83333	0.25923	216.025	46.2909	417.273	19.2511	1.19027
TP2018071502	Dracocephalum heterophyllum	Lamiaceae	herb	perennial	0.436	0.0356	0.0108	0.303371	2.2963	1.1502	106.5	93.8967	387.79	29.5038	1.78026
TP2018071502	Potentilla saundersiana	Rosaceae	herb	perennial	0.554	0.0266	0.0076	0.285714	2.5	1.677	220.658	45.319	405.138	21.0651	1.67761
TP2018071502	Kobresia vidua	Cyperaceae	herb	perennial	0.22	0.075	0.01	0.133333	6.5	0.3443	34.43	290.444	422.819	15.2977	1.3124
TP2018071502	Astragalus polycladus	Fabaceae	herb	perennial	0.206	0.00214286	0.000428571	0.2	4	0.10435	243.483	41.0706	392.339	40.0791	2.06268
TP2018071502	Euphorbia kansuensis	Euphorbiaceae	herb	perennial	0.352	0.0278	0.0086	0.309353	2.23256	1.47487	171.496	58.3104	411.868	30.5105	1.96812
TP2018071502	Neotorularia korolkowii	Brassicaceae	herb	annual	0.435	0.0156	0.0034	0.217949	3.58824	0.921267	270.961	36.9057	321.781	28.0271	1.9025
TP2018071502	Gentiana siphonantha	Gentianaceae	herb	perennial	0.97	0.548	0.102	0.186131	4.37255	15.5122	152.08	65.7547	418.238	22.3905	1.51244
TP2018071502	Saussurea superba	Asteraceae	herb	perennial	1.222	0.502	0.077	0.153386	5.51948	9.3444	121.356	82.4023	413.456	17.023	1.21628
TP2018071502	Gentiana officinalis	Gentianaceae	herb	perennial	0.8575	0.5375	0.12	0.223256	3.47917	10.8798	90.665	110.296	419.643	20.5348	1.47488
TP2018071502	Oxytropis deflexa	Fabaceae	herb	perennial	0.114	0.0034	0.0018	0.529412	0.888889	0.3334	185.222	53.9892	387.28	33.2773	1.65648
TP2018071502	Heracleum millefolium	Apiaceae	herb	perennial	0.31	0.0046	0.0022	0.478261	1.09091	0.403222	183.283	54.5605	394.965	35.3935	2.16887
TP2018071502	Lancea tibetica	Mazaceae	herb	perennial	0.572	0.106	0.0256	0.241509	3.14062	3.2208	125.812	79.4834	419.671	17.3919	1.17959
TP2018071502	Aconitum pendulum	Ranunculaceae	herb	perennial	0.632	0.209	0.038	0.181818	4.5	6.3552	167.242	59.7936	382.387	26.7814	1.7696
TP2018071502	Draba stenocarpa	Brassicaceae	herb	perennial	0.356	0.0064	0.0016	0.25	3	0.274267	171.417	58.3374	334	22.9877	1.22462
TP2018071502	Dontostemon glandulosus	Brassicaceae	herb	annual	0.326	0.0106	0.0016	0.150943	5.625	0.4898	306.125	32.6664	328.832	30.688	1.31039
TP2018071502	Taraxacum scariosum	Asteraceae	herb	perennial	1.2	0.03875	0.0035	0.0903226	10.0714	1.6628	475.086	21.0488	383.627	34.3823	1.82952
TP2018071601	Lagotis brachystachya	Plantaginaceae	herb	perennial	0.304	0.131	0.028	0.21374	3.67857	3.8539	137.639	72.6537	428.928	22.2559	1.65558
TP2018071601	Potentilla anserina	Rosaceae	herb	perennial	0.1825	0.0032	0.001	0.3125	2.2	0.279267	279.267	35.8081	408.822	22.3188	1.51163
TP2018071601	Artemisia frigida	Asteraceae	semi-shrub	perennial	0.092	0.0126154	0.00369231	0.292683	2.41667	0.5709	154.619	64.6752	433.285	28.2621	2.09312
TP2018071601	Saxifraga przewalskii	Saxifragaceae	herb	perennial	0.268	0.0418	0.0076	0.181818	4.5	1.48527	195.43	51.1693	431.927	19.2371	1.48709
TP2018071601	Aconitum pendulum	Ranunculaceae	herb	perennial	0.48	0.356	0.08	0.224719	3.45	10.123	126.538	79.028	406.233	31.0193	2.07469
TP2018071601	Aster flaccidus	Asteraceae	herb	perennial	0.278	0.101	0.034	0.336634	1.97059	2.9369	86.3794	115.768	404.717	22.9314	1.7029
TP2018071601	Polygonum sibiricum var. thomsonii	Polygonaceae	herb	perennial	0.322	0.091	0.021	0.230769	3.33333	2.626	125.048	79.9695	436.26	33.8151	2.20664
TP2018071601	Pomatosace filicula	Primulaceae	herb	annual	0.3675	0.0336	0.02	0.595238	0.68	0.962067	48.1033	207.886	386.739	19.7675	1.10522
TP2018071601	Smelowskia tibetica	Brassicaceae	herb	perennial	0.15	0.0326	0.008	0.245399	3.075	0.2321	29.0125	344.679	375.66	29.5394	1.75998
TP2018071601	Pedicularis plicata	Orobanchaceae	herb	perennial	0.1475	0.0438	0.0098	0.223744	3.46939	1.585	161.735	61.8297	392.542	20.4962	2.79325
TP2018071602	Artemisia minor	Asteraceae	semi-shrub	perennial	0.1425	0.007	0.0017	0.242857	3.11765	0.2682	157.765	63.3855	408.641	22.6069	2.7721
TP2018071602	Cremanthodium brunneopilosum	Asteraceae	herb	perennial	0.52	1.062	0.209	0.196798	4.08134	14.0167	67.0656	149.108	394.858	19.1067	1.73605
TP2018071602	Heracleum millefolium	Apiaceae	herb	perennial	0.3	0.0085	0.00266667	0.313725	2.1875	0.5228	196.05	51.0074	406.892	24.4891	2.17347
TP2018071602	Thermopsis inflata	Fabaceae	herb	perennial	0.288	0.0615	0.0145	0.235772	3.24138	1.6106	111.076	90.0286	428.49	34.1202	1.93318
TP2018071602	Incarvillea compacta	Bignoniaceae	herb	perennial	0.434	0.104	0.0235	0.225962	3.42553	4.0816	173.685	57.5755	438.602	22.0324	1.87208
TP2018071602	Astragalus nivalis	Fabaceae	herb	perennial	0.192	0.0061	0.0045	0.737705	0.355556	0.194	43.1111	231.959	422.178	42.2937	2.21091
TP2018071701	Kobresia humilis	Cyperaceae	herb	perennial	0.756667	0.0178	0.0072	0.404494	1.47222	0.7874	109.361	91.4402	420.721	25.4717	1.33838
TP2018071701	Anaphalis flavescens	Asteraceae	herb	perennial	0.1375	0.037	0.0095	0.256757	2.89474	2.2944	241.516	41.4052	362.675	22.5365	1.59916
TP2018071701	Cremanthodium brunneopilosum	Asteraceae	herb	perennial	1.06	1.068	0.386	0.361423	1.76684	14.4674	37.4803	266.807	306.556	17.2959	0.946708
TP2018071701	Potentilla fruticosa	Rosaceae	shrub	deciduous	0.186667	0.0086	0.004	0.465116	1.15	0.4378	109.45	91.3659	444.685	22.3234	1.64721
TP2018071701	Aster flaccidus	Asteraceae	herb	perennial	0.55	0.062	0.011	0.177419	4.63636	2.0048	182.255	54.8683	392.887	27.4397	1.74163
TP2018071701	Microula tibetica	Boraginaceae	herb	perennial	0.5775	0.632	0.130667	0.206751	3.83673	10.906	83.4643	119.812	364.092	33.7851	1.42708
TP2018071701	Rheum pumilum	Polygonaceae	herb	perennial	0.85	1.038	0.564	0.543353	0.840426	10.5704	18.7418	533.565	346.347	22.6904	1.43875
TP2018071702	Potentilla fruticosa	Rosaceae	shrub	deciduous	0.22	0.0108	0.0048	0.444444	1.25	0.496	103.333	96.7742	453.596	15.6401	1.28924
TP2018071702	Rheum rhomboideum	Polygonaceae	herb	perennial	0.726667	6.578	1.534	0.233202	3.28814	92.1277	60.0571	166.508	420.339	44.1217	1.86388
TP2018071702	Astragalus densiflorus	Fabaceae	herb	perennial	0.276667	0.0051	0.0016	0.313725	2.1875	0.3014	188.375	53.0856	439.162	20.4942	1.26867
TP2018071702	Myricaria prostrata	Tamaricaceae	shrub	deciduous	0.205	0.000820896	0.000261194	0.318182	2.14286	0.0191364	73.2649	136.491	462.129	22.2931	1.58437
TP2018071702	Saxifraga przewalskii	Saxifragaceae	herb	perennial	0.3275	0.0664	0.0138	0.207831	3.81159	1.23492	89.4867	111.748	377.269	38.8148	2.21355
TP2018071702	Astragalus arnoldii	Fabaceae	herb	perennial	0.26	0.000933333	0.000233333	0.25	3	0.0355926	152.54	65.5567	411.685	20.2519	1.72553
TP2018071702	Aster flaccidus	Asteraceae	herb	perennial	0.6175	0.0362	0.0092	0.254144	2.93478	1.4214	154.5	64.7249	355.206	7.68978	0.59635
TP2018071702	Arenaria bryophylla	Caryophyllaceae	herb	perennial	0.149	0.0012	0.0008	0.666667	0.5	0.0303846	37.9808	263.291	374.382	19.4286	1.66607
TP2018071801	Kobresia humilis	Cyperaceae	herb	perennial	0.676667	0.0192	0.0066	0.34375	1.90909	0.7551	114.409	87.4056	419.948	21.4981	1.45513
TP2018071801	Saussurea hookeri	Asteraceae	herb	perennial	0.813333	0.025	0.00966667	0.386667	1.58621	1.1835	122.431	81.6786	424.3	23.3396	1.28626
TP2018071802	Androsace zambalensis	Primulaceae	herb	perennial	0.27	0.00103333	0.0002	0.193548	4.16667	0.0383333	191.667	52.1739	221.664	10.9414	0.777763
TP2018071802	Microula tangutica	Boraginaceae	herb	perennial	0.3125	0.0252	0.0046	0.18254	4.47826	1.1662	253.522	39.4443	340.5	21.2922	2.08044
TP2018071802	Kobresia	Cyperaceae	herb	perennial	0.615	0.00822222	0.00488889	0.594595	0.681818	0.796	162.818	61.4182	412.631	24.5927	1.61006
TP2018071802	Coluria longifolia	Rosaceae	herb	perennial	0.21	0.0067	0.0028	0.41791	1.39286	0.478769	170.989	58.4833	406.407	25.1783	1.57927
TP2018071802	Rheum pumilum	Polygonaceae	herb	perennial	0.436667	0.186	0.0253333	0.136201	6.34211	3.89953	153.929	64.965	357.543	30.4875	2.2083
TP2018071901	Potentilla bifurca var. humilior	Rosaceae	herb	perennial	0.24	0.0106	0.004	0.377358	1.65	0.5798	144.95	68.9893	409.889	21.295	1.44835
TP2018071901	Anaphalis flavescens	Asteraceae	herb	perennial	0.52	0.0609524	0.0157143	0.257812	2.87879	2.16243	137.609	72.6696	375.654	12.245	1.25806
TP2018071901	Astragalus polycladus	Fabaceae	herb	perennial	0.2	0.0016	0.0003	0.1875	4.33333	0.0953	317.667	31.4795	393.168	43.5481	2.20291
TP2018071901	Potentilla anserina	Rosaceae	herb	perennial	0.366	0.0066	0.0024	0.363636	1.75	0.34064	141.933	70.4556	417.813	19.4438	1.34641
TP2018071901	Stipa roborowskyi	Poaceae	herb	perennial	0.3275	0.0056	0.0022	0.392857	1.54545	0.4215	191.591	52.1945	432.255	16.253	1.11292
TP2018071901	Heracleum millefolium	Apiaceae	herb	perennial	0.23	0.004	0.0012	0.3	2.33333	0.4428	369	27.1003	399.831	28.2021	2.41343
TP2018071901	Leontopodium pusillum	Asteraceae	herb	perennial	0.3	0.0066	0.0017	0.257576	2.88235	0.537	315.882	31.6574	396.891	14.6395	1.1061
TP2018071901	Aster flaccidus	Asteraceae	herb	perennial	0.674	0.1	0.0173333	0.173333	4.76923	2.6244	151.408	66.0468	398.519	20.5609	1.6507
TP2018071901	Poa	Poaceae	herb	perennial	0.288	0.0034	0.0022	0.647059	0.545455	0.278075	126.398	79.1153	402.226	17.885	1.13872
TP2018071902	Lonicera rupicola var. minuta	Caprifoliaceae	shrub	deciduous	0.248	0.0037	0.0018	0.486486	1.05556	0.28471	158.172	63.2223	436.004	24.0322	1.59404
TP2018071902	Ajuga lupulina	Lamiaceae	herb	perennial	0.412	0.176471	0.0408824	0.231667	3.31655	5.39679	132.008	75.753	396.501	16.7909	1.24809
TP2018071902	Lagotis brachystachya	Plantaginaceae	herb	perennial	0.7	0.326	0.0715	0.219325	3.55944	8.1878	114.515	87.325	397.532	21.4812	1.61637
TP2018071902	Callianthemum pimpinelloides	Ranunculaceae	herb	perennial	0.36	0.0385	0.0095	0.246753	3.05263	1.14795	120.837	82.7562	417.188	21.4845	1.28125
TP2018071902	Incarvillea compacta	Bignoniaceae	herb	perennial	0.612	0.073	0.016	0.219178	3.5625	1.8588	116.175	86.077	371.767	25.1692	1.4247
TP2018071902	Lancea tibetica	Mazaceae	herb	perennial	0.724	0.136667	0.0316667	0.231707	3.31579	3.475	109.737	91.1271	443.393	20.5667	1.30681
TP2018071902	Aconitum pendulum	Ranunculaceae	herb	perennial	0.924	0.259167	0.0558333	0.215434	3.64179	7.57417	135.657	73.7155	378.779	21.2499	1.1831
TP2018071902	Ajania przewalskii	Asteraceae	herb	perennial	0.25	0.00075	0.00065	0.866667	0.153846	0.1543	237.385	42.1257	419.614	23.3041	1.7306
TP2018071903	Lonicera rupicola var. minuta	Caprifoliaceae	shrub	deciduous	0.32	0.005	0.0016	0.32	2.125	0.24184	151.15	66.1594	452.927	28.5626	1.88246
TP2018071903	Pedicularis kansuensis	Orobanchaceae	herb	annual	0.096	0.0014	0.0004	0.285714	2.5	0.12355	308.875	32.3756	397.061	21.2579	1.93891
TP2018071903	Cirsium souliei	Asteraceae	herb	perennial	0.43	2.576	0.374	0.145186	5.8877	43.516	116.353	85.9454	398.148	28.9858	1.06592
TP2018071903	Aconitum gymnandrum	Ranunculaceae	herb	annual	0.516667	0.1768	0.034	0.192308	4.2	10.2234	300.688	33.257	375.17	38.9128	1.74894
TP2018071903	Astragalus handelii	Fabaceae	herb	perennial	0.275	0.0062	0.0017	0.274194	2.64706	0.3521	207.118	48.2817	413.692	45.4748	2.07166
TP2018071903	Microula tibetica	Boraginaceae	herb	perennial	0.763333	1.438	0.227	0.157858	5.3348	17.3117	76.2628	131.125	337.554	32.8375	1.64392
TP2018071903	Potentilla plumosa	Rosaceae	herb	perennial	0.346667	0.09	0.035	0.388889	1.57143	3.6238	103.537	96.5837	412.876	16.4523	1.70377
TP2018071903	Pomatosace filicula	Primulaceae	herb	annual	0.533333	0.0822857	0.0122857	0.149306	5.69767	2.1052	171.353	58.3589	408.625	21.248	1.10722
TP2018071904	Ajuga lupulina	Lamiaceae	herb	perennial	0.412	0.29	0.054	0.186207	4.37037	11.3062	209.374	47.7614	366.294	18.9227	1.68789
TP2018071904	Potentilla plumosa	Rosaceae	herb	perennial	0.586667	0.116	0.0393333	0.33908	1.94915	4.83017	122.801	81.4327	434.091	19.5201	1.59014
TP2018071904	Morina chinensis	Caprifoliaceae	herb	perennial	1.28	0.243	0.067	0.27572	2.62687	6.5924	98.394	101.632	391.184	16.3853	1.29497
TP2018072001	Ligularia virgaurea	Asteraceae	herb	perennial	0.71	1.5025	0.325	0.216306	3.62308	28.6255	88.0785	113.535	433.291	16.4431	1.96268
TP2018072001	Pedicularis verticillata	Orobanchaceae	herb	perennial	0.286	0.0188	0.0034	0.180851	4.52941	1.1136	327.529	30.5316	369.567	23.9371	7.90673
TP2018072001	Gentiana straminea	Gentianaceae	herb	perennial	0.69	0.922	0.224	0.24295	3.11607	18.0012	80.3627	124.436	423.791	17.4104	1.79627
TP2018072001	Delphinium densiflorum	Ranunculaceae	herb	perennial	0.403333	0.91	0.2	0.21978	3.55	25.802	129.01	77.5134	358.175	23.0739	2.35321
TP2018072001	Saussurea woodiana	Asteraceae	herb	perennial	0.263333	0.354	0.072	0.20339	3.91667	10.0048	138.956	71.9652	402.434	15.7204	1.56711
TP2018072001	Hedysarum sikkimense	Fabaceae	herb	perennial	0.274	0.009	0.0023	0.255556	2.91304	0.3582	155.739	64.2099	441.771	35.583	2.33908
TP2018072101	Pedicularis rhinanthoides subsp. labellata	Orobanchaceae	herb	perennial	0.183333	0.0409091	0.00909091	0.222222	3.5	0.0926364	10.19	981.354	/	/	/
TP2018072101	Caltha scaposa	Ranunculaceae	herb	perennial	0.33	0.174	0.042	0.241379	3.14286	5.36283	127.687	78.3168	404.214	26.2808	2.28312
TP2018072101	Potentilla fruticosa	Rosaceae	shrub	deciduous	0.185	0.01318	0.0056	0.424886	1.35357	1.11233	198.631	50.3446	445.648	23.5582	1.89741
TP2018072101	Meconopsis integrifolia	Papaveraceae	herb	perennial	0.52	1.12	0.216	0.192857	4.18519	22.4682	104.019	96.1359	393.24	17.7488	2.39314
TP2018072101	Lancea tibetica	Mazaceae	herb	perennial	0.246667	0.0903333	0.0193333	0.214022	3.67241	2.89844	149.92	66.7024	415.912	20.3149	1.63344
TP2018072101	Gentianopsis paludosa	Gentianaceae	herb	annual	0.272	0.0445	0.0085	0.191011	4.23529	2.21908	261.069	38.3041	/	/	/
TP2018072101	Polygonum sibiricum var. thomsonii	Polygonaceae	herb	perennial	0.39	0.0603333	0.0126667	0.209945	3.76316	1.8625	147.039	68.0089	402.602	28.36	2.31163
TP2018072102	Spiraea alpina	Rosaceae	shrub	deciduous	0.17	0.0037	0.0016	0.432432	1.3125	0.550923	344.327	29.0422	469.797	22.9321	1.29883
TP2018072102	Nardostachys jatamansi	Caprifoliaceae	herb	perennial	0.46	0.262	0.05	0.19084	4.24	5.744	114.88	87.0474	417.228	19.6884	1.31823
TP2018072102	Cremanthodium brunneopilosum	Asteraceae	herb	perennial	0.426667	2.405	0.425	0.176715	4.65882	44.8427	105.512	94.7758	393.441	24.4857	1.9351
TP2018072102	Ligularia virgaurea	Asteraceae	herb	perennial	0.383333	1.572	0.204	0.129771	6.70588	56.2345	275.659	36.2767	391.839	26.4443	2.33954
TP2018072102	Potentilla fruticosa	Rosaceae	shrub	deciduous	0.23	0.0091	0.0041	0.450549	1.21951	0.654818	159.712	62.6128	449.854	18.1804	1.19252
TP2018072102	Soroseris erysimoides	Asteraceae	herb	perennial	0.313333	0.0925	0.0125	0.135135	6.4	2.15689	172.551	57.9538	406.385	22.4308	1.37157
TP2018072102	Salix oritrepha	Salicaceae	shrub	deciduous	0.184	0.0235	0.016	0.680851	0.46875	0.8998	56.2375	177.817	458.457	26.6956	1.95116
TP2018072201	Ajuga lupulina	Lamiaceae	herb	perennial	0.356667	0.191	0.0385	0.201571	3.96104	5.6439	146.595	68.2152	392.277	18.2987	2.66843
TP2018072201	Pedicularis kansuensis subsp. Kansuensis	Orobanchaceae	herb	annual	0.136667	0.0012	0.0006	0.5	1	0.0989	164.833	60.6673	402.951	20.1626	2.97558
TP2018072201	Deyeuxia scabrescens	Poaceae	herb	perennial	0.185	0.0175	0.0055	0.314286	2.18182	0.801	145.636	68.6642	408.459	17.4838	2.46554
TP2018072201	Potentilla bifurca	Rosaceae	herb	perennial	0.174	0.0096	0.003	0.3125	2.2	0.7664	255.467	39.1441	408.776	23.618	2.38518
TP2018072201	Pedicularis kansuensis	Orobanchaceae	herb	annual	0.13	0.0007	0.0002	0.285714	2.5	0.0845	422.5	23.6686	389.764	28.2424	5.79808
TP2018072201	Rheum tanguticum	Polygonaceae	herb	perennial	0.41	41.54	6.69	0.16105	5.20927	470.805	70.3744	142.097	366.137	24.1171	2.62573
TP2018072201	Gentianopsis paludosa	Gentianaceae	herb	annual	0.198	0.0655	0.0105	0.160305	5.2381	3.09138	294.417	33.9655	445.648	20.7425	2.59123
TP2018072201	Poa lipskyi	Poaceae	herb	perennial	0.253333	0.0265	0.01	0.377358	1.65	0.922875	92.2875	108.357	405.978	15.0232	1.4362
TP2018072201	Microula sikkimensis	Boraginaceae	herb	perennial	0.34	0.0865	0.0125	0.144509	5.92	4.8268	386.144	25.8971	357.817	25.694	6.22729
TP2018072201	Pomatosace filicula	Primulaceae	herb	annual	0.49	0.078	0.012	0.153846	5.5	2.2913	190.942	52.372	376.026	16.4104	2.1252
TP2018072201	Thalictrum rutifolium	Ranunculaceae	herb	perennial	0.12	0.0021	0.0007	0.333333	2	0.236429	337.755	29.6073	471.615	22.4781	2.38245
TP2018072202	Acomastylis elata var. humilis	Rosaceae	herb	perennial	0.25	0.0136	0.0052	0.382353	1.61538	0.942857	181.319	55.1515	402.567	17.283	1.65237
TP2018072202	Kobresia kansuensis	Cyperaceae	herb	perennial	0.323333	0.178	0.06	0.337079	1.96667	6.758	112.633	88.7837	425.861	19.7692	1.50571
TP2018072202	Potentilla fruticosa	Rosaceae	shrub	deciduous	0.58	0.0114	0.0038	0.333333	2	0.7696	202.526	49.3763	447.341	21.3889	2.34914
TP2018072202	Saxifraga tangutica	Saxifragaceae	herb	perennial	0.394	0.0835	0.018	0.215569	3.63889	2.40575	133.653	74.8207	436.582	21.2093	2.49594
TP2018072202	Hedysarum sikkimense	Fabaceae	herb	perennial	0.206667	0.0106	0.0022	0.207547	3.81818	0.4816	218.909	45.6811	448.166	37.5093	2.56483
TP2018072202	Kobresia royleana	Cyperaceae	herb	perennial	0.81	0.0415	0.015	0.361446	1.76667	1.2274	81.8267	122.21	404.679	13.8429	1.60125
TP2018072202	Soroseris hookeriana	Asteraceae	herb	perennial	1.186	0.34	0.037	0.108824	8.18919	5.1045	137.959	72.4851	291.496	19.3489	1.56392
TP2018072203	Anaphalis flavescens	Asteraceae	herb	perennial	0.304	0.142	0.035	0.246479	3.05714	6.3746	182.131	54.9054	436.086	19.6347	1.62104
TP2018072203	Lamiophlomis rotata	Lamiaceae	herb	perennial	1.25667	2.96333	0.53	0.178853	4.59119	75.331	142.134	70.3562	393.794	21.4439	1.59784
TP2018072203	Kobresia pygmaea	Cyperaceae	herb	perennial	0.23	0.0073	0.0032	0.438356	1.28125	0.6748	210.875	47.4215	421.789	17.2976	1.48321
TP2018072203	Ligularia virgaurea	Asteraceae	herb	perennial	0.454	3.08	0.623333	0.202381	3.94118	30.3156	48.6347	205.615	406.348	13.6025	1.29983
TP2018072203	Pedicularis cranolopha	Orobanchaceae	herb	perennial	0.16	0.0031	0.0006	0.193548	4.16667	0.171385	285.641	35.009	403.334	22.3447	2.93836
TP2018072301	Spiraea alpina	Rosaceae	shrub	deciduous	0.108	0.0024	0.002	0.833333	0.2	0.2092	104.6	95.6023	467.206	20.1045	1.53202
TP2018072301	Potentilla fruticosa	Rosaceae	shrub	deciduous	0.204	0.0098	0.0046	0.469388	1.13043	0.601857	130.839	76.4301	488.194	18.1739	1.54171
TP2018072301	Ajuga ovalifolia var. calantha	Lamiaceae	herb	annual	0.546667	0.446	0.06	0.134529	6.43333	6.60267	110.044	90.8724	380.298	16.4391	1.66248
TP2018072301	Salix oritrepha	Salicaceae	shrub	deciduous	0.23	0.028	0.011	0.392857	1.54545	1.5765	143.318	69.7748	467.217	24.2725	1.89704
TP2018072301	Sibiraea angustata	Rosaceae	shrub	deciduous	0.28	0.1345	0.052	0.386617	1.58654	6.29035	120.968	82.6663	451.837	24.9923	1.9125
TP2018072401	Acomastylis elata var. humilis	Rosaceae	herb	perennial	0.254	0.0082	0.0024	0.292683	2.41667	0.6503	270.958	36.906	415.661	20.2779	1.37279
TP2018072401	Deyeuxia scabrescens	Poaceae	herb	perennial	0.163333	0.00353846	0.002	0.565217	0.769231	0.686	343	29.1545	424.3	17.4762	1.1962
TP2018072401	Caltha scaposa	Ranunculaceae	herb	perennial	0.318	0.124	0.03	0.241935	3.13333	5.0929	169.763	58.9055	386.961	22.1656	1.71739
TP2018072401	Potentilla fruticosa	Rosaceae	shrub	deciduous	0.234	0.013	0.0054	0.415385	1.40741	0.8536	158.074	63.2615	444.856	21.9406	1.71722
TP2018072401	Pedicularis przewalskii	Orobanchaceae	herb	perennial	0.44	0.052	0.011	0.211538	3.72727	2.0362	185.109	54.0222	402.299	31.9353	1.70937
TP2018072401	Salix oritrepha	Salicaceae	shrub	deciduous	0.244	0.03	0.0126	0.42	1.38095	1.7768	141.016	70.914	469.993	27.6556	1.97436
TP2018072401	Kobresia royleana	Cyperaceae	herb	perennial	0.193333	0.022	0.007	0.318182	2.14286	1.5085	215.5	46.4037	440.574	19.6865	1.73382
TP2018072402	Lonicera rupicola var. minuta	Caprifoliaceae	shrub	deciduous	0.198	0.0034	0.0012	0.352941	1.83333	0.183733	153.111	65.312	451.349	19.017	1.61065
TP2018072402	Lagotis brachystachya	Plantaginaceae	herb	perennial	0.574	0.151	0.036	0.238411	3.19444	4.2248	117.356	85.2111	439.729	21.7	2.01662
TP2018072402	Mandragora caulescens	Solanaceae	herb	perennial	0.7	0.44	0.071	0.161364	5.19718	11.1262	156.707	63.8133	404.301	23.1378	1.59902
TP2018072402	Scrophularia przewalskii	Scrophulariaceae	herb	perennial	0.41	0.0435	0.009	0.206897	3.83333	1.9919	221.322	45.183	407.941	22.0687	2.36121
TP2018072402	Meconopsis integrifolia	Papaveraceae	herb	perennial	0.916	0.558	0.136	0.243728	3.10294	13.9412	102.509	97.5526	396.649	24.8146	2.74684
TP2018072402	Saxifraga tangutica	Saxifragaceae	herb	perennial	0.494	0.0585	0.012	0.205128	3.875	1.58285	131.904	75.8126	431.544	18.7572	1.96431
TP2018072403	Acomastylis elata var. humilis	Rosaceae	herb	perennial	0.234	0.0082	0.0024	0.292683	2.41667	0.549143	228.81	43.7045	408.776	23.2991	1.55963
TP2018072403	Metaeritrichium microuloides	Boraginaceae	herb	annual	0.408	0.029	0.005	0.172414	4.8	1.031	206.2	48.4966	364.252	19.7966	1.64045
TP2018072403	Polygonum sparsipilosum	Polygonaceae	herb	annual	0.318	0.0176	0.0032	0.181818	4.5	0.9867	308.344	32.4313	361.533	24.5268	3.1801
TP2018072403	Saxifraga sinomontana	Saxifragaceae	herb	perennial	0.0264	0.0064	0.0014	0.21875	3.57143	0.3081	220.071	45.4398	408.419	19.0861	2.04828
TP2018072403	Microula tibetica	Boraginaceae	herb	perennial	1.072	1.13	0.138	0.122124	7.18841	22.0524	159.8	62.5782	271.649	22.1594	2.50587
TP2018072403	Rheum pumilum	Polygonaceae	herb	perennial	0.718	0.318	0.057	0.179245	4.57895	7.2362	126.951	78.7706	318.225	27.4633	2.57116
TP2018072501	Descurainia sophia	Brassicaceae	herb	annual	0.0966667	0.004	0.001	0.25	3	0.254429	254.429	39.3038	374.242	26.4443	2.87013
TP2018072501	Juniperus squamata	Cupressaceae	shrub	evergreen	0.5	0.000368421	0.000315789	0.857143	0.166667	0.0347	109.883	91.0056	496.753	12.1152	1.36158
TP2018072501	Polygonum alpinum	Polygonaceae	herb	perennial	0.318	0.196	0.051	0.260204	2.84314	12.4479	244.076	40.9709	401.305	30.1292	2.42051
TP2018072501	Carum carvi	Apiaceae	herb	perennial	0.195	0.0012	0.0002	0.166667	5	0.0983333	491.667	20.339	403.207	24.9443	1.9289
TP2018072501	Chamerion angustifolium	Onagraceae	herb	perennial	0.392	0.141	0.0435	0.308511	2.24138	7.28986	167.583	59.672	399.774	28.3937	2.99677
TP2018072501	Elsholtzia densa	Lamiaceae	herb	perennial	0.137	0.098	0.023	0.234694	3.26087	6.844	297.565	33.6061	399.372	28.6797	4.21304
TP2018072501	Rumex acetosa	Polygonaceae	herb	perennial	0.85	0.77	0.08	0.103896	8.625	19.9922	249.903	40.0155	373.384	27.8876	2.7332
TP2018072501	Microula sikkimensis	Boraginaceae	herb	perennial	0.464	0.262	0.04	0.152672	5.55	9.4936	237.34	42.1336	360.904	22.7537	2.50811
TP2018072501	Spiraea schneideriana var. amphidoxa	Rosaceae	shrub	deciduous	0.186	0.009	0.0045	0.5	1	0.5936	131.911	75.8086	456.578	21.8142	1.5728
TP2018072501	Thlaspi arvense	Brassicaceae	herb	annual	0.184	0.029	0.0085	0.293103	2.41176	1.7172	202.024	49.4992	385.976	25.5176	4.06301
TP2018072501	Ribes tenue	Grossulariaceae	shrub	deciduous	0.2825	0.063	0.027	0.428571	1.33333	3.3129	122.7	81.4996	457.578	20.9373	1.84349
TP2018072501	Galeopsis bifida	Lamiaceae	herb	annual	0.3	0.1	0.023	0.23	3.34783	5.83886	253.863	39.3913	415.367	30.6314	3.45781
TP2018072501	Sibiraea angustata	Rosaceae	shrub	deciduous	0.284	0.068	0.036	0.529412	0.888889	3.1616	87.8222	113.866	456.701	18.3305	1.52238
TP2018072501	Polygonum viviparum	Polygonaceae	herb	perennial	0.764	1.04	0.246	0.236538	3.22764	37.4572	152.265	65.675	416.899	28.0214	2.69637
TP2018072502	Spiraea alpina	Rosaceae	shrub	deciduous	0.122	0.0022	0.0014	0.636364	0.571429	0.261545	186.818	53.528	466.218	21.6059	1.40141
TP2018072502	Salix atopantha	Salicaceae	shrub	deciduous	0.27	0.0275	0.0105	0.381818	1.61905	1.3659	130.086	76.8724	464.122	26.0132	1.89278
TP2018072601	Lamiophlomis rotata	Lamiaceae	herb	perennial	1.315	8.26	1.545	0.187046	4.34628	99.04	64.1036	155.998	403.21	23.0488	1.54575
TP2018072601	Astragalus polycladus	Fabaceae	herb	perennial	0.274	0.013	0.0035	0.269231	2.71429	0.6333	180.943	55.2661	384.018	34.2065	1.72225
TP2018072601	Oxytropis kansuensis	Fabaceae	herb	perennial	0.23	0.018	0.0045	0.25	3	0.8379	186.2	53.7057	409.449	32.4347	1.58727
TP2018072601	Ligularia virgaurea	Asteraceae	herb	perennial	0.67	5.29	1.00333	0.189666	4.27243	102.868	102.527	97.5355	411.571	14.551	1.02838
TP2018072601	Stellera chamaejasme	Thymelaeaceae	herb	perennial	0.202	0.0140541	0.00459459	0.326923	2.05882	0.8741	190.245	52.5637	436.853	35.8175	2.03042
TP2018072601	Gentiana straminea	Gentianaceae	herb	perennial	0.71	0.722	0.18	0.249307	3.01111	16.3262	90.7011	110.252	421.251	15.2732	1.24191
TP2018072601	Polygonum macrophyllum	Polygonaceae	herb	perennial	0.45	0.269	0.067	0.249071	3.01493	12.6594	188.946	52.9251	408.353	26.791	1.9288
TP2018072601	Sibiraea angustata	Rosaceae	shrub	deciduous	0.246	0.157	0.063	0.401274	1.49206	10.3748	164.679	60.7244	429.262	22.7763	1.38253
TP2018072602	Acanthocalyx alba	Caprifoliaceae	herb	perennial	0.612	0.4575	0.11125	0.243169	3.11236	13.391	120.369	83.0782	407.631	20.8775	1.36973
TP2018072602	Spiraea alpina	Rosaceae	shrub	deciduous	0.12	0.0012	0.001	0.833333	0.2	0.1936	193.6	51.6529	466.978	24.5488	1.54631
TP2018072602	Potentilla fruticosa	Rosaceae	shrub	deciduous	0.258	0.014	0.0064	0.457143	1.1875	0.939	146.719	68.1576	436.731	17.5517	1.33766
TP2018072602	Salix atopantha	Salicaceae	shrub	deciduous	0.262	0.04	0.017	0.425	1.35294	2.0202	118.835	84.1501	445.77	27.4598	2.04744
TP2018072602	Rumex acetosa	Polygonaceae	herb	perennial	0.84	0.576	0.054	0.09375	9.66667	15.2456	282.326	35.4201	378.897	30.356	2.17071
TP2018072602	Sibiraea angustata	Rosaceae	shrub	deciduous	0.25	0.111	0.046	0.414414	1.41304	5.6636	123.122	81.2204	444.15	22.0583	1.2184
TP2018072602	Polygonum viviparum	Polygonaceae	herb	perennial	0.448	0.414	0.102	0.246377	3.05882	18.0596	177.055	56.4797	413.516	27.1517	1.85245
TP2018072603	Acanthocalyx alba	Caprifoliaceae	herb	perennial	0.632	0.452	0.108	0.238938	3.18519	10.9443	101.336	98.682	431.7	20.4034	1.30514
TP2018072603	Caragana jubata	Fabaceae	shrub	deciduous	0.214	0.00325	0.0015	0.461538	1.16667	0.2157	143.8	69.541	/	/	/
TP2018072603	Ligusticum acuminatum	Apiaceae	herb	perennial	0.242	0.023	0.0075	0.326087	2.06667	1.25285	167.047	59.8635	419.278	30.7335	1.49533
TP2018072603	Halenia elliptica	Gentianaceae	herb	annual	0.254	0.0335	0.007	0.208955	3.78571	1.8911	270.157	37.0155	463.831	24.6881	1.83173
TP2018072603	Poa nepalensis	Poaceae	herb	perennial	0.18	0.01	0.004	0.4	1.5	0.6026	150.65	66.379	/	/	/
TP2018072603	Salix atopantha	Salicaceae	shrub	deciduous	0.212	0.0153333	0.007	0.456522	1.19048	0.846548	120.935	82.6887	456.065	21.1645	1.36726
TP2018072603	Leontopodium haplophylloides	Asteraceae	herb	perennial	0.138	0.009	0.0025	0.277778	2.6	0.705	282	35.461	/	/	/
TP2018072603	Elymus purpurascens	Poaceae	herb	perennial	0.122	0.0205882	0.01	0.485714	1.05882	1.9954	199.54	50.1153	447.341	21.3456	2.1904
TP2018072603	Sibiraea angustata	Rosaceae	shrub	deciduous	0.27	0.0885	0.0365	0.412429	1.42466	4.62495	126.711	78.9198	453.596	30.0267	1.99224
TP2018072603	Polygonum viviparum	Polygonaceae	herb	perennial	0.532	0.728	0.175	0.240385	3.16	27.5883	157.647	63.4327	430.397	25.075	1.72055
TP2018072604	Potentilla bifurca var. humilior	Rosaceae	herb	perennial	0.2	0.011	0.004	0.363636	1.75	0.59355	148.387	67.3911	417.472	23.0098	1.57267
TP2018072604	Ajuga lupulina	Lamiaceae	herb	perennial	0.43	0.3025	0.08	0.264463	2.78125	10.2206	127.757	78.2735	415.076	21.9684	1.74127
TP2018072604	Anaphalis flavescens	Asteraceae	herb	perennial	0.248	0.0525	0.015	0.285714	2.5	3.00765	200.51	49.8728	438.089	25.1199	1.75437
TP2018072604	Kobresia pygmaea	Cyperaceae	herb	perennial	0.16	0.002	0.0006	0.3	2.33333	0.169327	282.211	35.4345	427.522	18.714	1.28319
TP2018072604	Ligularia virgaurea	Asteraceae	herb	perennial	0.66	1.072	0.234	0.218284	3.5812	28.1528	120.311	83.1178	403.207	17.266	1.33228
TP2018072604	Salvia roborowskii	Lamiaceae	herb	perennial	0.318	0.155	0.034	0.219355	3.55882	8.1195	238.809	41.8745	372.469	26.8891	2.0705
TP2018072604	Microula sikkimensis	Boraginaceae	herb	perennial	0.394	0.0735	0.0115	0.156463	5.3913	2.7738	241.2	41.4594	338.459	26.0031	2.72569
TP2018072604	Ajania przewalskii	Asteraceae	herb	perennial	0.138	0.0024	0.0006	0.25	3	0.13592	226.533	44.1436	429.121	23.3899	3.02065
TP2018072701	Oxytropis kansuensis	Fabaceae	herb	perennial	0.182	0.0115	0.003	0.26087	2.83333	0.69315	231.05	43.2807	421.195	30.7216	1.77258
TP2018072701	Potentilla fruticosa	Rosaceae	shrub	deciduous	0.256	0.0204	0.0092	0.45098	1.21739	1.2316	133.87	74.6996	444.233	23.2478	2.06708
TP2018072701	Salix atopantha	Salicaceae	shrub	deciduous	0.23	0.0505	0.021	0.415842	1.40476	2.60445	124.021	80.6312	475.002	27.4598	1.97087
TP2018072701	Elymus purpurascens	Poaceae	herb	perennial	0.152	0.0125	0.005	0.4	1.5	1.46625	293.25	34.1006	439.829	23.2078	1.7415
TP2018072701	Sibiraea angustata	Rosaceae	shrub	deciduous	0.23	0.105	0.043	0.409524	1.44186	3.0703	71.4023	140.051	450.882	25.4437	1.62708
TP2018072701	Polygonum viviparum	Polygonaceae	herb	perennial	0.426	0.423	0.107	0.252955	2.95327	21.7926	203.669	49.0992	432.314	25.1695	2.1593
TP2018072702	Anaphalis flavescens	Asteraceae	herb	perennial	0.18	0.011	0.0035	0.318182	2.14286	0.71645	204.7	48.852	395.653	13.4864	1.10613
TP2018072702	Kobresia pygmaea	Cyperaceae	herb	perennial	0.17	0.0008	0.0006	0.75	0.333333	0.1572	262	38.1679	433.232	17.932	1.42051
TP2018072702	Potentilla fruticosa	Rosaceae	shrub	deciduous	0.174	0.011	0.0045	0.409091	1.44444	0.8152	181.156	55.2012	444.121	23.506	1.73431
TP2018072702	Saxifraga tangutica	Saxifragaceae	herb	perennial	0.4	0.06	0.013	0.216667	3.61538	1.9476	149.815	66.7488	443.609	16.1093	1.67109
TP2018072702	Saussurea subulata	Asteraceae	herb	perennial	0.206667	0.0065	0.002	0.307692	2.25	0.2737	136.85	73.0727	457.549	16.4904	1.41021
TP2018072801	Acomastylis elata var. humilis	Rosaceae	herb	perennial	0.312	0.032	0.0105	0.328125	2.04762	1.433	136.476	73.2729	394.622	20.6037	1.59981
TP2018072801	Saussurea hieracioides	Asteraceae	herb	perennial	0.378	0.433	0.101	0.233256	3.28713	14.8971	147.496	67.7984	426.239	18.7018	1.34714
TP2018072801	Saussurea katochaete	Asteraceae	herb	perennial	0.518	0.667	0.135	0.202399	3.94074	14.9889	111.029	90.0666	410.317	18.5413	1.31848
TP2018072801	Astragalus tongolensis	Fabaceae	herb	perennial	0.184	0.0205	0.006	0.292683	2.41667	0.60165	100.275	99.7258	427.989	46.6513	1.93882
TP2018072801	Cremanthodium brunneopilosum	Asteraceae	herb	perennial	0.584	3.184	0.482	0.151382	5.60581	73.727	152.961	65.3763	381.311	18.5118	1.45932
TP2018072801	Potentilla fruticosa	Rosaceae	shrub	deciduous	0.198	0.0112	0.0052	0.464286	1.15385	0.6825	131.25	76.1905	451.783	22.7174	1.85354
TP2018072801	Pedicularis szetschuanica	Orobanchaceae	herb	annual	0.202	0.0235	0.0055	0.234043	3.27273	1.31735	239.518	41.7505	389.102	21.3251	5.33437
TP2018072801	Kobresia tibetica	Cyperaceae	herb	perennial	0.23	0.0118	0.0052	0.440678	1.26923	0.7213	138.712	72.0921	440.538	14.9284	0.966848
TP2018072801	Polygonum viviparum	Polygonaceae	herb	perennial	0.488	0.876	0.24	0.273973	2.65	16.8716	70.2983	142.251	433.028	29.518	1.99301
TP2018072802	Lonicera rupicola var. minuta	Caprifoliaceae	shrub	deciduous	0.162	0.0042	0.0016	0.380952	1.625	0.2201	137.562	72.6942	469.016	26.9454	1.73184
TP2018072802	Ajuga lupulina	Lamiaceae	herb	perennial	0.338	0.26	0.066	0.253846	2.93939	9.67544	146.598	68.2139	421.214	20.3225	1.63464
TP2018072802	Cleistogenes squarrosa	Poaceae	herb	perennial	0.3	0.013	0.0056	0.430769	1.32143	0.611833	109.256	91.5282	433.096	18.788	1.60875
TP2018072802	Lagotis brachystachya	Plantaginaceae	herb	perennial	0.452	0.1815	0.0455	0.250689	2.98901	4.8607	106.829	93.6079	430.397	21.2303	1.69565
TP2018072802	Heracleum millefolium	Apiaceae	herb	perennial	0.176	0.0015	0.0005	0.333333	2	0.0997	199.4	50.1505	414.445	25.7068	2.25083
TP2018072802	Gentiana straminea	Gentianaceae	herb	perennial	0.564	0.781	0.191	0.244558	3.08901	16.5538	86.6691	115.381	417.813	25.115	1.94669
TP2018072803	Salix oritrepha	Salicaceae	shrub	deciduous	0.232	0.064	0.024	0.375	1.66667	3.2936	137.233	72.8686	472.725	27.183	2.09616
TP2018073001	Spiraea alpina	Rosaceae	shrub	deciduous	0.07	0.0176667	0.012	0.679245	0.472222	1.2634	105.283	94.9818	465.076	21.5039	1.30979
TP2018073001	Caragana jubata	Fabaceae	shrub	deciduous	0.206	0.0082	0.0033	0.402439	1.48485	0.44935	136.167	73.4394	464.328	32.3451	1.68617
TP2018073001	Saussurea erubescens	Asteraceae	herb	perennial	0.352	0.285	0.0655	0.229825	3.35115	9.0541	138.231	72.3429	437.812	18.8769	1.06081
TP2018073001	Potentilla fruticosa	Rosaceae	shrub	deciduous	0.182	0.026	0.011	0.423077	1.36364	1.7236	156.691	63.8199	454.607	22.2254	1.73708
TP2018073001	Gentiana straminea	Gentianaceae	herb	perennial	0.32	1.83	0.397	0.21694	3.60957	49.5856	124.901	80.0636	442.969	22.841	1.42113
TP2018073001	Salix oritrepha	Salicaceae	shrub	deciduous	0.238	0.0715	0.031	0.433566	1.30645	3.51535	113.398	88.1847	465.707	24.2442	1.71398
TP2018073001	Rhododendron capitatum	Ericaceae	shrub	evergreen	0.344	0.0086	0.0032	0.372093	1.6875	0.33255	103.922	96.2261	506.588	19.0207	1.61734
TP2018073001	Polygonum macrophyllum	Polygonaceae	herb	perennial	0.098	0.00666667	0.003	0.45	1.22222	0.4551	151.7	65.9196	419.093	29.9688	1.55649
TP2018073001	Sibiraea angustata	Rosaceae	shrub	deciduous	0.222	0.08075	0.033	0.408669	1.44697	4.5929	139.179	71.85	449.286	23.6229	1.31447
TP2018073001	Polygonum viviparum	Polygonaceae	herb	perennial	0.42	0.493	0.108	0.219067	3.56481	19.4372	179.974	55.5636	415.907	32.0342	2.15906
TP2018073002	Potentilla bifurca	Rosaceae	herb	perennial	0.202	0.0098	0.0038	0.387755	1.57895	0.624636	164.378	60.8354	397.274	23.1866	1.72244
TP2018073002	Gentiana straminea	Gentianaceae	herb	perennial	0.578	0.732	0.164	0.224044	3.46341	14.6886	89.5646	111.651	416.768	24.2279	1.43934
TP2018073002	Elsholtzia densa	Lamiaceae	herb	perennial	0.192	0.0104	0.0028	0.269231	2.71429	0.9876	352.714	28.3516	372.884	19.0385	2.38601
TP2018073002	Ajania khartensis	Asteraceae	herb	perennial	0.176	0.0096	0.0036	0.375	1.66667	0.594333	165.093	60.5721	445.515	30.5311	2.19097
TP2018073002	Lancea tibetica	Mazaceae	herb	perennial	0.242	0.046	0.0145	0.315217	2.17241	2.3589	162.683	61.4693	434.342	19.0448	1.26905
TP2018073002	Galium glabriusculum	Rubiaceae	herb	annual	0.062	0.0006	0.0002	0.333333	2	0.0631	315.5	31.6957	376.266	21.2816	3.07635
TP2018073002	Microula tibetica	Boraginaceae	herb	perennial	0.584	1.484	0.284	0.191375	4.22535	29.9768	105.552	94.7399	297.503	24.4464	1.21119
TP2018073003	Kobresia curticeps	Cyperaceae	herb	perennial	0.39	0.01225	0.005	0.408163	1.45	0.6678	133.56	74.8727	436.498	22.8132	2.52192
TP2018073003	Artemisia youngii	Asteraceae	herb	perennial	0.154	0.00633333	0.00166667	0.263158	2.8	0.4224	253.44	39.4571	409.044	17.777	1.42148
TP2018073003	Meconopsis integrifolia	Papaveraceae	herb	perennial	0.608	1.194	0.306	0.256281	2.90196	26.4376	86.3974	115.744	375.441	18.3617	2.65909
TP2018073003	Saxifraga sinomontana	Saxifragaceae	herb	perennial	0.198	0.02425	0.0035	0.14433	5.92857	0.4803	137.229	72.8711	396.925	15.8632	1.88383
TP2018073003	Saxifraga tangutica	Saxifragaceae	herb	perennial	0.286	0.053	0.0106	0.2	4	1.80005	169.816	58.8873	424.3	21.5405	2.08577
TP2018073003	Aster flaccidus	Asteraceae	herb	perennial	0.298	0.069	0.0175	0.253623	2.94286	2.71	154.857	64.5756	383.096	21.0277	2.2309
TP2018073003	Polygonum sibiricum	Polygonaceae	herb	perennial	0.348	0.0565	0.0185	0.327434	2.05405	2.0142	108.876	91.8479	402.679	24.1612	1.80007
TP2018073003	Microula tibetica	Boraginaceae	herb	perennial	0.654	0.4285	0.0655	0.152859	5.54198	11.0146	168.162	59.4665	358.109	13.7344	2.21364
TP2018073003	Rheum pumilum	Polygonaceae	herb	perennial	0.586	0.3445	0.0605	0.175617	4.69421	7.9768	131.848	75.845	362.141	23.9613	1.99521
TP2018073003	Elymus purpurascens	Poaceae	herb	perennial	0.122	0.022	0.0085	0.386364	1.58824	1.7062	200.729	49.8183	394.984	17.4644	2.06854
TP2018073101	Leontopodium nanum	Asteraceae	herb	perennial	0.104	0.002	0.001	0.5	1	0.2192	219.2	45.6204	377.856	18.5155	0.813934
TP2018073101	Anaphalis flavescens	Asteraceae	herb	perennial	0.236	0.0183333	0.00766667	0.418182	1.3913	1.0502	136.983	73.002	374.536	19.0976	0.96457
TP2018073101	Kobresia curticeps	Cyperaceae	herb	perennial	0.33	0.0144	0.006	0.416667	1.4	0.6369	106.15	94.2063	397.91	21.9704	1.12762
TP2018073101	Cremanthodium brunneopilosum	Asteraceae	herb	perennial	0.908	1.482	0.335	0.226046	3.42388	19.2153	57.3592	174.34	308.715	16.6329	0.900739
TP2018073101	Delphinium pylzowii var. trigynum	Ranunculaceae	herb	perennial	0.306	0.062	0.014	0.225806	3.42857	1.5019	107.279	93.2153	366.062	28.5623	1.43296
TP2018073101	Aster flaccidus	Asteraceae	herb	perennial	0.282	0.054	0.0145	0.268519	2.72414	1.86615	128.7	77.7001	358.349	20.0857	1.36669
TP2018073101	Microula tibetica	Boraginaceae	herb	perennial	0.272	0.202	0.084	0.415842	1.40476	6.4674	76.9929	129.882	355.287	20.0113	1.39231
TP2018073102	Dracocephalum heterophyllum	Lamiaceae	herb	perennial	0.366	0.0545	0.0125	0.229358	3.36	1.56581	125.265	79.8309	381.311	26.7349	1.66917
TP2018073102	Lagotis brachystachya	Plantaginaceae	herb	perennial	0.446	0.1115	0.0275	0.246637	3.05455	2.5792	93.7891	106.622	414.184	17.7666	1.36046
TP2018073102	Cremanthodium brunneopilosum	Asteraceae	herb	perennial	1.016	1.958	0.429	0.219101	3.5641	25.1376	58.5958	170.661	310.992	11.7343	0.887057
TP2018073102	Rheum rhomboideum	Polygonaceae	herb	perennial	0.748	10.63	2.48	0.233302	3.28629	103.366	41.6798	239.924	390.257	30.9679	2.03684
TP2018073102	Aster flaccidus	Asteraceae	herb	perennial	0.464	0.0985	0.023	0.233503	3.28261	2.78015	120.876	82.7293	377.036	21.5962	2.09674
TP2018073102	Polygonum sibiricum	Polygonaceae	herb	perennial	0.402	0.0595	0.014	0.235294	3.25	1.566	111.857	89.3997	424.83	26.3388	1.67647
TP2018073102	Poa	Poaceae	herb	perennial	0.122	0.0032	0.0008	0.25	3	0.1984	248	40.3226	/	/	/
TP2018073103	Dracocephalum heterophyllum	Lamiaceae	herb	perennial	0.444	0.1015	0.022	0.216749	3.61364	2.91247	132.385	75.5372	415.207	19.4398	1.51447
TP2018073103	Astragalus polycladus	Fabaceae	herb	perennial	0.146	0.0036	0.001	0.277778	2.6	0.2433	243.3	41.1015	406.078	30.1029	1.86284
TP2018073103	Oxytropis kansuensis	Fabaceae	herb	perennial	0.144	0.0041	0.0027	0.658537	0.518519	0.3793	140.481	71.1838	427.055	26.8748	1.37384
TP2018073103	Potentilla anserina	Rosaceae	herb	perennial	0.192	0.0106	0.0038	0.358491	1.78947	0.4103	107.974	92.6152	413.018	16.0129	1.42089
TP2018073103	Myricaria prostrata	Tamaricaceae	shrub	deciduous	0.14	0.0006	0.0002	0.333333	2	0.0405	202.5	49.3827	445.515	21.1823	0.991437
TP2018073103	Hippophae rhamnoides	Elaeagnaceae	shrub	deciduous	0.3	0.00966667	0.00366667	0.37931	1.63636	0.427633	116.627	85.7432	462.433	36.2151	2.13153
TP2018073103	Elymus purpurascens	Poaceae	herb	perennial	0.31	0.00781818	0.00418182	0.534884	0.869565	0.528375	126.351	79.1449	413.951	19.1282	1.2711
TP2018080101	Dracocephalum heterophyllum	Lamiaceae	herb	perennial	0.426	0.067	0.018	0.268657	2.72222	2.1033	116.85	85.5798	385.364	26.4151	1.65096
TP2018080101	Anaphalis flavescens	Asteraceae	herb	perennial	0.34	0.0285	0.0075	0.263158	2.8	1.3491	179.88	55.5926	354.445	13.2722	1.32491
TP2018080101	Kobresia curticeps	Cyperaceae	herb	perennial	0.15	0.015	0.006	0.4	1.5	1.07871	179.786	55.6218	404.97	21.4972	1.704
TP2018080101	Pedicularis kansuensis	Orobanchaceae	herb	annual	0.19	0.012	0.0036	0.3	2.33333	0.657	182.5	54.7945	404.59	38.8742	2.22307
TP2018080101	Saussurea arenaria	Asteraceae	herb	perennial	0.4	0.0735	0.0265	0.360544	1.77358	2.7522	103.857	96.2866	418.894	20.887	1.43156
TP2018080101	Aster flaccidus	Asteraceae	herb	perennial	0.412	0.152	0.0325	0.213816	3.67692	4.49745	138.383	72.2632	396.334	21.246	1.87069
TP2018080101	Polygonum sibiricum var. thomsonii	Polygonaceae	herb	perennial	0.4	0.095	0.0225	0.236842	3.22222	2.89135	128.504	77.8183	442.376	27.7492	2.07986
TP2018080102	Saussurea brunneopilosa	Asteraceae	herb	perennial	0.218	0.0168	0.0054	0.321429	2.11111	0.6337	117.352	85.2138	441.819	21.5259	1.19462
TP2018080102	Kobresia pygmaea	Cyperaceae	herb	perennial	0.15	0.0022	0.0008	0.363636	1.75	0.1349	168.625	59.3032	/	/	/
TP2018080103	Oxytropis kansuensis	Fabaceae	herb	perennial	0.166	0.0029	0.0009	0.310345	2.22222	0.1922	213.556	46.8262	402.623	28.903	1.79882
TP2018080103	Cremanthodium brunneopilosum	Asteraceae	herb	perennial	0.94	1.084	0.184	0.169742	4.8913	29.2205	158.807	62.9695	318.101	16.1448	1.12438
TP2018080103	Kobresia tibetica	Cyperaceae	herb	perennial	0.31	0.013	0.0056	0.430769	1.32143	0.597	106.607	93.8023	405.26	23.4895	1.24484
TP2018080201	Leontopodium pusillum	Asteraceae	herb	perennial	0.214	0.0092	0.0034	0.369565	1.70588	0.5588	164.353	60.8447	/	/	/
TP2018080201	Euphorbia kozlovii	Euphorbiaceae	herb	perennial	0.194	0.0405	0.013	0.320988	2.11538	2.1494	165.338	60.482	420.353	20.0857	1.2865
TP2018080201	Saussurea arenaria	Asteraceae	herb	perennial	0.318	0.087	0.035	0.402299	1.48571	3.0974	88.4971	112.998	386.703	19.2992	1.09348
TP2018080201	Stipa purpurea	Poaceae	herb	perennial	0.16	0.0076	0.0044	0.578947	0.727273	0.3406	77.4091	129.184	/	/	/
TP2018080202	Kobresia humilis	Cyperaceae	herb	perennial	0.154	0.011	0.005	0.454545	1.2	0.7505	150.1	66.6223	433.619	17.5363	1.8596
TP2018080202	Kobresia pygmaea	Cyperaceae	herb	perennial	0.25	0.0024	0.0008	0.333333	2	0.1376	172	58.1395	429.889	21.0874	1.31726
TP2018080202	Polygonum sibiricum	Polygonaceae	herb	perennial	0.304	0.0203333	0.005	0.245902	3.06667	1.5638	312.76	31.9734	401.015	25.097	2.2323
TP2018080203	Dracocephalum heterophyllum	Lamiaceae	herb	perennial	0.488	0.1195	0.0245	0.205021	3.87755	3.27889	133.832	74.7203	366.962	24.4745	1.29032
TP2018080203	Kobresia pygmaea	Cyperaceae	herb	perennial	0.21	0.0026	0.001	0.384615	1.6	0.169067	169.067	59.1483	440.394	20.3822	1.06508
TP2018080203	Oxytropis kansuensis	Fabaceae	herb	perennial	0.244	0.0136667	0.00433333	0.317073	2.15385	0.70375	162.404	61.5749	408.447	31.2962	1.73767
TP2018080203	Aster flaccidus	Asteraceae	herb	perennial	0.426	0.102	0.022	0.215686	3.63636	2.81653	128.024	78.1104	380.247	24.2144	1.45426
TP2018080203	Polygonum viviparum	Polygonaceae	herb	perennial	0.264	0.24	0.06	0.25	3	7.5552	125.92	79.4155	422.853	27.0032	2.10276
TP2018080301	Anaphalis flavescens	Asteraceae	herb	perennial	0.386	0.053	0.0176667	0.333333	2	2.8487	161.247	62.0166	437.272	17.7988	1.29835
TP2018080301	Potentilla saundersiana	Rosaceae	herb	perennial	0.216	0.046	0.02	0.434783	1.3	2.4719	123.595	80.9094	422.279	18.8817	1.12349
TP2018080301	Kobresia pygmaea	Cyperaceae	herb	perennial	0.384	0.0013	0.0007	0.538462	0.857143	0.08185	116.929	85.5223	442.484	16.2868	0.774992
TP2018080301	Gentiana straminea	Gentianaceae	herb	perennial	0.532	1.166	0.31	0.265866	2.76129	11.8788	38.3187	260.969	429.864	20.2727	1.23531
TP2018080302	Kobresia humilis	Cyperaceae	herb	perennial	0.798	0.038	0.0174	0.457895	1.18391	1.6685	95.8908	104.285	430.905	21.6872	1.21875
TP2018080302	Kobresia pygmaea	Cyperaceae	herb	perennial	0.448	0.0026	0.0013	0.5	1	0.2013	154.846	64.5802	453.654	17.703	1.42269
TP2018080302	Oxytropis kansuensis	Fabaceae	herb	perennial	0.104	0.0062	0.0022	0.354839	1.81818	0.3573	162.409	61.5729	/	/	/
TP2018080303	Lagotis brachystachya	Plantaginaceae	herb	perennial	0.524	0.161	0.04	0.248447	3.025	3.4596	86.49	115.62	434.113	25.0798	1.64778
TP2018080303	Kobresia pygmaea	Cyperaceae	herb	perennial	0.316	0.0025	0.0012	0.48	1.08333	0.1459	121.583	82.2481	431.288	22.826	1.6229
TP2018080303	Lancea tibetica	Mazaceae	herb	perennial	0.37	0.082	0.0235	0.286585	2.48936	2.71455	115.513	86.5705	453.505	17.7618	1.39738
TP2018080303	Leontopodium pusillum	Asteraceae	herb	perennial	0.344	0.0052	0.002	0.384615	1.6	0.3275	163.75	61.0687	409.044	15.3096	1.25158
TP2018080303	Saussurea arenaria	Asteraceae	herb	perennial	0.372	0.172	0.062	0.360465	1.77419	5.7975	93.5081	106.943	398.556	22.8184	1.45976
TP2018080401	Ajuga lupulina	Lamiaceae	herb	perennial	0.314	0.251	0.065	0.258964	2.86154	8.5257	131.165	76.2401	411.893	27.9078	1.92728
TP2018080401	Lamiophlomis rotata	Lamiaceae	herb	perennial	0.456	3.962	0.83	0.20949	3.77349	62.4	75.1807	133.013	419.726	24.1996	1.55002
TP2018080401	Lagotis brachystachya	Plantaginaceae	herb	perennial	0.448	0.1745	0.045	0.25788	2.87778	4.35236	96.719	103.392	428.766	24.1743	1.73344
TP2018080401	Kobresia pygmaea	Cyperaceae	herb	perennial	0.366	0.0022	0.001	0.454545	1.2	0.211579	211.579	47.2637	419.478	20.805	1.7063
TP2018080401	Pedicularis kansuensis	Orobanchaceae	herb	annual	0.19	0.0017	0.0005	0.294118	2.4	0.0939	187.8	53.2481	404.007	20.5046	2.36671
TP2018080401	Potentilla anserina	Rosaceae	herb	perennial	0.162	0.013	0.00466667	0.358974	1.78571	1.0709	229.479	43.5771	411.868	25.2357	1.78708
TP2018080401	Elsholtzia densa	Lamiaceae	herb	perennial	0.24	0.0295	0.0075	0.254237	2.93333	1.8301	244.013	40.9814	386.424	34.9934	1.92507
TP2018080402	Kobresia humilis	Cyperaceae	herb	perennial	0.548	0.0105	0.0043	0.409524	1.44186	0.59975	139.477	71.6965	401.853	19.1485	0.855975
TP2018080402	Kobresia pygmaea	Cyperaceae	herb	perennial	0.098	0.0013	0.0005	0.384615	1.6	0.12825	256.5	38.9864	414.974	20.9563	0.99418
TP2018080402	Potentilla anserina	Rosaceae	herb	perennial	0.176	0.01	0.00266667	0.266667	2.75	0.7572	283.95	35.2175	402.717	18.8865	1.45418
TP2018080403	Lamiophlomis rotata	Lamiaceae	herb	perennial	1.58	4.714	1.188	0.252015	2.96801	73.5195	61.8851	161.59	371.194	19.758	1.30495
TP2018080403	Aster flaccidus	Asteraceae	herb	perennial	0.342	0.072	0.018	0.25	3	2.1397	118.872	84.1239	383.714	20.3225	1.54919
TP2018080403	Kobresia littledalei	Cyperaceae	herb	perennial	0.5	0.0136	0.0068	0.5	1	0.9621	141.485	70.6787	397.277	20.8618	0.920809
TP2018080403	Polygonum viviparum	Polygonaceae	herb	perennial	0.4	0.146	0.0476667	0.326484	2.06294	6.1479	128.977	77.5332	416.966	24.6277	1.6476
TP2018080404	Acomastylis elata var. humilis	Rosaceae	herb	perennial	0.188	0.0072	0.0032	0.444444	1.25	0.490667	153.333	65.2174	415.483	23.5316	1.45597
TP2018080404	Kobresia pygmaea	Cyperaceae	herb	perennial	0.244	0.006	0.0032	0.533333	0.875	0.250429	78.2589	127.781	428.49	19.5178	1.53172
TP2018080404	Kobresia cuneata	Cyperaceae	herb	perennial	0.288	0.117	0.0535	0.457265	1.18692	7.2208	134.968	74.0915	406.599	24.6034	1.44872
TP2018080404	Polygonum hookeri	Polygonaceae	herb	perennial	0.328	0.230333	0.043	0.186686	4.35659	7.79773	181.343	55.1442	398.739	28.8854	1.85546
TP2018080404	Polygonum macrophyllum	Polygonaceae	herb	perennial	0.284	0.0545	0.022	0.40367	1.47727	2.0748	94.3091	106.034	412.751	29.8738	1.93671
TP2018080405	Caragana jubata	Fabaceae	shrub	deciduous	0.578	0.0057	0.0024	0.421053	1.375	0.3408	142	70.4225	449.384	30.6726	1.35687
TP2018080405	Potentilla fruticosa	Rosaceae	shrub	deciduous	0.238	0.0234	0.0124	0.529915	0.887097	1.58386	127.73	78.2899	431.451	23.8457	2.17292
TP2018080405	Salix oritrepha	Salicaceae	shrub	deciduous	0.24	0.0842105	0.0352632	0.41875	1.38806	3.88121	110.064	90.8561	460.809	29.1908	1.66529
TP2018080405	Polygonum macrophyllum	Polygonaceae	herb	perennial	0.334	0.249	0.0735	0.295181	2.38776	11.9427	162.486	61.5439	398.033	25.7252	1.48333
TP2018080501	Ribes orientale	Grossulariaceae	shrub	deciduous	0.184	0.062	0.0215	0.346774	1.88372	4.89839	227.832	43.892	419.142	22.6993	1.74725
TP2018080501	Lonicera hispida	Caprifoliaceae	shrub	deciduous	0.202	0.2295	0.0825	0.359477	1.78182	13.3009	161.223	62.0259	433.232	23.5153	1.4374
TP2018080501	Stellera chamaejasme	Thymelaeaceae	herb	perennial	0.234	0.0154	0.0048	0.311688	2.20833	0.9035	188.229	53.1267	413.053	40.0313	2.50637
TP2018080501	Juniperus convallium	Cupressaceae	tree	evergreen	1.072	0.0143	0.0075	0.524476	0.906667	0.25295	33.7267	296.501	516.539	11.3562	1.11625
TP2018080501	Berberis dictyoneura	Berberidaceae	shrub	deciduous	0.24	0.0825	0.0325	0.393939	1.53846	3.951	121.569	82.2577	411.321	19.8428	1.24409
TP2018080501	Spiraea myrtilloides	Rosaceae	shrub	deciduous	0.134	0.0036	0.0021	0.583333	0.714286	0.3927	187	53.4759	469.168	27.4773	1.46895
TP2018080501	Lonicera rupicola	Caprifoliaceae	shrub	deciduous	0.222	0.011	0.0049	0.445455	1.2449	0.615905	125.695	79.5578	467.716	22.3382	1.19696
TP2018080501	Polygonum macrophyllum	Polygonaceae	herb	perennial	0.378	0.276667	0.0656667	0.237349	3.2132	11.1321	169.524	58.9886	414.508	29.789	1.89431
TP2018080502	Anaphalis flavescens	Asteraceae	herb	perennial	0.256	0.0685	0.0225	0.328467	2.04444	3.2038	142.391	70.2291	453.654	14.5635	1.36689
TP2018080502	Kobresia pygmaea	Cyperaceae	herb	perennial	0.246	0.0011	0.0006	0.545455	0.833333	0.1053	175.5	56.9801	412.471	15.0531	1.05734
TP2018080502	Ligularia virgaurea	Asteraceae	herb	perennial	0.496	1.109	0.234	0.211001	3.73932	26.5392	113.415	88.1715	432.786	15.5212	1.17217
TP2018080503	Pterocephalus hookeri	Caprifoliaceae	herb	perennial	0.454	0.284444	0.0733333	0.257812	2.87879	6.85633	93.4955	106.957	421.818	15.6926	1.24821
TP2018080503	Caragana erinacea	Fabaceae	shrub	deciduous	0.192	0.0037	0.0015	0.405405	1.46667	0.231867	154.578	64.6924	436.422	23.4066	1.37757
TP2018080503	Artemisia moorcroftiana	Asteraceae	herb	perennial	0.174	0.00866667	0.003	0.346154	1.88889	0.498533	166.178	60.1765	409.669	24.1217	1.78911
TP2018080601	Caragana versicolor	Fabaceae	shrub	deciduous	0.064	0.0008	0.0003	0.375	1.66667	0.06736	224.533	44.5368	439.918	25.8829	1.23023
TP2018080601	Ribes orientale	Grossulariaceae	shrub	deciduous	0.302	0.143	0.0475	0.332168	2.01053	9.6877	203.952	49.0312	436.041	22.6201	2.16056
TP2018080601	Spiraea alpina	Rosaceae	shrub	deciduous	0.116	0.0044	0.0021	0.477273	1.09524	0.388647	185.07	54.0336	464.608	19.4294	1.25724
TP2018080601	Lonicera hispida	Caprifoliaceae	shrub	deciduous	0.416	0.139333	0.055	0.394737	1.53333	10.8084	196.516	50.8863	420.981	18.5637	1.3188
TP2018080601	Potentilla fruticosa	Rosaceae	shrub	deciduous	0.284	0.0019	0.001	0.526316	0.9	0.130952	130.952	76.3636	411.207	16.5388	1.57142
TP2018080601	Juniperus convallium	Cupressaceae	tree	evergreen	0.914	0.0191	0.0099	0.518325	0.929293	0.3743	37.8081	264.494	496.623	9.44323	0.943456
TP2018080601	Salix oritrepha	Salicaceae	shrub	deciduous	0.254	0.066	0.0295	0.44697	1.23729	3.06944	104.049	96.1086	443.522	22.4745	1.63928
TP2018080601	Spiraea myrtilloides	Rosaceae	shrub	deciduous	0.194	0.0076	0.004	0.526316	0.9	0.471278	117.819	84.8756	449.05	19.9603	1.27847
TP2018080601	Berberis diaphana	Berberidaceae	shrub	deciduous	0.188	0.009	0.0046	0.511111	0.956522	0.5742	124.826	80.1115	431.247	18.5713	1.213
TP2018080601	Lonicera rupicola	Caprifoliaceae	shrub	deciduous	0.33	0.033	0.0153333	0.464646	1.15217	1.561	101.804	98.2276	424.3	24.4541	1.8358
TP2018080601	Potentilla glabra	Rosaceae	shrub	deciduous	0.412	0.0033	0.0021	0.636364	0.571429	0.676333	322.063	31.0498	403.085	15.2341	0.931536
TP2018080601	Sibiraea angustata	Rosaceae	shrub	deciduous	0.196	0.092	0.039	0.423913	1.35897	4.838	124.051	80.6118	428.714	18.7683	1.41404
TP2018080701	Juniperus tibetica	Cupressaceae	tree	evergreen	1.138	0.0162	0.0084	0.518519	0.928571	0.311432	37.0752	269.722	524.391	9.82141	1.044
TP2018080701	Ribes orientale	Grossulariaceae	shrub	deciduous	0.36	0.2765	0.0855	0.309222	2.23392	17.413	203.661	49.1012	425.347	21.6599	1.52384
TP2018080701	Lonicera hispida	Caprifoliaceae	shrub	deciduous	0.354	0.057	0.0245	0.429825	1.32653	2.86295	116.855	85.5761	456.488	20.3541	1.39434
TP2018080701	Lonicera trichosantha	Caprifoliaceae	shrub	deciduous	0.184	0.041	0.018	0.439024	1.27778	2.49325	138.514	72.1949	483.478	23.97	1.67557
TP2018080701	Ribes pseudofasciculatum	Grossulariaceae	shrub	deciduous	0.162	0.049	0.021	0.428571	1.33333	3.19158	151.98	65.7981	430.283	19.3493	1.76922
TP2018080701	Berberis dictyoneura	Berberidaceae	shrub	deciduous	0.29	0.077	0.0276667	0.359307	1.78313	3.19559	115.503	86.5778	438.443	20.4342	1.35783
TP2018080701	Spiraea myrtilloides	Rosaceae	shrub	deciduous	0.12	0.0045	0.0028	0.622222	0.607143	0.46	164.286	60.8696	461.147	23.3352	1.58427
TP2018080701	Berberis diaphana	Berberidaceae	shrub	deciduous	0.156	0.0112	0.0046	0.410714	1.43478	0.95305	207.185	48.2661	/	/	/
TP2018080701	Lonicera rupicola	Caprifoliaceae	shrub	deciduous	0.27	0.0315	0.0135	0.428571	1.33333	1.5298	113.319	88.2468	455.415	21.9081	1.86719
TP2018080701	Sibiraea angustata	Rosaceae	shrub	deciduous	0.358	0.1205	0.0485	0.40249	1.48454	6.005	123.814	80.766	440.18	21.4708	1.84256
TP2018080702	Pterocephalus hookeri	Caprifoliaceae	herb	perennial	0.36	0.548	0.125	0.228102	3.384	11.7373	93.8983	106.498	424.814	13.1796	1.37277
TP2018080702	Stellera chamaejasme	Thymelaeaceae	herb	perennial	0.224	0.0246667	0.00766667	0.310811	2.21739	1.16725	152.25	65.6814	403.207	28.5559	1.95339
TP2018080702	Kobresia setschwanensis	Cyperaceae	herb	perennial	0.712	0.024	0.0108	0.45	1.22222	1.45986	135.172	73.9798	417.906	13.1879	0.888347
TP2018080702	Polygonum macrophyllum	Polygonaceae	herb	perennial	0.28	0.327	0.094	0.287462	2.47872	13.6563	145.28	68.8325	402.579	23.271	1.50941
TP2018080702	Achnatherum duthiei	Poaceae	herb	perennial	0.238	0.008	0.0036	0.45	1.22222	0.48725	135.347	73.884	428.233	14.4073	1.20444
TP2018080703	Picea likiangensis var. rubescens	Pinaceae	tree	evergreen	1.08	0.0147	0.0065	0.442177	1.26154	0.323686	49.7978	200.812	476.397	9.621	1.11408
TP2018080703	Juniperus tibetica	Cupressaceae	tree	evergreen	1.208	0.0136	0.0066	0.485294	1.06061	0.25412	38.503	259.72	527.025	12.1287	1.18652
TP2018080703	Cotoneaster acutifolius	Rosaceae	shrub	deciduous	0.182	0.082	0.0335	0.408537	1.44776	4.81735	143.801	69.5403	431.088	20.5287	1.26291
TP2018080703	Berberis diaphana	Berberidaceae	shrub	deciduous	0.196	0.021	0.0086	0.409524	1.44186	1.07455	124.948	80.0335	454.721	21.0244	1.2407
TP2018080801	Lamiophlomis rotata	Lamiaceae	herb	perennial	1.424	2.13	0.572	0.268545	2.72378	36.6544	64.0811	156.052	393.491	16.2772	1.12148
TP2018080801	Kobresia pygmaea	Cyperaceae	herb	perennial	0.262	0.0016	0.0007	0.4375	1.28571	0.1109	158.429	63.1199	428.766	18.5245	0.965196
TP2018080801	Ligularia virgaurea	Asteraceae	herb	perennial	0.468	2.24	0.662	0.295536	2.38369	49.847	75.2976	132.806	406.538	14.5959	0.959094
TP2018080802	Thermopsis alpina	Fabaceae	herb	perennial	0.358	0.026	0.00866667	0.333333	2	1.33513	154.054	64.9124	447.636	24.1696	1.29195
TP2018080802	Stellera chamaejasme	Thymelaeaceae	herb	perennial	0.196	0.0136	0.0052	0.382353	1.61538	0.8486	163.192	61.2774	415.621	24.796	1.49646
TP2018080802	Spenceria ramalana	Rosaceae	herb	perennial	0.23	0.0193333	0.00866667	0.448276	1.23077	1.0935	126.173	79.2562	394.256	16.1388	1.36316
TP2018080802	Achnatherum duthiei	Poaceae	herb	perennial	0.19	0.0064	0.0043	0.671875	0.488372	0.5041	117.233	85.3005	420.109	13.0698	1.10329
TP2018080802	Sibiraea angustata	Rosaceae	shrub	deciduous	0.29	0.046	0.0195	0.423913	1.35897	2.5273	129.605	77.1574	454.531	21.3406	2.45473
TP2018080803	Kobresia pygmaea	Cyperaceae	herb	perennial	0.068	0.0028	0.0012	0.428571	1.33333	0.2171	180.917	55.2741	409.706	18.3636	1.32986
TP2018080803	Saussurea leontodontoides	Asteraceae	herb	perennial	0.718	0.766667	0.178333	0.232609	3.29907	9.6677	54.2114	184.463	413.939	18.9634	1.37171
TP2018080803	Achnatherum duthiei	Poaceae	herb	perennial	0.368	0.0034375	0.0015625	0.454545	1.2	0.2934	187.776	53.2549	/	/	/
TP2018080901	Artemisia stechmanniana	Asteraceae	semi-shrub	perennial	0.136	0.0027	0.0012	0.444444	1.25	0.2918	243.167	41.1241	454.411	17.1138	1.6371
TP2018080901	Juniperus tibetica	Cupressaceae	tree	evergreen	0.654	0.0127	0.0074	0.582677	0.716216	0.34975	47.2635	211.58	525.704	8.47051	0.922684
TP2018080901	Rhamnus tangutica	Rhamnaceae	shrub	deciduous	0.344	0.0503333	0.0193333	0.384106	1.60345	1.89487	98.0103	102.03	/	/	/
TP2018080901	Elsholtzia fruticosa	Lamiaceae	shrub	deciduous	0.214	0.08	0.033	0.4125	1.42424	5.5265	167.47	59.7123	439.817	16.644	1.74961
TP2018080901	Wikstroemia canescens	Thymelaeaceae	shrub	deciduous	0.134	0.0246667	0.0106667	0.432432	1.3125	1.2628	118.388	84.4684	429.506	22.4888	1.47883
TP2018080901	Cotoneaster multiflorus	Rosaceae	shrub	deciduous	0.204	0.0615	0.03	0.487805	1.05	3.4408	114.693	87.189	432.459	18.282	1.23729
TP2018080901	Spiraea myrtilloides	Rosaceae	shrub	deciduous	0.088	0.004	0.002	0.5	1	0.297667	148.833	67.1892	469.872	16.7676	1.11035
TP2018080901	Syringa wardii	Oleaceae	shrub	deciduous	0.2	0.0336667	0.0143333	0.425743	1.34884	1.42425	99.3663	100.638	434.11	19.4557	1.42704
TP2018080902	Picea likiangensis var. rubescens	Pinaceae	tree	evergreen	0.316	0.0104	0.005	0.480769	1.08	0.2197	43.94	227.583	468.446	8.95871	0.966487
TP2018080902	Ribes orientale	Grossulariaceae	shrub	deciduous	0.226	0.16	0.062	0.3875	1.58065	9.255	149.274	66.9908	420.655	17.7463	1.48672
TP2018080902	Berberis dictyoneura	Berberidaceae	shrub	deciduous	0.266	0.0655	0.027	0.412214	1.42593	2.74076	101.51	98.5128	428.009	17.6073	1.16155
TP2018080902	Berberis diaphana	Berberidaceae	shrub	deciduous	0.21	0.0206667	0.0103333	0.5	1	1.0916	105.639	94.6623	465.098	17.4931	1.17859
TP2018081001	Rhododendron nivale subsp. boreale	Ericaceae	shrub	evergreen	0.416	0.0084	0.0036	0.428571	1.33333	0.3263	90.6389	110.328	479.33	16.4894	1.28858
TP2018081001	Salix oritrepha	Salicaceae	shrub	deciduous	0.256	0.055	0.0226	0.410909	1.43363	2.44565	108.215	92.409	449.227	21.7081	1.65974
TP2018081001	Rhododendron vernicosum	Ericaceae	shrub	evergreen	0.422	1.416	0.587	0.414548	1.41227	28.6864	48.8695	204.627	474.757	12.7023	1.08065
TP2018081002	Kobresia pygmaea	Cyperaceae	herb	perennial	0.264	0.0017	0.0009	0.529412	0.888889	0.11875	131.944	75.7895	400.433	15.4637	0.969212
TP2018081003	Hordeum vulgare var. coeleste	Poaceae	herb	annual	0.21	0.217	0.059	0.271889	2.67797	11.4996	194.908	51.3061	370.249	12.352	2.03497
TP2018081101	Kobresia pygmaea	Cyperaceae	herb	perennial	0.114	0.0016	0.0007	0.4375	1.28571	0.1022	146	68.4932	406.078	19.4958	0.889366
TP2018081101	Kobresia tibetica	Cyperaceae	herb	perennial	0.752	0.0242	0.01	0.413223	1.42	1.10107	110.107	90.821	397.08	18.6426	1.13198
TP2018081102	Spiraea alpina	Rosaceae	shrub	deciduous	0.086	0.0018	0.001	0.555556	0.8	0.1703	170.3	58.7199	454.682	13.823	0.848218
TP2018081102	Salvia prattii	Lamiaceae	herb	perennial	0.256	0.98	0.242	0.246939	3.04959	41.0812	169.757	58.9077	416.359	24.9269	1.5585
TP2018081102	Salix oritrepha	Salicaceae	shrub	deciduous	0.256	0.084	0.03	0.357143	1.8	3.7058	123.527	80.9542	429.957	33.1168	2.80543
TP2018081102	Lonicera rupicola	Caprifoliaceae	shrub	deciduous	0.216	0.047	0.015	0.319149	2.13333	2.8166	187.773	53.2557	406.906	30.3542	2.36689
TP2018081102	Sibiraea angustata	Rosaceae	shrub	deciduous	0.274	0.217	0.0855	0.394009	1.53801	10.2558	119.951	83.3675	420.836	32.0531	2.31207
TP2018081201	Ajuga lupulina	Lamiaceae	herb	perennial	0.36	0.169333	0.0416667	0.246063	3.064	6.45287	154.869	64.5708	374.032	22.2889	2.21522
TP2018081201	Gentiana straminea	Gentianaceae	herb	perennial	0.69	0.6545	0.132	0.201681	3.95833	11.624	88.0606	113.558	373.384	13.5431	1.82802
TP2018081201	Artemisia gmelinii	Asteraceae	semi-shrub	perennial	0.122	0.0038	0.0014	0.368421	1.71429	0.2773	198.071	50.4868	423.803	21.693	2.136
TP2018081201	Morina chinensis	Caprifoliaceae	herb	perennial	0.884	0.2425	0.0765	0.315464	2.16993	8.4224	110.097	90.8292	388.679	12.8726	1.82199
TP2018081202	Kobresia humilis	Cyperaceae	herb	perennial	0.516	0.0071	0.003	0.422535	1.36667	0.5194	173.133	57.759	402.258	24.7428	1.11007
TP2018081202	Lamiophlomis rotata	Lamiaceae	herb	perennial	0.984	2.045	0.45	0.220049	3.54444	28.9024	64.2276	155.696	359.888	18.9935	1.72901
TP2018081202	Kobresia pygmaea	Cyperaceae	herb	perennial	0.316	0.0015	0.0007	0.466667	1.14286	0.0925	132.143	75.6757	398.231	22.8307	1.03769
TP2018081203	Carduus acanthoides	Asteraceae	herb	perennial	0.762	0.948	0.176	0.185654	4.38636	25.8403	146.82	68.1106	373.384	18.5348	1.17599
TP2018081203	Aconitum gymnandrum	Ranunculaceae	herb	annual	0.232	0.05	0.0115	0.23	3.34783	2.6891	233.835	42.7652	372.965	20.3142	3.08654
TP2018081203	Salvia roborowskii	Lamiaceae	herb	perennial	0.338	0.1675	0.0415	0.247761	3.03614	9.3885	226.229	44.203	383.001	16.2409	1.72935
TP2018081203	Anisodus tanguticus	Solanaceae	herb	perennial	0.588	0.543333	0.115333	0.21227	3.71098	16.1788	140.279	71.2867	387.693	20.3823	1.62489
TP2018081203	Aster souliei	Asteraceae	herb	perennial	0.3	0.0685	0.0205	0.29927	2.34146	2.993	146	68.4932	389.952	13.242	1.26022
TP2018081301	Anemone rivularis	Ranunculaceae	herb	perennial	0.25	0.2095	0.054	0.257757	2.87963	10.1094	187.211	53.4156	368.669	22.8789	2.03453
TP2018081301	Elsholtzia densa	Lamiaceae	herb	perennial	0.146	0.017	0.00466667	0.27451	2.64286	1.2951	277.521	36.0333	/	/	/
TP2018081301	Salvia roborowskii	Lamiaceae	herb	perennial	0.202	0.2295	0.051	0.222222	3.5	18.0186	353.306	28.3041	432.014	29.5368	1.8354
TP2018081301	Potentilla plumosa	Rosaceae	herb	perennial	0.166	0.0173333	0.006	0.346154	1.88889	1.3399	223.317	44.7795	425.347	20.971	1.5665
TP2018081301	Elymus purpurascens	Poaceae	herb	perennial	0.122	0.0235	0.009	0.382979	1.61111	2.08878	232.086	43.0874	416.056	23.0402	1.79884
TP2018081301	Pedicularis chinensis	Orobanchaceae	herb	annual	0.112	0.0026	0.0009	0.346154	1.88889	0.229714	255.238	39.1791	427.109	23.7737	1.82448
TP2018081302	Saussurea arenaria	Asteraceae	herb	perennial	0.382	0.122	0.045	0.368852	1.71111	4.141	92.0222	108.669	405.498	20.7188	1.27335
TP2018081302	Hippophae tibetana	Elaeagnaceae	shrub	deciduous	0.15	0.0065	0.0025	0.384615	1.6	0.332133	132.853	75.271	466.987	35.7858	1.75757
TP2018081302	Morina chinensis	Caprifoliaceae	herb	perennial	0.512	0.489	0.158	0.323108	2.09494	11.5545	73.1297	136.743	413.445	19.131	1.03769
TP2018081303	Kobresia pygmaea	Cyperaceae	herb	perennial	0.304	0.0018	0.0008	0.444444	1.25	0.1497	187.125	53.4402	426.81	29.0024	2.12362
TP2018081303	Kobresia tibetica	Cyperaceae	herb	perennial	0.73	0.0184	0.0078	0.423913	1.35897	0.999	128.077	78.0781	415.483	26.5764	1.21478
TP2018081401	Kobresia pygmaea	Cyperaceae	herb	perennial	0.324	0.003	0.0015	0.5	1	0.1827	121.8	82.1018	409.584	25.5841	1.01188
TP2018081402	Kobresia humilis	Cyperaceae	herb	perennial	0.164	0.0202	0.0078	0.386139	1.58974	1.0002	128.231	77.9844	423.225	25.9221	1.19807
TP2018081402	Kobresia pygmaea	Cyperaceae	herb	perennial	0.368	0.0025	0.0011	0.44	1.27273	0.1673	152.091	65.7501	426.968	26.0915	1.0959
TP2018081402	Kobresia littledalei	Cyperaceae	herb	perennial	0.938	0.0392	0.018	0.459184	1.17778	1.53173	85.0963	117.514	420.61	25.708	0.862953
TP2018081501	Stipa sareptana var. krylovii	Poaceae	herb	perennial	0.064	0.005	0.0028	0.56	0.785714	0.312353	111.555	89.6422	415.441	13.8164	0.559039
TP2018081502	Kobresia pygmaea	Cyperaceae	herb	perennial	0.118	0.0018	0.0008	0.444444	1.25	0.1371	171.375	58.3516	426.185	22.024	1.49376
TP2018081502	Callianthemum pimpinelloides	Ranunculaceae	herb	perennial	0.386	0.0343333	0.004	0.116505	7.58333	1.2442	311.05	32.1492	383.523	21.1015	1.11706
TP2018081502	Leontopodium pusillum	Asteraceae	herb	perennial	0.108	0.0054	0.002	0.37037	1.7	0.279667	139.833	71.5137	324.951	18.466	1.12214
TP2018081502	Stipa sareptana var. krylovii	Poaceae	herb	perennial	0.062	0.0032	0.0018	0.5625	0.777778	0.267933	148.852	67.1809	416.393	20.1928	0.736864
TP2018081503	Carex schneideri	Cyperaceae	herb	perennial	0.792	0.0408	0.0166	0.406863	1.45783	1.7386	104.735	95.4791	417.143	24.0403	1.32633
TP2018081503	Kobresia pygmaea	Cyperaceae	herb	perennial	0.072	0.003	0.0015	0.5	1	0.1734	115.6	86.5052	419.125	20.9955	1.034
TP2018081601	Kobresia pygmaea	Cyperaceae	herb	perennial	0.252	0.0019	0.0008	0.421053	1.375	0.12855	160.688	62.2326	420.886	23.5818	1.01652
TP2018081601	Stipa sareptana var. krylovii	Poaceae	herb	perennial	0.186	0.002	0.0013	0.65	0.538462	0.18245	140.346	71.2524	409.379	20.7117	0.813398
TP2018081602	Leontopodium pusillum	Asteraceae	herb	perennial	0.244	0.0122	0.0038	0.311475	2.21053	0.65795	173.145	57.7551	319.639	10.5255	0.923357
TP2018081602	Stipa sareptana var. krylovii	Poaceae	herb	perennial	0.194	0.0039	0.0022	0.564103	0.772727	0.1759	79.9545	125.071	415.098	12.6178	0.77595
TP2018081701	Littledalea przevalskyi	Poaceae	herb	perennial	0.27	0.0975	0.038	0.389744	1.56579	4.1501	109.213	91.5641	425.833	22.6503	1.28529
TP2018081701	Juncus thomsonii	Juncaceae	herb	perennial	0.304	0.0127	0.0054	0.425197	1.35185	0.6252	115.778	86.3724	401.837	15.8729	1.07796
TP2018081701	Allium carolinianum	Amaryllidaceae	herb	perennial	0.55	0.503	0.11	0.218688	3.57273	8.3224	75.6582	132.173	390.254	21.0274	1.36375
TP2018081702	Carex kansuensis	Cyperaceae	herb	perennial	0.338	0.057	0.0218	0.382456	1.61468	1.9136	87.7798	113.921	421.664	19.0347	1.05346
TP2018081702	Stipa sareptana var. krylovii	Poaceae	herb	perennial	0.232	0.0042	0.002	0.47619	1.1	0.21225	106.125	94.2285	421.789	16.4523	0.970563
TP2018081703	Kobresia macrantha	Cyperaceae	herb	perennial	0.342	0.0056	0.002	0.357143	1.8	0.298	149	67.1141	428.179	17.5059	0.959857
TP2018081703	Kobresia kansuensis	Cyperaceae	herb	perennial	0.148	0.0086	0.0038	0.44186	1.26316	0.452	118.947	84.0708	423.239	21.2638	1.1183
TP2018081703	Kobresia tibetica	Cyperaceae	herb	perennial	0.358	0.0194	0.0084	0.43299	1.30952	1.1596	138.048	72.4388	407.96	25.1804	1.44612
TP2018081704	Potentilla bifurca var. humilior	Rosaceae	herb	perennial	0.132	0.0056	0.0022	0.392857	1.54545	0.39805	180.932	55.2694	397.781	21.6736	1.46287
TP2018081704	Euphorbia kozlovii	Euphorbiaceae	herb	perennial	0.236	0.082	0.021	0.256098	2.90476	4.6224	220.114	45.4309	388.007	18.9822	1.19928
TP2018081704	Stipa purpurea	Poaceae	herb	perennial	0.06	0.0062	0.0032	0.516129	0.9375	0.21985	68.7031	145.554	417.81	13.8523	1.04962
TP2019070701	Kobresia humilis	Cyperaceae	herb	perennial	0.2	0.013	0.0058	0.446154	1.24138	0.76048	131.117	76.2676	424.3	24.4344	2.06182
TP2019070701	Kobresia pusilla	Cyperaceae	herb	perennial	0.8	0.0096	0.0046	0.479167	1.08696	0.444385	96.6054	103.514	443.586	24.687	1.88735
TP2019070801	Lamiophlomis rotata	Lamiaceae	herb	perennial	0.9	2.6	0.398	0.153077	5.53266	27.7602	69.7492	143.371	427.073	26.5661	2.92475
TP2019070801	Microula tibetica	Boraginaceae	herb	perennial	0.2	0.56	0.0855	0.152679	5.54971	11.1005	129.831	77.0233	383.238	38.4231	5.07763
TP2019070801	Potentilla parvifolia	Rosaceae	shrub	deciduous	0.3	0.0005	0.0003	0.6	0.666667	0.10196	339.867	29.4233	462.918	24.3014	2.05999
TP2019070801	Kobresia pygmaea	Cyperaceae	herb	perennial	0.4	0.001	0.0004	0.4	1.5	0.0752818	188.205	53.1337	394.188	23.8445	2.01002
TP2019070901	Carex montis-everesti	Cyperaceae	herb	perennial	0.6	0.0094	0.0044	0.468085	1.13636	0.40832	92.8	107.759	434.776	20.3769	1.0927
TP2019070901	Deyeuxia holciformis	Poaceae	herb	perennial	0.38	0.0118	0.0046	0.389831	1.56522	0.723915	157.373	63.5433	432.206	20.7404	1.41212
TP2019070901	Deyeuxia scabrescens	Poaceae	herb	perennial	0.4	0.0036	0.002	0.555556	0.8	0.2635	131.75	75.9013	437.836	16.5825	1.13769
TP2019070901	Stipa roborowskyi	Poaceae	herb	perennial	0.42	0.0076	0.004	0.526316	0.9	0.38556	96.39	103.745	443.461	15.687	0.754039
TP2019070901	Leontopodium pusillum	Asteraceae	herb	perennial	0.32	0.0032	0.0015	0.46875	1.13333	0.258295	172.197	58.0731	295.369	10.6334	0.827113
TP2019070901	Astragalus	Fabaceae	herb	perennial	0.14	0.0004	0.0003	0.75	0.333333	0.054395	135.988	73.5362	361.715	22.9442	1.10885
TP2019070901	Lagotis brachystachya	Plantaginaceae	herb	perennial	0.6	0.081	0.0245	0.302469	2.30612	1.79915	73.4347	136.175	458.139	23.7228	1.643
TP2019070901	Potentilla granulosa	Rosaceae	herb	perennial	0.5	0.0024	0.0014	0.583333	0.714286	0.127742	91.2443	109.596	416.942	29.9482	2.07911
TP2019070901	Poaceae	Poaceae	herb	perennial	0.16	0.0008	0.0002	0.25	3	0.08964	448.2	22.3115	385.339	21.2585	1.36456
TP2019070902	Oxytropis falcata	Fabaceae	herb	perennial	0.54	0.0028	0.0011	0.392857	1.54545	0.119837	108.942	91.7916	376.531	23.8564	1.41331
TP2019070902	Leontopodium pusillum	Asteraceae	herb	perennial	0.36	0.0064	0.0023	0.359375	1.78261	0.305375	132.772	75.3172	397.101	24.2206	2.79401
TP2019070902	Arenaria bryophylla	Caryophyllaceae	herb	perennial	0.4	0.0005	0.0001	0.2	4	0.0422356	422.356	23.6767	354.415	12.9332	1.25702
TP2019070902	Deyeuxia scabrescens	Poaceae	herb	perennial	0.4	0.0044	0.0022	0.5	1	0.3879	176.318	56.7156	419.505	19.0562	1.23668
TP2019070902	Poaceae	Poaceae	herb	perennial	0.44	0.003	0.0015	0.5	1	0.2932	195.467	51.1596	404.007	17.4345	1.43691
TP2019070902	Potentilla bifurca	Rosaceae	herb	perennial	0.22	0.0025	0.0013	0.52	0.923077	0.164847	126.805	78.8612	380.005	21.6558	1.56755
TP2019070902	Euphorbia altotibetica	Euphorbiaceae	herb	perennial	0.24	0.0285	0.0085	0.298246	2.35294	0.22581	26.5659	376.423	424.3	28.5457	2.56466
TP2019071001	Poaceae	Poaceae	herb	perennial	0.3	0.0036	0.0018	0.5	1	0.21604	120.022	83.3179	438.776	23.1439	1.3333
TP2019071001	Astragalus confertus	Fabaceae	herb	perennial	0.2	0.0006	0.0001	0.166667	5	0.04936	493.6	20.2593	404.366	41.6596	3.18136
TP2019071001	Incarvillea compacta	Bignoniaceae	herb	perennial	0.56	0.033	0.009	0.272727	2.66667	0.80791	89.7678	111.399	439.944	24.5449	2.08084
TP2019071001	Saussurea arenaria	Asteraceae	herb	perennial	0.64	0.0545	0.0155	0.284404	2.51613	0.88108	56.8439	175.92	371.9	24.887	2.098
TP2019071001	Leontopodium pusillum	Asteraceae	herb	perennial	0.54	0.0051	0.0015	0.294118	2.4	0.33679	224.527	44.5381	357.556	15.2768	1.15932
TP2019071001	Carex moorcroftii	Cyperaceae	herb	perennial	0.34	0.0014	0.0008	0.571429	0.75	0.140248	175.31	57.0418	359.469	16.4113	1.02224
TP2019071001	Potentilla granulosa	Rosaceae	herb	perennial	0.42	0.0019	0.0009	0.473684	1.11111	0.105678	117.42	85.1645	406.148	25.6521	1.88149
TP2019071002	Oxytropis falcata	Fabaceae	herb	perennial	0.42	0.0017	0.0005	0.294118	2.4	0.061405	122.81	81.4266	308.09	28.3773	1.25855
TP2019071002	Kobresia capillifolia	Cyperaceae	herb	perennial	0.4	0.0046	0.0024	0.521739	0.916667	0.24763	103.179	96.9188	413.396	20.4531	1.33951
TP2019071002	Carex montis-everesti	Cyperaceae	herb	perennial	0.3	0.0052	0.0032	0.615385	0.625	0.36685	114.641	87.2291	434.167	23.3871	1.20466
TP2019071002	Astragalus confertus	Fabaceae	herb	perennial	0.32	0.0007	0.0002	0.285714	2.5	0.02751	137.55	72.7008	406.863	42.5779	2.21903
TP2019071002	Leontopodium pusillum	Asteraceae	herb	perennial	0.56	0.0046	0.0018	0.391304	1.55556	0.20949	116.383	85.923	395.631	27.789	1.80185
TP2019071101	Saussurea arenaria	Asteraceae	herb	perennial	0.42	0.0575	0.0165	0.286957	2.48485	1.81531	110.019	90.8938	408.245	28.5559	2.43464
TP2019071101	Leontopodium pusillum	Asteraceae	herb	perennial	0.2	0.0042	0.0016	0.380952	1.625	0.2293	143.312	69.7776	384.521	16.9151	1.55742
TP2019071101	Kobresia pygmaea	Cyperaceae	herb	perennial	0.24	0.001	0.0006	0.6	0.666667	0.25665	427.75	23.3781	402.226	12.5355	0.648979
TP2019071101	Lancea tibetica	Mazaceae	herb	perennial	0.4	0.036	0.011	0.305556	2.27273	1.30249	118.408	84.4536	415.907	27.1178	1.9769
TP2019071101	Aster flaccidus	Asteraceae	herb	perennial	0.4	0.0275	0.006	0.218182	3.58333	0.949011	158.168	63.2237	330.126	21.7463	1.77584
TP2019071101	Kobresia schoenoides	Cyperaceae	herb	perennial	0.36	0.0095	0.0025	0.263158	2.8	0.712727	285.091	35.0765	404.333	29.5144	1.35079
TP2019071101	Kobresia royleana	Cyperaceae	herb	perennial	1.12	0.0606667	0.0193333	0.318681	2.13793	1.70618	88.2505	113.314	429.889	25.0446	1.23907
TP2019071101	Lamiophlomis rotata	Lamiaceae	herb	perennial	1.1	0.773	0.145	0.187581	4.33103	12.556	86.593	115.483	437.896	32.2043	2.21619
TP2019071102	Stipa penicillata	Poaceae	herb	perennial	0.22	0.0038	0.0016	0.421053	1.375	0.258875	161.797	61.8059	516.918	25.8666	1.47967
TP2019071102	Leontopodium pusillum	Asteraceae	herb	perennial	0.42	0.0028	0.0012	0.428571	1.33333	0.198233	165.194	60.5347	/	/	/
TP2019071102	Poaceae	Poaceae	herb	perennial	0.96	0.024	0.0106667	0.444444	1.25	0.958804	89.8879	111.25	457.913	24.1394	1.47261
TP2019071103	Stipa penicillata	Poaceae	herb	perennial	0.42	0.006	0.0028	0.466667	1.14286	0.313045	111.802	89.4439	432.528	14.7691	0.731746
TP2019071103	Oxytropis microphylla	Fabaceae	herb	perennial	1	0.0004	0.000253	0.6325	0.581028	0.030425	120.257	83.1553	380.389	33.6765	1.77954
TP2019071103	Gentiana clarkei	Gentianaceae	herb	annual	1	0.0015	0.0003	0.2	4	0.06896	229.867	43.5035	374.047	15.295	1.23899
TP2019071103	Poa nepalensis	Poaceae	herb	perennial	0.56	0.00666667	0.00333333	0.5	1	0.4318	129.54	77.1962	428.639	15.8086	0.773683
TP2019071103	Aster boweri	Asteraceae	herb	perennial	0.5	0.00733333	0.00133333	0.181818	4.5	0.335617	251.713	39.7279	304.847	28.8891	2.78354
TP2019071201	Leontopodium pusillum	Asteraceae	herb	perennial	0.3	0.0024	0.0014	0.583333	0.714286	0.35233	251.664	39.7355	/	/	/
TP2019071201	Stipa purpurea	Poaceae	herb	perennial	0.36	0.0048	0.0026	0.541667	0.846154	0.393485	151.34	66.0762	439.162	19.2732	0.892774
TP2019071201	Kobresia hohxilensis	Cyperaceae	herb	perennial	0.36	0.0048	0.0028	0.583333	0.714286	0.3998	142.786	70.035	/	/	/
TP2019071201	Rhodiola smithii	Crassulaceae	herb	perennial	1.8	0.0226	0.002	0.0884956	10.3	0.35972	179.86	55.5988	346.183	39.1748	3.10667
TP2019071201	Potentilla bifurca	Rosaceae	herb	perennial	0.22	0.0004	0.0002	0.5	1	0.133305	666.525	15.0032	383.016	15.4191	1.41968
TP2019071201	Potentilla bifurca var. humilior	Rosaceae	herb	perennial	0.38	0.0012	0.0008	0.666667	0.5	0.12446	155.575	64.2777	319.417	10.1211	0.866651
TP2019071202	Carex moorcroftii	Cyperaceae	herb	perennial	0.82	0.057	0.023	0.403509	1.47826	1.48379	64.5127	155.008	435.232	15.1512	0.751727
TP2019071202	Taraxacum tibetanum	Asteraceae	herb	perennial	0.78	0.0553333	0.0116667	0.210843	3.74286	1.95686	167.73	59.6195	394.319	22.4725	1.55417
TP2019071202	Draba oreades	Brassicaceae	herb	perennial	0.3	0.035	0.009	0.257143	2.88889	1.74233	193.593	51.6549	253.492	17.1598	1.83216
TP2019071202	Lagotis brachystachya	Plantaginaceae	herb	perennial	0.42	0.0665	0.0165	0.24812	3.0303	2.01213	121.948	82.0025	430.361	25.1194	1.221
TP2019071202	Elymus nutans	Poaceae	herb	perennial	0.76	0.0446667	0.022	0.492537	1.0303	1.42934	64.97	153.917	403.318	30.5038	1.40776
TP2019071202	Stipa purpurea	Poaceae	herb	perennial	0.38	0.0042	0.0018	0.428571	1.33333	0.366725	203.736	49.0831	395.489	11.6868	1.18236
TP2019071202	Leontopodium pusillum	Asteraceae	herb	perennial	0.46	0.003	0.0018	0.6	0.666667	0.329419	183.01	54.6417	371.026	19.8906	1.74123
TP2019071202	Astragalus arnoldii	Fabaceae	herb	perennial	1	0.0005	0.0002	0.4	1.5	0.036885	184.425	54.2226	377.73	32.0202	2.08196
TP2019071203	Potentilla parvifolia	Rosaceae	shrub	deciduous	0.1	0.0019	0.001	0.526316	0.9	0.039405	39.405	253.775	402.846	16.9224	1.69007
TP2019071203	Carex montis-everesti	Cyperaceae	herb	perennial	0.58	0.0108	0.0048	0.444444	1.25	0.72423	150.881	66.2773	387.173	20.203	1.69542
TP2019071203	Kobresia pygmaea	Cyperaceae	herb	perennial	0.46	0.0015	0.0007	0.466667	1.14286	0.108121	154.459	64.7422	398.355	29.0807	1.89884
TP2019071203	Aster flaccidus	Asteraceae	herb	perennial	0.24	0.0213333	0.00333333	0.15625	5.4	0.6777	203.31	49.186	385.425	25.4042	2.57562
TP2019071203	Myricaria	Tamaricaceae	shrub	deciduous	0.1	0.0005	0.0001	0.2	4	0.02267	226.7	44.1112	424.3	26.7359	1.57104
TP2019071301	Potentilla bifurca	Rosaceae	herb	perennial	0.38	0.0048	0.0024	0.5	1	0.352685	146.952	68.0494	410.787	30.883	2.23294
TP2019071301	Stipa purpurea	Poaceae	herb	perennial	0.58	0.0039	0.002	0.512821	0.95	0.362385	181.192	55.1899	419.45	24.6283	1.27503
TP2019071301	Leontopodium pusillum	Asteraceae	herb	perennial	0.4	0.007	0.0026	0.371429	1.69231	0.444375	170.913	58.5091	328.585	19.1383	1.20127
TP2019071301	Astragalus arnoldii	Fabaceae	herb	perennial	0.18	0.0003	0.0001	0.333333	2	0.02421	242.1	41.3052	303.361	18.3787	0.916982
TP2019071301	Saussurea andryaloides	Asteraceae	herb	perennial	0.6	0.064	0.0193333	0.302083	2.31034	1.80365	93.2922	107.19	413.758	26.0914	2.15358
TP2019071301	Rosa rugosa	Rosaceae	shrub	deciduous	0.7	0.0014	0.001	0.714286	0.4	0.170825	170.825	58.5394	378.062	31.2705	2.37967
TP2019071301	Kobresia hohxilensis	Cyperaceae	herb	perennial	0.62	0.0146	0.006	0.410959	1.43333	0.638442	106.407	93.9788	/	/	/
TP2019071302	Leontopodium pusillum	Asteraceae	herb	perennial	0.42	0.0062	0.0016	0.258065	2.875	0.27252	170.325	58.7113	399.193	16.4051	1.38986
TP2019071302	Oxytropis stracheyana	Fabaceae	herb	perennial	0.62	0.0054	0.0006	0.111111	8	0.0792	132	75.7576	418.962	21.7604	1.3125
TP2019071302	Astragalus arnoldii	Fabaceae	herb	perennial	0.1	0.0016	0.0002	0.125	7	0.035175	175.875	56.8586	388.593	26.9694	1.50921
TP2019071302	Kengyilia thoroldiana	Poaceae	herb	perennial	0.8	0.0085	0.0029	0.341176	1.93103	0.44112	152.11	65.7417	385.052	19.4055	1.92385
TP2019071302	Kobresia humilis	Cyperaceae	herb	perennial	0.6	0.0103	0.004	0.38835	1.575	0.706737	176.684	56.5982	396.186	20.3226	2.00679
TP2019071302	Carex montis-everesti	Cyperaceae	herb	perennial	0.44	0.005	0.0018	0.36	1.77778	0.335817	186.565	53.6007	394.265	17.4459	1.27466
TP2019071302	Potentilla bifurca	Rosaceae	herb	perennial	0.42	0.0066	0.002	0.30303	2.3	0.293295	146.648	68.1907	403.085	22.5264	1.98285
TP2019071401	Stipa purpurea	Poaceae	herb	perennial	0.36	0.0054	0.0024	0.444444	1.25	0.322483	134.368	74.4225	428.036	17.5842	0.902562
TP2019071401	Astragalus arnoldii	Fabaceae	herb	perennial	0.18	0.0006	0.0004	0.666667	0.5	0.04254	106.35	94.0291	397.25	35.8935	1.90575
TP2019071401	Viola kunawarensis	Violaceae	herb	perennial	0.3	0.0106	0.0028	0.264151	2.78571	0.432145	154.338	64.7931	377.315	39.0975	2.70977
TP2019071401	Dracocephalum heterophyllum	Lamiaceae	herb	perennial	0.6	0.0363333	0.00766667	0.211009	3.73913	0.996671	130.001	76.9227	383.529	36.6486	1.90961
TP2019071401	Leontopodium pusillum	Asteraceae	herb	perennial	0.64	0.0038	0.001	0.263158	2.8	0.243395	243.395	41.0855	390.463	21.6182	1.78503
TP2019071401	Euphorbia altotibetica	Euphorbiaceae	herb	perennial	0.58	0.0054	0.0016	0.296296	2.375	0.36671	229.194	43.6312	401.024	25.2315	1.87096
TP2019071401	Carex montis-everesti	Cyperaceae	herb	perennial	0.44	0.0066	0.0036	0.545455	0.833333	0.338885	94.1346	106.231	402.823	22.1634	1.31299
TP2019071501	Carex montis-everesti	Cyperaceae	herb	perennial	0.4	0.0032	0.002	0.625	0.6	0.292165	146.082	68.4545	343.04	19.2093	1.47972
TP2019071501	Stipa purpurea	Poaceae	herb	perennial	0.38	0.0028	0.002	0.714286	0.4	0.202686	101.343	98.6749	417.136	20.0275	1.29097
TP2019071501	Lamiophlomis rotata	Lamiaceae	herb	perennial	1.36	0.854	0.164	0.192037	4.20732	10.9192	66.5806	150.194	389.357	20.281	2.11474
TP2019071501	Leontopodium pusillum	Asteraceae	herb	perennial	0.42	0.005	0.0024	0.48	1.08333	0.34382	143.258	69.804	373.883	13.9597	1.14589
TP2019071501	Artemisia hedinii	Asteraceae	herb	annual	0.22	0.0012	0.000688	0.573333	0.744186	0.092835	134.935	74.11	394.925	27.549	2.60781
TP2019071502	Artemisia duthreuil-de-rhinsi	Asteraceae	herb	perennial	0.32	0.0016	0.0006	0.375	1.66667	0.0665471	110.912	90.1618	/	/	/
TP2019071502	Carex	Cyperaceae	herb	perennial	0.36	0.0066	0.0024	0.363636	1.75	0.51509	214.621	46.5938	/	/	/
TP2019071503	Poa attenuata	Poaceae	herb	perennial	0.78	0.0052	0.0026	0.5	1	0.36157	139.065	71.9086	417.042	25.9964	1.76256
TP2019071503	Arenaria bryophylla	Caryophyllaceae	herb	perennial	0.22	0.0007	0.00033	0.471429	1.12121	0.039635	120.106	83.2597	261.369	13.8276	1.49445
TP2019071503	Potentilla granulosa	Rosaceae	herb	perennial	0.42	0.0005	0.0003	0.6	0.666667	0.05932	197.733	50.5732	222.575	14.4943	1.39312
TP2019071503	Leontopodium pusillum	Asteraceae	herb	perennial	0.24	0.002	0.001232	0.616	0.623377	0.18518	150.308	66.5299	439.974	20.9819	1.83127
TP2019071503	Stipa purpurea	Poaceae	herb	perennial	0.38	0.0038	0.0018	0.473684	1.11111	0.269243	149.579	66.8541	440.052	27.4563	2.07983
TP2019071601	Carex moorcroftii	Cyperaceae	herb	perennial	0.84	0.0248	0.0116	0.467742	1.13793	1.04262	89.8815	111.258	432.43	19.168	1.38775
TP2019071601	Kobresia esenbeckii	Cyperaceae	herb	perennial	0.58	0.0122	0.0056	0.459016	1.17857	0.66795	119.277	83.8386	420.962	19.6401	1.17025
TP2019071601	Leontopodium pusillum	Asteraceae	herb	perennial	0.7	0.0078	0.0022	0.282051	2.54545	0.42377	192.623	51.915	410.51	16.7915	1.60077
TP2019071601	Lamiophlomis rotata	Lamiaceae	herb	perennial	1.62	0.638	0.108	0.169279	4.90741	9.69888	89.8044	111.353	437.087	19.6994	2.72194
TP2019071601	Kobresia pygmaea	Cyperaceae	herb	perennial	0.2	0.0012	0.0006	0.5	1	0.09736	162.267	61.627	269.095	16.9031	1.32283
TP2019071602	Leontopodium	Asteraceae	herb	perennial	0.3	0.0108	0.003	0.277778	2.6	0.63699	212.33	47.0965	433.373	19.7333	1.08924
TP2019071602	Elymus nutans	Poaceae	herb	perennial	1.2	0.064	0.0325	0.507812	0.969231	1.31695	40.5215	246.782	406.797	27.7876	1.59435
TP2019071602	Aster souliei	Asteraceae	herb	perennial	0.6	0.0365	0.0085	0.232877	3.29412	1.20213	141.427	70.7078	348.513	23.7574	1.52617
TP2019071602	Stipa purpurea	Poaceae	herb	perennial	0.32	0.0028	0.0014	0.5	1	0.21264	151.886	65.839	414.381	22.7379	0.808727
TP2019071602	Lagotis brachystachya	Plantaginaceae	herb	perennial	0.62	0.04	0.0105	0.2625	2.80952	1.15122	109.64	91.2075	393.397	21.9749	1.24292
TP2019071602	Smelowskia tibetica	Brassicaceae	herb	perennial	0.6	0.016	0.0035	0.21875	3.57143	0.597235	170.639	58.6034	287.636	24.4397	1.42094
TP2019071602	Taraxacum tibetanum	Asteraceae	herb	perennial	0.5	0.0172727	0.0122727	0.710526	0.407407	2.19037	178.475	56.0304	408.288	33.8296	2.28265
TP2019071602	Gentiana clarkei	Gentianaceae	herb	annual	0.54	0.00266667	0.000666667	0.25	3	0.19219	288.285	34.6879	406.115	24.0228	1.4025
TP2019071602	Pomatosace filicula	Primulaceae	herb	annual	0.14	0.0011	0.0001	0.0909091	10	0.06963	69.63	143.616	403.536	22.1957	1.24243
TP2019071602	Stellera chamaejasme	Thymelaeaceae	herb	perennial	0.08	0.008	0.0025	0.3125	2.2	0.5395	215.8	46.3392	/	/	/
TP2019071602	Morina chinensis	Caprifoliaceae	herb	perennial	1.14	0.27	0.084	0.311111	2.21429	4.16404	49.5719	201.727	385.727	21.1335	1.65606
TP2019071701	Leontopodium pusillum	Asteraceae	herb	perennial	0.32	0.0056	0.0014	0.25	3	0.320555	228.968	43.6743	408.734	20.5627	1.55134
TP2019071701	Astragalus arnoldii	Fabaceae	herb	perennial	0.14	0.0008	0.0002	0.25	3	0.06905	345.25	28.9645	392.287	39.2063	2.43188
TP2019071701	Arenaria roborowskii	Caryophyllaceae	herb	perennial	0.12	0.0004	0.0001	0.25	3	0.0562867	562.867	17.7662	388.989	25.6909	2.81599
TP2019071701	Kobresia pygmaea	Cyperaceae	herb	perennial	0.44	0.0018	0.0008	0.444444	1.25	0.1655	206.875	48.3384	399.227	30.1406	2.48634
TP2019071701	Artemisia hedinii	Asteraceae	herb	annual	0.12	0.0004	0.0002	0.5	1	0.0834647	417.324	23.9622	431.152	27.6863	2.68154
TP2019071701	Aster boweri	Asteraceae	herb	perennial	0.22	0.0125	0.003	0.24	3.16667	0.535135	178.378	56.0606	239.389	19.7012	1.51439
TP2019071701	Leontopodium pusillum	Asteraceae	herb	perennial	0.42	0.007	0.0005	0.0714286	13	0.212925	425.85	23.4824	238.203	22.4978	1.54528
TP2019071701	Oreosolen wattii	Scrophulariaceae	herb	perennial	0.88	0.266	0.05	0.18797	4.32	4.93374	98.6748	101.343	420.564	22.4054	3.05162
TP2019071702	Oreosolen wattii	Scrophulariaceae	herb	perennial	0.36	0.276	0.064	0.231884	3.3125	5.38994	84.2178	118.74	404.095	24.5678	3.30467
TP2019071702	Saussurea andryaloides	Asteraceae	herb	perennial	0.54	0.055	0.017	0.309091	2.23529	1.73272	101.925	98.1117	389.686	29.0154	2.87755
TP2019071702	Carex moorcroftii	Cyperaceae	herb	perennial	0.66	0.0183333	0.0103333	0.563636	0.774194	0.91005	88.0694	113.547	438.788	17.9588	1.31522
TP2019071702	Kengyilia thoroldiana	Poaceae	herb	perennial	1.22	0.0468	0.0158	0.337607	1.96203	2.51525	159.193	62.8168	/	/	/
TP2019071702	Leontopodium pusillum	Asteraceae	herb	perennial	0.4	0.00866667	0.003	0.346154	1.88889	0.589695	196.565	50.8738	357.14	19.9624	1.83682
TP2019071702	Aster boweri	Asteraceae	herb	perennial	0.24	0.0106667	0.00233333	0.21875	3.57143	0.34355	147.236	67.9183	317.888	23.0692	2.30904
TP2019071702	Astragalus arnoldii	Fabaceae	herb	perennial	0.12	0.0019	0.0002	0.105263	8.5	0.045815	229.075	43.6538	300.021	34.7283	2.37341
TP2019071702	Oxytropis sericopetala	Fabaceae	herb	perennial	0.9	0.00733333	0.001	0.136364	6.33333	0.18695	186.95	53.4902	405.83	28.916	1.69153
TP2019071702	Youngia gracilipes	Asteraceae	herb	perennial	0.28	0.0295	0.007	0.237288	3.21429	1.06688	152.411	65.6119	346.819	13.6501	2.09187
TP2019071702	Stipa purpurea	Poaceae	herb	perennial	0.56	0.0066	0.0022	0.333333	2	0.223847	101.749	98.2813	410.434	13.835	1.35675
TP2019071801	Stipa purpurea	Poaceae	herb	perennial	0.3	0.0036	0.0018	0.5	1	0.228643	127.024	78.7254	428.516	17.7689	0.987078
TP2019071801	Oxytropis sericopetala	Fabaceae	herb	perennial	0.56	0.01	0.00233333	0.233333	3.28571	0.36007	154.316	64.8022	351.562	29.2189	1.46499
TP2019071801	Astragalus arnoldii	Fabaceae	herb	perennial	0.16	0.0011	0.0001	0.0909091	10	0.04787	478.7	20.8899	317.108	24.3109	1.47825
TP2019071801	Oxytropis microphylla	Fabaceae	herb	perennial	0.64	0.0007	0.0003	0.428571	1.33333	0.048265	160.883	62.1568	237.824	17.7309	1.18558
TP2019071801	Aster boweri	Asteraceae	herb	perennial	0.56	0.00366667	0.000333333	0.0909091	10	0.120955	362.865	27.5585	298.408	21.109	1.16921
TP2019071802	Potentilla bifurca	Rosaceae	herb	perennial	0.36	0.002	0.001	0.5	1	0.127128	127.128	78.6611	371.074	20.4291	1.60559
TP2019071802	Hippophae tibetana	Elaeagnaceae	shrub	deciduous	0.22	0.009	0.00133333	0.148148	5.75	0.160845	120.634	82.8955	449.874	39.0996	1.9655
TP2019071802	Stipa roborowskyi	Poaceae	herb	perennial	0.3	0.0034	0.001	0.294118	2.4	0.140283	140.283	71.2843	411.442	25.2613	1.23985
TP2019071802	Astragalus arnoldii	Fabaceae	herb	perennial	0.16	0.0026	0.0004	0.153846	5.5	0.063735	159.338	62.7599	345.202	31.6563	2.20804
TP2019071802	Rhodiola smithii	Crassulaceae	herb	perennial	1.5	0.0286667	0.002	0.0697674	13.3333	0.31324	156.62	63.8488	325.72	36.8128	2.73739
TP2019071802	Sibbaldia adpressa	Rosaceae	herb	perennial	0.14	0.0028	0.001	0.357143	1.8	0.14942	149.42	66.9254	204.068	14.6889	1.15473
TP2019071802	Leontopodium	Asteraceae	herb	perennial	0.18	0.0058	0.0016	0.275862	2.625	0.357625	223.516	44.7396	421.176	20.9974	1.78004
TP2019071802	Lagotis brachystachya	Plantaginaceae	herb	perennial	0.5	0.0366667	0.00766667	0.209091	3.78261	0.766905	100.031	99.9689	380.967	23.9191	2.23348
TP2019071803	Leontopodium	Asteraceae	herb	perennial	0.16	0.00866667	0.00166667	0.192308	4.2	0.29498	176.988	56.501	412.419	20.184	1.4599
TP2019071803	Stipa roborowskyi	Poaceae	herb	perennial	0.32	0.0068	0.0022	0.323529	2.09091	0.209875	95.3977	104.824	430.687	19.71	1.12517
TP2019071803	Saussurea andryaloides	Asteraceae	herb	perennial	0.82	0.0506667	0.0143333	0.282895	2.53488	1.29392	90.2735	110.774	416.672	33.0202	2.42245
TP2019071803	Dracocephalum heterophyllum	Lamiaceae	herb	perennial	0.9	0.0293333	0.005	0.170455	4.86667	0.61315	122.63	81.5461	383.979	29.6415	1.94215
TP2019071901	Stipa roborowskyi	Poaceae	herb	perennial	0.5	0.00633333	0.003	0.473684	1.11111	0.183913	61.3044	163.12	441.786	26.0318	1.62892
TP2019071901	Phyllolobium heydei	Fabaceae	semi-shrub	perennial	0.48	0.0008	0.0002	0.25	3	0.04946	247.3	40.4367	339.906	27.0803	1.76324
TP2019071901	Oxytropis sericopetala	Fabaceae	herb	perennial	0.54	0.00333333	0.00133333	0.4	1.5	0.16585	124.388	80.3939	385.022	23.4904	1.47473
TP2019071901	Aster boweri	Asteraceae	herb	perennial	0.14	0.006	0.002	0.333333	2	0.253825	126.912	78.7944	359.668	27.0289	2.11405
TP2019071901	Potentilla bifurca	Rosaceae	herb	perennial	0.36	0.005	0.00266667	0.533333	0.875	0.250883	94.0812	106.291	311.474	17.5841	1.23222
TP2019071902	Artemisia duthreuil-de-rhinsi	Asteraceae	herb	perennial	0.34	0.00666667	0.00166667	0.25	3	0.228473	137.084	72.948	413.564	27.2244	2.64419
TP2019071902	Stipa roborowskyi	Poaceae	herb	perennial	0.42	0.00533333	0.00233333	0.4375	1.28571	0.227153	97.3514	102.721	439.107	29.1331	2.08088
TP2019071902	Phyllolobium heydei	Fabaceae	semi-shrub	perennial	0.44	0.0006	0.0001	0.166667	5	0.054645	546.45	18.2999	241.8	25.3734	1.4456
TP2019071903	Saussurea andryaloides	Asteraceae	herb	perennial	0.52	0.0476667	0.0166667	0.34965	1.86	1.72552	103.531	96.5891	413.887	30.9067	2.14382
TP2019071903	Leontopodium	Asteraceae	herb	perennial	0.56	0.00966667	0.003	0.310345	2.22222	0.41023	136.743	73.1297	381.189	21.143	1.80577
TP2019071903	Potentilla parvifolia	Rosaceae	shrub	deciduous	0.26	0.0012	0.0006	0.5	1	0.077675	129.458	77.2449	428.912	23.1699	1.70339
TP2019071903	Carex moorcroftii	Cyperaceae	herb	perennial	0.62	0.045	0.019	0.422222	1.36842	1.86938	98.3882	101.638	437.913	25.5306	1.3542
TP2019071903	Stipa roborowskyi	Poaceae	herb	perennial	0.36	0.00666667	0.00266667	0.4	1.5	0.332882	124.831	80.1085	450.198	20.0918	1.15477
TP2019071904	Stipa roborowskyi	Poaceae	herb	perennial	0.64	0.00266667	0.00233333	0.875	0.142857	0.27616	118.354	84.4921	444.997	23.7628	1.14515
TP2019071904	Potentilla bifurca	Rosaceae	herb	perennial	0.26	0.002	0.00133333	0.666667	0.5	0.20295	152.213	65.6976	410.787	31.7973	1.71985
TP2019071904	Draba winterbottomii	Brassicaceae	herb	perennial	0.56	0.00533333	0.00133333	0.25	3	0.172016	129.012	77.5123	369.781	38.0567	2.58412
TP2019071904	Helictotrichon tibeticum	Poaceae	herb	perennial	0.68	0.0164	0.0052	0.317073	2.15385	1.05876	203.609	49.1138	407.875	37.7984	3.4019
TP2019071904	Lasiocaryum densiflorum	Boraginaceae	herb	annual	0.64	0.0026	0.0008	0.307692	2.25	0.152505	190.632	52.4572	261.694	18.3866	1.76102
TP2019072001	Carex moorcroftii	Cyperaceae	herb	perennial	1.06	0.064	0.027	0.421875	1.37037	1.94347	71.9802	138.927	441.669	20.2612	0.847295
TP2019072001	Stipa roborowskyi	Poaceae	herb	perennial	0.32	0.004	0.002	0.5	1	0.247707	123.854	80.7404	438.076	24.8906	0.837838
TP2019072001	Rhodiola smithii	Crassulaceae	herb	perennial	1.8	0.0293333	0.002	0.0681818	13.6667	0.387937	193.968	51.5548	350.175	37.3663	3.23618
TP2019072001	Saussurea andryaloides	Asteraceae	herb	perennial	1.46	0.05	0.0133333	0.266667	2.75	1.36356	102.267	97.7836	394.644	34.4553	2.40026
TP2019072002	Potentilla parvifolia	Rosaceae	shrub	deciduous	0.12	0.0005	0.0003	0.6	0.666667	0.048915	163.05	61.3309	444.612	18.8946	1.57015
TP2019072002	Oreosolen wattii	Scrophulariaceae	herb	perennial	0.54	0.79	0.14	0.177215	4.64286	12.2146	87.2469	114.617	393.035	22.4213	2.44367
TP2019072002	Artemisia hedinii	Asteraceae	herb	annual	0.14	0.0003	0.000144	0.48	1.08333	0.038625	268.229	37.2816	431.143	33.497	3.65329
TP2019072002	Leontopodium	Asteraceae	herb	perennial	0.18	0.00766667	0.00233333	0.304348	2.28571	0.36948	158.349	63.1518	369.189	22.3695	1.92568
TP2019072002	Stipa roborowskyi	Poaceae	herb	perennial	0.7	0.004	0.00266667	0.666667	0.5	0.321175	120.441	83.0285	435.368	18.3452	1.23063
TP2019072002	Saussurea andryaloides	Asteraceae	herb	perennial	1.44	0.0496667	0.0153333	0.308725	2.23913	1.40626	91.7127	109.036	373.011	32.2364	2.1233
TP2019072002	Dracocephalum heterophyllum	Lamiaceae	herb	perennial	0.42	0.0266667	0.00566667	0.2125	3.70588	0.82874	146.248	68.3769	366.211	32.3996	2.24779
TP2019072101	Potentilla parvifolia	Rosaceae	shrub	deciduous	0.14	0.0008	0.0003	0.375	1.66667	0.044975	149.917	66.7037	424.3	12.735	1.49952
TP2019072101	Potentilla bifurca	Rosaceae	herb	perennial	0.42	0.00333333	0.00133333	0.4	1.5	0.234552	175.914	56.8461	347.395	21.5629	2.74974
TP2019072101	Morina chinensis	Caprifoliaceae	herb	perennial	0.522	0.568	0.126	0.221831	3.50794	10.0916	80.0917	124.857	381.585	17.709	1.6256
TP2019072101	Artemisia nanschanica	Asteraceae	herb	perennial	0.34	0.003	0.000666667	0.222222	3.5	0.12833	192.495	51.9494	402.478	29.8101	2.78511
TP2019072101	Leontopodium	Asteraceae	herb	perennial	0.24	0.008	0.00233333	0.291667	2.42857	0.406405	174.174	57.414	378.429	25.2244	1.7282
TP2019072102	Potentilla bifurca	Rosaceae	herb	perennial	0.4	0.00193548	0.000645161	0.333333	2	0.18194	282.007	35.4601	405.649	19.9624	1.65293
TP2019072102	Leontopodium	Asteraceae	herb	perennial	0.22	0.00466667	0.00166667	0.357143	1.8	0.262555	157.533	63.4788	385.475	21.6988	1.6604
TP2019072102	Stipa breviflora	Poaceae	herb	perennial	0.32	0.004	0.002	0.5	1	0.224447	112.224	89.1078	432.629	24.2109	1.34136
TP2019072102	Oreosolen wattii	Scrophulariaceae	herb	perennial	0.54	0.611667	0.105	0.171662	4.8254	9.49367	90.4159	110.6	417.736	29.2274	2.7583
TP2019072102	Saussurea andryaloides	Asteraceae	herb	perennial	0.36	0.0343333	0.00933333	0.271845	2.67857	1.1843	126.889	78.8092	397.217	34.8666	2.34253
TP2019072102	Astragalus arnoldii	Fabaceae	herb	perennial	0.08	0.0006	0.000230667	0.384444	1.60116	0.034215	148.331	67.4168	360.898	18.6177	0.750006
TP2019072103	Artemisia nanschanica	Asteraceae	herb	perennial	0.34	0.00633333	0.00166667	0.263158	2.8	0.188557	113.134	88.3908	442.403	26.7141	2.04537
TP2019072103	Draba winterbottomii	Brassicaceae	herb	perennial	0.74	0.00592593	0.00222222	0.375	1.66667	0.200122	90.055	111.043	343.959	21.7575	1.32475
TP2019072103	Stipa	Poaceae	herb	perennial	0.3	0.005	0.00366667	0.733333	0.363636	0.391276	106.712	93.7104	435.644	17.2052	1.14751
TP2019072201	Carex moorcroftii	Cyperaceae	herb	perennial	0.4	0.049	0.024	0.489796	1.04167	2.0381	84.9208	117.757	425.242	22.2655	1.06021
TP2019072201	Stipa roborowskyi	Poaceae	herb	perennial	0.6	0.003	0.00166667	0.555556	0.8	0.286372	171.823	58.1993	426.795	25.9667	1.18778
TP2019072201	Leontopodium pusillum	Asteraceae	herb	perennial	0.7	0.004	0.00133333	0.333333	2	0.36455	273.413	36.5748	375.962	25.4799	1.43651
TP2019072201	Kobresia littledalei	Cyperaceae	herb	perennial	1.3	0.0113333	0.00566667	0.5	1	0.600168	105.912	94.418	424.3	23.1518	1.74947
TP2019072201	Potentilla parvifolia	Rosaceae	shrub	deciduous	0.7	0.0005	0.0003	0.6	0.666667	0.04347	144.9	69.0131	417.813	24.3813	1.93576
TP2019072301	Artemisia nanschanica	Asteraceae	herb	perennial	0.5	0.00333333	0.000666667	0.2	4	0.135058	202.587	49.3615	416.92	29.2059	2.98565
TP2019072301	Rhodiola smithii	Crassulaceae	herb	perennial	1.9	0.041	0.00433333	0.105691	8.46154	0.515657	118.998	84.0352	371.814	33.6125	3.84382
TP2019072301	Arenaria gerzensis	Caryophyllaceae	herb	perennial	0.7	0.0012	0.0006	0.5	1	0.11162	186.033	53.7538	376.531	27.461	3.2427
TP2019072301	Kobresia pygmaea	Cyperaceae	herb	perennial	0.6	0.0017	0.0007	0.411765	1.42857	0.113876	162.681	61.4701	389.137	27.3918	2.6709
TP2019072302	Kobresia pygmaea	Cyperaceae	herb	perennial	1.2	0.0016	0.0007	0.4375	1.28571	0.151615	216.593	46.1696	416.294	18.8321	1.28674
TP2019072302	Potentilla parvifolia	Rosaceae	shrub	deciduous	0.5	0.001	0.0004	0.4	1.5	0.06086	152.15	65.7246	442.521	29.4786	2.1575
TP2019072302	Oxygraphis glacialis	Ranunculaceae	herb	perennial	0.24	0.0493333	0.013	0.263514	2.79487	1.37545	105.804	94.5143	376.136	30.2295	1.87939
TP2019072302	Arenaria gerzensis	Caryophyllaceae	herb	perennial	0.8	0.0004	0.0001	0.25	3	0.0310842	310.842	32.1707	413.134	14.6621	1.11937
TP2019072303	Kobresia pygmaea	Cyperaceae	herb	perennial	0.8	0.0008	0.0004	0.5	1	0.0909583	227.396	43.9762	/	/	/
TP2019072303	Anaphalis xylorhiza	Asteraceae	herb	perennial	0.6	0.01	0.004	0.4	1.5	0.54798	136.995	72.9954	407.098	18.0136	1.91149
TP2019072303	Potentilla parvifolia	Rosaceae	shrub	deciduous	0.9	0.0011	0.0002	0.181818	4.5	0.054845	274.225	36.4664	436.285	22.7187	2.07305
TP2019072303	Microula tibetica	Boraginaceae	herb	perennial	1.6	0.273	0.041	0.150183	5.65854	5.93662	144.796	69.0629	337.206	38.8574	2.94515
TP2019072303	Corydalis cornuta	Papaveraceae	herb	annual	1	0.011	0.00266667	0.242424	3.125	0.498655	186.996	53.4772	412.955	48.1288	3.60573
TP2019072401	Kobresia pygmaea	Cyperaceae	herb	perennial	0.3	0.000333333	0.0002	0.6	0.666667	0.050595	252.975	39.5296	413.162	25.7068	2.07684
TP2019072401	Carex moorcroftii	Cyperaceae	herb	perennial	0.62	0.0041	0.0023	0.560976	0.782609	0.280792	122.084	81.9111	420.21	29.9425	2.63532
TP2019072401	Potentilla parvifolia	Rosaceae	shrub	deciduous	0.44	0.0005	0.0002	0.4	1.5	0.04485	224.25	44.5931	428.962	24.8989	2.57013
TP2019072401	Potentilla saundersiana	Rosaceae	herb	perennial	0.66	0.00966667	0.00333333	0.344828	1.9	0.496034	148.81	67.1996	373.681	26.5235	2.80798
TP2019072402	Juniperus squamata	Cupressaceae	shrub	evergreen	0.9	0.0004	0.000266667	0.666667	0.5	0.02663	99.8625	100.138	/	/	/
TP2019072402	Potentilla parvifolia	Rosaceae	shrub	deciduous	0.46	0.0007	0.0002	0.285714	2.5	0.049865	249.325	40.1083	436.892	21.8951	1.63254
TP2019072402	Potentilla saundersiana	Rosaceae	herb	perennial	0.36	0.0103333	0.00333333	0.322581	2.1	0.57619	172.857	57.8513	401.156	31.9343	2.64786
TP2019072402	Astragalus monbeigii	Fabaceae	herb	perennial	0.42	0.00366667	0.00133333	0.363636	1.75	0.259128	194.346	51.4546	434.167	37.7542	2.57365
TP2019072402	Potentilla bifurca	Rosaceae	herb	perennial	0.1	0.000666667	0.000333333	0.5	1	0.111104	333.311	30.002	400.727	24.915	2.5622
TP2019072402	Aster flaccidus	Asteraceae	herb	perennial	0.32	0.0166667	0.00233333	0.14	6.14286	0.637174	273.075	36.62	380.782	30.0827	3.46688
TP2019072601	Kobresia pygmaea	Cyperaceae	herb	perennial	0.4	0.0014	0.0005	0.357143	1.8	0.105461	210.922	47.4108	410.58	26.9354	2.31661
TP2019072601	Potentilla bifurca	Rosaceae	herb	perennial	0.24	0.002	0.000666667	0.333333	2	0.155163	232.745	42.9655	383.403	25.9054	2.39661
TP2019072601	Potentilla saundersiana	Rosaceae	herb	perennial	0.4	0.0213333	0.00933333	0.4375	1.28571	1.262	135.214	73.9567	393.686	26.5726	1.90096
TP2019072602	Stellera chamaejasme	Thymelaeaceae	herb	perennial	0.36	0.031	0.011	0.354839	1.81818	1.33987	121.807	82.0973	394.946	26.8873	1.8688
TP2019072602	Iris loczyi	Iridaceae	herb	perennial	0.56	0.219	0.122	0.557078	0.795082	5.27293	43.2208	231.37	/	/	/
TP2019072602	Potentilla parvifolia	Rosaceae	shrub	deciduous	0.4	0.0008	0.0003	0.375	1.66667	0.046481	154.937	64.5426	423.232	15.2517	1.38615
TP2019072602	Oxytropis microphylla	Fabaceae	herb	perennial	0.24	0.00633333	0.001	0.157895	5.33333	0.361125	361.125	27.6912	416.056	31.7097	1.9346
TP2019072602	Artemisia wellbyi	Asteraceae	semi-shrub	perennial	0.5	0.003	0.001	0.333333	2	0.16274	162.74	61.4477	415.661	19.4428	1.84872
TP2019072603	Dracocephalum heterophyllum	Lamiaceae	herb	perennial	0.48	0.0216667	0.005	0.230769	3.33333	0.651362	130.272	76.7622	360.244	23.4755	1.9903
TP2019072603	Morina kokonorica	Caprifoliaceae	herb	perennial	1.54	0.518	0.155	0.299228	2.34194	9.23178	59.5599	167.898	/	/	/
TP2019072603	Arenaria bryophylla	Caryophyllaceae	herb	perennial	0.62	0.0007	0.0003	0.428571	1.33333	0.0625437	208.479	47.9664	365.428	19.2113	2.27105
TP2019072603	Oxytropis microphylla	Fabaceae	herb	perennial	0.24	0.004	0.000666667	0.166667	5	0.023215	34.8225	287.171	314.417	24.2101	1.54698
TP2019072603	Stipa purpurea	Poaceae	herb	perennial	0.36	0.00466667	0.00333333	0.714286	0.4	0.276611	82.9833	120.506	425.771	15.4477	1.01819
TP2019072603	Saussurea andryaloides	Asteraceae	herb	perennial	0.44	0.125	0.028	0.224	3.46429	3.05644	109.159	91.6097	432.843	24.8842	1.97928
TP2019072701	Stipa orientalis	Poaceae	herb	perennial	0.36	0.00466667	0.00233333	0.5	1	0.383017	164.15	60.9199	428.27	22.8373	0.882091
TP2019072701	Caragana versicolor	Fabaceae	shrub	deciduous	0.14	0.0014	0.0005	0.357143	1.8	0.083335	166.67	59.9988	427.113	32.5669	1.60943
TP2019072701	Artemisia nanschanica	Asteraceae	herb	perennial	0.4	0.016	0.00433333	0.270833	2.69231	0.649383	149.858	66.73	455.324	38.3802	2.75998
TP2019072701	Aster semiprostratus	Asteraceae	herb	perennial	0.36	0.00533333	0.002	0.375	1.66667	0.227409	113.705	87.9472	367.354	28.8748	1.71923
TP2019072702	Caragana versicolor	Fabaceae	shrub	deciduous	0.16	0.0011	0.0007	0.636364	0.571429	0.06937	99.1	100.908	/	/	/
TP2019072702	Astragalus strictus	Fabaceae	herb	perennial	0.36	0.00766667	0.00233333	0.304348	2.28571	0.25764	110.417	90.5656	372.777	30.4817	1.34583
TP2019072702	Poa nepalensis	Poaceae	herb	perennial	0.6	0.00966667	0.007	0.724138	0.380952	0.417323	59.6175	167.736	389.521	21.4461	1.91024
TP2019072801	Kobresia macrantha	Cyperaceae	herb	perennial	0.96	0.0156667	0.00633333	0.404255	1.47368	0.601328	94.9465	105.323	420.905	22.5097	1.43455
TP2019072801	Kobresia pygmaea	Cyperaceae	herb	perennial	0.54	0.0026	0.0014	0.538462	0.857143	0.25286	180.614	55.3666	/	/	/
TP2019072801	Caragana versicolor	Fabaceae	shrub	deciduous	0.26	0.0013	0.0006	0.461538	1.16667	0.066825	111.375	89.7868	425.706	27.3535	1.12161
TP2019072801	Pedicularis longiflora var. tubiformis	Orobanchaceae	herb	perennial	0.1	0.0003	0.0002	0.666667	0.5	0.04721	236.05	42.3639	/	/	/
TP2019072801	Kobresia schoenoides	Cyperaceae	herb	perennial	0.6	0.021	0.00733333	0.349206	1.86364	0.797844	108.797	91.9144	405.442	20.3971	1.37673
TP2019072802	Poa albertii	Poaceae	herb	perennial	0.56	0.007	0.00433333	0.619048	0.615385	0.36096	83.2985	120.05	414.746	32.4046	1.62664
TP2019072802	Astragalus strictus	Fabaceae	herb	perennial	0.22	0.00766667	0.00366667	0.478261	1.09091	0.45184	123.229	81.1497	405.649	30.9716	1.00666
TP2019072802	Oxytropis microphylla	Fabaceae	herb	perennial	0.08	0.000666667	0.000309333	0.464	1.15517	0.0223211	72.1586	138.584	320.262	25.0608	1.0914
TP2019072802	Iris loczyi	Iridaceae	herb	perennial	0.4	0.158	0.082	0.518987	0.926829	4.27096	52.0849	191.994	/	/	/
TP2019072803	Artemisia wellbyi	Asteraceae	semi-shrub	perennial	0.54	0.00966667	0.00266667	0.275862	2.625	0.24833	93.1238	107.384	415.661	29.6981	2.06591
TP2019072803	Thermopsis smithiana	Fabaceae	herb	perennial	0.42	0.0336667	0.013	0.386139	1.58974	1.2488	96.0615	104.1	435.917	33.4832	1.16461
TP2019072803	Iris loczyi	Iridaceae	herb	perennial	0.62	0.428	0.248	0.579439	0.725806	13.1069	52.8503	189.214	/	/	/
TP2019072803	Stipa	Poaceae	herb	perennial	0.12	0.00333333	0.00233333	0.7	0.428571	0.238771	102.33	97.7227	435.203	27.2099	1.65364
TP2019072901	Astragalus strictus	Fabaceae	herb	perennial	0.56	0.00733333	0.000666667	0.0909091	10	0.380943	571.415	17.5004	410.539	41.5078	2.4369
TP2019072901	Poa albertii	Poaceae	herb	perennial	0.3	0.0133333	0.004	0.3	2.33333	0.89448	223.62	44.7187	/	/	/
TP2019072901	Potentilla bifurca var. humilior	Rosaceae	herb	perennial	0.14	0.001	0.00094	0.94	0.0638298	0.08939	95.0957	105.157	368.61	26.95	1.73222
TP2019072902	Arisaema flavum subsp. Tibeticum	Araceae	herb	perennial	0.58	0.154	0.022	0.142857	6	9.41618	428.008	23.364	403.475	45.8256	3.75613
TP2019072902	Sophora moorcroftiana	Fabaceae	shrub	deciduous	0.12	0.0008	0.0004	0.5	1	0.07316	182.9	54.6747	/	/	/
TP2019072903	Potentilla bifurca var. humilior	Rosaceae	herb	perennial	0.34	0.0006	0.0004	0.666667	0.5	0.09226	230.65	43.3557	356.303	25.3003	1.92792
TP2019072903	Cotoneaster adpressus	Rosaceae	shrub	deciduous	0.16	0.008	0.00433333	0.541667	0.846154	0.4999	115.362	86.684	/	/	/
TP2019072903	Dolomiaea wardii	Asteraceae	herb	perennial	1.1	0.0423333	0.0136667	0.322835	2.09756	1.90384	139.306	71.7846	375.562	23.7106	2.67891
TP2019072903	Caragana versicolor	Fabaceae	shrub	deciduous	0.12	0.0012	0.0005	0.416667	1.4	0.09927	198.54	50.3677	449.423	18.8835	0.97651
TP2019073001	Iris loczyi	Iridaceae	herb	perennial	0.54	0.23	0.078	0.33913	1.94872	6.11348	78.3779	127.587	409.584	17.4092	1.20174
TP2019073001	Pulicaria insignis	Asteraceae	herb	perennial	0.36	0.1835	0.0565	0.307902	2.24779	7.7388	136.97	73.0087	270.097	15.5367	1.4136
TP2019073001	Artemisia wellbyi	Asteraceae	semi-shrub	perennial	0.76	0.0008	0.0005	0.625	0.6	0.061535	123.07	81.2546	382.792	22.0488	1.90679
TP2019073001	Onosma hookeri var. longiflorum	Boraginaceae	herb	perennial	0.42	0.0933333	0.0303333	0.325	2.07692	2.81903	92.9351	107.602	341.126	24.5092	1.93399
TP2019073001	Androsace cuttingii	Primulaceae	herb	perennial	0.6	0.0113333	0.00366667	0.323529	2.09091	0.355755	97.0241	103.067	416.812	21.3213	1.64887
TP2019073001	Ceratostigma ulicinum	Plumbaginaceae	shrub	deciduous	0.36	0.009	0.003	0.333333	2	0.50734	169.113	59.1319	351.976	16.3373	1.12268
TP2019073001	Potentilla parvifolia	Rosaceae	shrub	deciduous	0.24	0.0006	0.0003	0.5	1	0.063315	211.05	47.3821	424.3	20.4468	1.65673
TP2019073001	Poaceae	Poaceae	herb	perennial	0.42	0.0022	0.0016	0.727273	0.375	0.2034	127.125	78.6627	417.549	25.7586	2.03461
TP2019073001	Artemisia younghusbandii	Asteraceae	semi-shrub	perennial	0.7	0.0019	0.0004	0.210526	3.75	0.0993	248.25	40.282	412.595	21.9529	2.20632
TP2019073002	Sophora moorcroftiana	Fabaceae	shrub	deciduous	0.18	0.006	0.0022	0.366667	1.72727	0.299475	136.125	73.4619	449.515	32.984	1.56451
TP2019073002	Astragalus laxmannii	Fabaceae	herb	perennial	0.76	0.00466667	0.00233333	0.5	1	0.335135	143.629	69.6237	375.407	27.0589	1.54709
TP2019073002	Lasiocaryum densiflorum	Boraginaceae	herb	annual	0.54	0.00233333	0.000666667	0.285714	2.5	0.17055	255.825	39.0892	313.653	22.1771	1.74697
TP2019073101	Kobresia pygmaea	Cyperaceae	herb	perennial	0.56	0.0017	0.0007	0.411765	1.42857	0.121253	173.218	57.7306	413.42	26.754	2.13547
TP2019073101	Rheum globulosum	Polygonaceae	herb	perennial	1.04	0.59	0.142	0.240678	3.15493	8.90682	62.7241	159.428	328.832	23.2771	2.30955
TP2019073101	Oreosolen wattii	Scrophulariaceae	herb	perennial	1.02	0.342	0.064	0.187135	4.34375	5.36876	83.8869	119.208	409.221	22.4681	2.72426
TP2019073101	Saussurea andryaloides	Asteraceae	herb	perennial	0.6	0.0566667	0.0166667	0.294118	2.4	1.99764	119.859	83.4316	440.406	31.1223	2.45635
TP2019073101	Carex montis-everesti	Cyperaceae	herb	perennial	0.14	0.005	0.00233333	0.466667	1.14286	0.366247	156.963	63.7093	385.133	18.177	1.3037
TP2019073101	Gentiana urnula	Gentianaceae	herb	perennial	0.08	0.00333333	0.00143667	0.431	1.32019	0.164842	114.739	87.1541	472.169	17.818	1.57845
TP2019073102	Kobresia pygmaea	Cyperaceae	herb	perennial	0.56	0.0015	0.0007	0.466667	1.14286	0.1257	179.571	55.6881	405.7	25.7469	2.0231
TP2019073102	Carex praeclara	Cyperaceae	herb	perennial	0.9	0.017	0.0085	0.5	1	0.874195	102.846	97.2323	416.684	25.4496	1.51829
TP2019073102	Potentilla parvifolia	Rosaceae	shrub	deciduous	0.6	0.0009	0.0004	0.444444	1.25	0.04598	114.95	86.9943	436.811	19.2214	1.79523
TP2019073102	Potentilla bifurca var. humilior	Rosaceae	herb	perennial	0.24	0.00333333	0.00166667	0.5	1	0.24946	149.676	66.811	403.816	31.662	3.2327
TP2019073102	Rhodiola smithii	Crassulaceae	herb	perennial	1.66	0.0346429	0.00321429	0.0927835	9.77778	0.393535	122.433	81.6773	380.927	35.9309	4.06584
TP2019080101	Kobresia pygmaea	Cyperaceae	herb	perennial	0.4	0.001	0.0007	0.7	0.428571	0.144671	206.673	48.3855	421.089	22.4671	1.88983
TP2019080101	Kobresia macrantha	Cyperaceae	herb	perennial	0.16	0.0166667	0.00866667	0.52	0.923077	1.48065	170.844	58.5329	/	/	/
TP2019080101	Kobresia schoenoides	Cyperaceae	herb	perennial	0.92	0.0383333	0.0146667	0.382609	1.61364	1.46508	99.8916	100.109	418.86	25.7292	1.57212
TP2019080101	Pleurospermum hedinii	Apiaceae	herb	perennial	0.54	0.0014	0.0001	0.0714286	13	0.034	340	29.4118	404.043	30.2941	2.9821
TP2019080101	Saussurea andryaloides	Asteraceae	herb	perennial	0.3	0.0365	0.0125	0.342466	1.92	1.42428	113.942	87.7637	403.367	28.4797	2.44086
TP2019080102	Kobresia pygmaea	Cyperaceae	herb	perennial	0.06	0.0015	0.0006	0.4	1.5	0.123113	205.189	48.7356	/	/	/
TP2019080102	Kobresia hohxilensis	Cyperaceae	herb	perennial	0.42	0.00566667	0.003	0.529412	0.888889	0.54694	182.313	54.8506	408.136	25.5588	1.47918
TP2019080102	Carex montis-everesti	Cyperaceae	herb	perennial	0.58	0.00833333	0.00366667	0.44	1.27273	0.528415	144.113	69.3899	412.381	28.1243	1.72234
TP2019080102	Potentilla parvifolia	Rosaceae	shrub	deciduous	0.62	0.0009	0.0004	0.444444	1.25	0.050625	126.562	79.0123	441.048	16.1292	1.27365
TP2019080102	Leontopodium nanum	Asteraceae	herb	perennial	0.54	0.004	0.0012	0.3	2.33333	0.330265	275.221	36.3345	/	/	/
TP2019080201	Stellera chamaejasme	Thymelaeaceae	herb	perennial	0.3	0.0163333	0.00433333	0.265306	2.76923	0.939695	216.853	46.1143	419.833	28.8456	2.27579
TP2019080201	Potentilla saundersiana	Rosaceae	herb	perennial	0.22	0.0493333	0.0206667	0.418919	1.3871	2.36065	114.225	87.5463	247.905	18.4618	1.56307
TP2019080201	Artemisia wellbyi	Asteraceae	semi-shrub	perennial	0.64	0.0031	0.001	0.322581	2.1	0.295915	295.915	33.7935	394.349	26.7426	2.85551
TP2019080201	Saussurea nimborum	Asteraceae	herb	perennial	0.44	0.126	0.0265	0.210317	3.75472	3.76759	142.173	70.3367	370.029	21.4653	1.5985
TP2019080201	Kobresia humilis	Cyperaceae	herb	perennial	0.54	0.0054	0.0016	0.296296	2.375	0.442353	276.471	36.1702	379.928	24.9959	2.54569
TP2019080201	Dolomiaea wardii	Asteraceae	herb	perennial	0.82	0.87	0.198	0.227586	3.39394	17.9867	90.842	110.081	403.851	35.1803	3.04559
TP2019080201	Polygonum tortuosum	Polygonaceae	semi-shrub	perennial	0.232	0.0315	0.011	0.349206	1.86364	2.34363	213.058	46.9356	380.047	20.7431	2.72312
TP2019080201	Potentilla parvifolia	Rosaceae	shrub	deciduous	0.18	0.0005	0.0004	0.8	0.25	0.086565	216.412	46.2081	417.267	16.4652	2.01282
TP2019080202	Artemisia wellbyi	Asteraceae	semi-shrub	perennial	0.44	0.0017	0.0004	0.235294	3.25	0.10988	274.7	36.4033	408.187	20.5395	1.97929
TP2019080202	Sophora moorcroftiana	Fabaceae	shrub	deciduous	0.14	0.005	0.002	0.4	1.5	0.39194	195.97	51.0282	443.586	28.3072	1.28218
TP2019080401	Kobresia pygmaea	Cyperaceae	herb	perennial	0.5	0.0013	0.0005	0.384615	1.6	0.108455	216.91	46.1021	410.25	27.4467	2.30243
TP2019080401	Saussurea arenaria	Asteraceae	herb	perennial	0.68	0.0586667	0.0206667	0.352273	1.83871	2.15642	104.343	95.8379	425.334	27.7484	2.00292
TP2019080401	Aster flaccidus	Asteraceae	herb	perennial	0.52	0.048	0.012	0.25	3	1.48416	123.68	80.8535	394.946	23.183	2.34957
TP2019080401	Potentilla saundersiana	Rosaceae	herb	perennial	0.4	0.021	0.0103333	0.492063	1.03226	1.25337	121.294	82.4444	389.166	22.3093	2.10068
TP2019080401	Potentilla bifurca	Rosaceae	herb	perennial	0.32	0.00233333	0.00133333	0.571429	0.75	0.18712	140.34	71.2555	407.328	17.7192	2.22732
TP2019080401	Lamiophlomis rotata	Lamiaceae	herb	perennial	0.96	0.638	0.126	0.197492	4.06349	9.32696	74.0235	135.092	378.429	27.6778	2.11142
TP2019080402	Spiraea alpina	Rosaceae	shrub	deciduous	0.46	0.0106667	0.00466667	0.4375	1.28571	0.58702	125.79	79.4976	439.729	24.0178	1.8826
TP2019080402	Ribes xizangense	Grossulariaceae	shrub	deciduous	0.36	0.057	0.0223333	0.391813	1.55224	3.34922	149.965	66.6823	448.26	24.9124	2.51245
TP2019080402	Juniperus pingii var. wilsonii	Cupressaceae	shrub	evergreen	1.24	0.0007	0.0005	0.714286	0.4	0.0266	53.2	187.97	501.78	13.1376	1.36565
TP2019080402	Potentilla parvifolia	Rosaceae	shrub	deciduous	0.64	0.0007	0.000535	0.764286	0.308411	0.061485	114.925	87.0131	420.564	21.3181	1.94962
TP2019080402	Juniperus saltuaria	Cupressaceae	tree	evergreen	0.6	0.0012	0.0011	0.916667	0.0909091	0.04601	41.8273	239.078	531.855	12.7296	1.23747
TP2019080403	Lasiocaryum densiflorum	Boraginaceae	herb	annual	0.24	0.00333333	0.000666667	0.2	4	0.272245	408.368	24.4877	188.702	14.1494	1.99177
TP2019080403	Taraxacum stenoceras	Asteraceae	herb	perennial	0.44	0.0793333	0.015	0.189076	4.28889	3.06475	204.317	48.9436	378.429	33.5481	2.69984
TP2019080403	Potentilla saundersiana	Rosaceae	herb	perennial	0.52	0.045	0.017	0.377778	1.64706	2.45423	144.366	69.2682	348.431	21.6315	2.36563
TP2019080403	Kobresia humilis	Cyperaceae	herb	perennial	0.36	0.00366667	0.00133333	0.363636	1.75	0.49992	374.94	26.6709	357.774	21.1937	1.554
TP2019080403	Gerbera nivea	Asteraceae	herb	perennial	0.46	0.108667	0.024	0.220859	3.52778	3.87296	161.373	61.9681	/	/	/
TP2019080403	Oxytropis sericopetala	Fabaceae	herb	perennial	0.56	0.0133333	0.00466667	0.35	1.85714	0.681785	146.097	68.4478	396.602	29.0823	1.72161
TP2019080403	Astragalus strictus	Fabaceae	herb	perennial	0.38	0.0113333	0.00233333	0.205882	3.85714	0.611	261.857	38.1888	383.238	36.3944	2.4428
TP2019080501	Achnatherum jacquemontii	Poaceae	herb	perennial	0.7	0.0323333	0.013	0.402062	1.48718	1.40929	108.407	92.245	411.132	19.1735	1.09099
TP2019080501	Artemisia wellbyi	Asteraceae	semi-shrub	perennial	0.6	0.0012	0.000293	0.244167	3.09556	0.05696	194.403	51.4396	405.7	25.1389	2.05111
TP2019080501	Sophora moorcroftiana	Fabaceae	shrub	deciduous	0.2	0.003	0.00176667	0.588889	0.698113	0.183885	104.086	96.0745	458.352	29.3632	1.01686
TP2019080502	Artemisia gmelinii	Asteraceae	semi-shrub	perennial	0.2	0.0002	7.4e-05	0.37	1.7027	0.0212875	287.669	34.7622	461.566	27.9877	1.91505
TP2019080502	Pterocephalus hookeri	Caprifoliaceae	herb	perennial	0.8	0.156	0.0293333	0.188034	4.31818	3.81847	130.175	76.8195	414.316	20.3282	1.64627
TP2019080502	Lancea tibetica	Mazaceae	herb	perennial	0.44	0.0423333	0.00866667	0.204724	3.88462	1.62837	187.889	53.223	414.208	24.3741	1.53488
TP2019080502	Kobresia pygmaea	Cyperaceae	herb	perennial	0.52	0.0016	0.0006	0.375	1.66667	0.16529	275.483	36.2998	392.477	24.5466	2.04398
TP2019080502	Phlomis younghusbandii	Lamiaceae	herb	perennial	0.88	0.524	0.144	0.274809	2.63889	16.7668	116.436	85.8842	394.984	26.9231	1.91182
TP2019080502	Ligularia rumicifolia	Asteraceae	herb	perennial	0.5	4.208	0.662	0.157319	5.3565	41.6984	62.9885	158.759	382.381	26.7768	1.39814
TP2019080502	Potentilla parvifolia	Rosaceae	shrub	deciduous	0.24	0.0014	0.0006	0.428571	1.33333	0.122365	203.942	49.0336	411.204	20.1551	1.83711
TP2019080502	Astragalus strictus	Fabaceae	herb	perennial	0.2	0.005	0.00147667	0.295333	2.386	0.248185	168.071	59.4986	434.524	35.3055	1.9719
TP2019080502	Stellera chamaejasme	Thymelaeaceae	herb	perennial	0.32	0.015	0.00533333	0.355556	1.8125	0.81676	153.143	65.2987	407.119	31.4223	1.57535
TP2019080601	Stipa breviflora	Poaceae	herb	perennial	0.24	0.0185	0.012	0.648649	0.541667	2.03908	169.923	58.8501	424.3	28.7784	2.06935
TP2019080601	Lancea tibetica	Mazaceae	herb	perennial	0.24	0.0106667	0.00366667	0.34375	1.90909	0.73179	199.579	50.1054	391.451	30.7239	3.16705
TP2019080601	Arenaria bryophylla	Caryophyllaceae	herb	perennial	0.32	0.0006	0.000349	0.581667	0.719198	0.068145	195.258	51.2143	383.385	22.3457	2.43312
TP2019080601	Kobresia humilis	Cyperaceae	herb	perennial	0.12	0.0012	0.001	0.833333	0.2	0.203426	203.426	49.1578	401.518	27.7723	1.85576
TP2019080601	Kobresia pygmaea	Cyperaceae	herb	perennial	0.36	0.0007	0.0004	0.571429	0.75	0.114688	286.721	34.8772	391.27	26.4112	2.32933
TP2019080601	Artemisia campbellii	Asteraceae	herb	perennial	0.4	0.00466667	0.00133333	0.285714	2.5	0.455235	341.426	29.2889	403.202	34.3569	3.88861
TP2019080601	Juniperus pingii var. wilsonii	Cupressaceae	shrub	evergreen	0.2	0.0005	0.00045	0.9	0.111111	0.031	68.8889	145.161	495.455	12.4544	1.06827
TP2019080602	Lamiophlomis rotata	Lamiaceae	herb	perennial	1	0.932	0.212	0.227468	3.39623	15.6035	73.6014	135.867	397.005	28.0055	1.32493
TP2019080602	Kobresia pygmaea	Cyperaceae	herb	perennial	0.56	0.0011	0.0005	0.454545	1.2	0.10049	200.98	49.7562	416.812	36.2567	2.10659
TP2019080602	Potentilla bifurca	Rosaceae	herb	perennial	0.08	0.00133333	0.00123667	0.9275	0.0781671	0.14852	120.097	83.266	415.521	31.2095	2.02579
TP2019080602	Saussurea andryaloides	Asteraceae	herb	perennial	0.44	0.038	0.018	0.473684	1.11111	1.64605	91.4472	109.353	430.434	32.6035	1.79855
TP2019080701	Polygonum tortuosum	Polygonaceae	semi-shrub	perennial	0.36	0.262	0.08	0.305344	2.275	13.7885	172.357	58.0193	439.823	38.0529	2.73818
TP2019080701	Corydalis hookeri	Papaveraceae	herb	perennial	0.44	0.0186667	0.00366667	0.196429	4.09091	1.14045	311.032	32.1511	399.341	44.8292	1.7777
TP2019080701	Aster semiprostratus	Asteraceae	herb	perennial	0.28	0.01	0.002	0.2	4	0.5519	275.95	36.2384	331.065	31.0281	2.31943
TP2019080701	Potentilla bifurca	Rosaceae	herb	perennial	0.24	0.00517241	0.00137931	0.266667	2.75	0.307275	222.774	44.8885	406.931	30.0284	2.13922
TP2019080701	Artemisia phaeolepis	Asteraceae	herb	perennial	0.2	0.0004	0.0002	0.5	1	0.061495	307.475	32.523	448.137	35.4436	2.44276
TP2019080702	Anaphalis xylorhiza	Asteraceae	herb	perennial	0.2	0.0096	0.0032	0.333333	2	0.48945	152.953	65.3795	405.966	22.9561	1.61667
TP2019080702	Lancea tibetica	Mazaceae	herb	perennial	0.4	0.05	0.013	0.26	2.84615	1.7238	132.6	75.4148	383.761	22.9157	1.80049
TP2019080702	Rhodiola stapfii	Crassulaceae	herb	perennial	0.64	0.0373333	0.00633333	0.169643	4.89474	0.738495	116.604	85.76	378.356	27.6829	2.89376
TP2019080702	Kobresia pygmaea	Cyperaceae	herb	perennial	0.28	0.0009	0.0005	0.555556	0.8	0.09504	190.08	52.6094	414.871	32.2714	2.5926
TP2019080702	Lamiophlomis rotata	Lamiaceae	herb	perennial	0.84	0.938	0.256	0.272921	2.66406	18.8628	73.6827	135.717	397.946	27.1401	1.83477
TP2019080703	Leptodermis pilosa var. acanthoclada	Rubiaceae	shrub	deciduous	0.52	0.0103333	0.00166667	0.16129	5.2	0.4831	289.86	34.4994	396.628	23.9026	2.0151
TP2019080703	Artemisia gmelinii	Asteraceae	semi-shrub	perennial	0.24	0.0017	0.0004	0.235294	3.25	0.13697	342.425	29.2035	432.314	40.4283	3.26838
TP2019080703	Dolomiaea wardii	Asteraceae	herb	perennial	0.82	2.528	0.67	0.265032	2.77313	48.9475	73.0559	136.881	372.622	20.3254	1.88858
TP2019080703	Danthonia cumminsii	Poaceae	herb	perennial	0.64	0.024	0.015	0.625	0.6	1.2101	80.6733	123.957	393.992	25.499	1.65076
TP2019080703	Pulicaria insignis	Asteraceae	herb	perennial	0.28	0.322	0.102	0.31677	2.15686	16.1368	158.204	63.2094	302.853	19.1648	1.41004
TP2019080703	Sophora moorcroftiana	Fabaceae	shrub	deciduous	0.08	0.012	0.00966667	0.805556	0.241379	0.10402	10.7607	929.308	446.165	34.6704	1.47138
TP2019080801	Spiraea mollifolia	Rosaceae	shrub	deciduous	0.24	0.0146667	0.00633333	0.431818	1.31579	0.8758	138.284	72.3148	450.215	28.2131	1.79536
TP2019080801	Berberis hemsleyana	Berberidaceae	shrub	deciduous	0.28	0.0216667	0.009	0.415385	1.40741	0.824715	91.635	109.129	448.968	21.6647	1.30932
TP2019080801	Rosa sericea	Rosaceae	shrub	deciduous	0.16	0.013	0.0058	0.446154	1.24138	1.25701	216.727	46.1411	/	/	/
TP2019080801	Caragana bicolor	Fabaceae	shrub	deciduous	0.14	0.0041	0.0017	0.414634	1.41176	0.255985	150.579	66.4101	450.015	45.4757	2.27281
TP2019080801	Cotoneaster hebephyllus	Rosaceae	shrub	deciduous	0.12	0.0396667	0.0206667	0.521008	0.919355	2.01363	97.4337	102.634	457.913	26.2244	1.1526
TP2019080802	Gerbera nivea	Asteraceae	herb	perennial	0.42	0.155	0.0375	0.241935	3.13333	6.21352	165.694	60.3523	388.085	15.794	1.35079
TP2019080802	Plantago depressa	Plantaginaceae	herb	annual	0.38	0.179	0.047	0.26257	2.80851	2.88057	61.2887	163.162	368.486	19.4289	1.44342
TP2019080802	Leptodermis pilosa var. acanthoclada	Rubiaceae	shrub	deciduous	0.26	0.0098	0.0034	0.346939	1.88235	0.627655	184.604	54.1699	402.464	26.0879	2.05331
TP2019080802	Ceratostigma minus	Plumbaginaceae	shrub	deciduous	0.36	0.018	0.007	0.388889	1.57143	0.69062	98.66	101.358	397.451	15.1192	1.60745
TP2019080802	Artemisia vestita	Asteraceae	semi-shrub	perennial	0.12	0.0011	0.000414	0.376364	1.657	0.133305	321.993	31.0566	461.426	26.7699	2.02573
TP2019080802	Leontopodium stracheyi	Asteraceae	herb	perennial	0.42	0.0036	0.002	0.555556	0.8	0.34651	173.255	57.7184	396.72	19.6369	1.55463
TP2019080802	Sophora moorcroftiana	Fabaceae	shrub	deciduous	0.5	0.00433333	0.00166667	0.384615	1.6	0.198855	119.313	83.8132	446.373	31.0243	1.48406
TP2019080802	Taraxacum stenoceras	Asteraceae	herb	perennial	0.22	0.114	0.0216667	0.190058	4.26154	3.56848	164.699	60.7168	414.432	26.7249	2.19591
TP2019081001	Pennisetum flaccidum	Poaceae	herb	perennial	0.16	0.026	0.012	0.461538	1.16667	2.37056	197.547	50.621	380.133	30.5354	2.80129
TP2019081001	Astragalus strictus	Fabaceae	herb	perennial	0.28	0.0113333	0.00366667	0.323529	2.09091	0.57265	156.177	64.0298	371.814	40.0428	2.54386
TP2019081001	Ligularia rumicifolia	Asteraceae	herb	perennial	0.52	4.168	0.656	0.15739	5.35366	94.4339	143.954	69.4666	383.511	36.2107	3.84928
TP2019081001	Lasiocaryum densiflorum	Boraginaceae	herb	annual	0.16	0.002	0.0008	0.4	1.5	0.168135	210.169	47.5808	240.159	17.3811	1.36945
TP2019081001	Potentilla parvifolia	Rosaceae	shrub	deciduous	0.24	0.0018	0.0004	0.222222	3.5	0.15603	390.075	25.6361	430.905	22.4341	1.61782
TP2019081001	Caragana versicolor	Fabaceae	shrub	deciduous	0.08	0.0014	0.0004	0.285714	2.5	0.12908	322.7	30.9885	446.02	32.3838	1.87899
TP2019081001	Artemisia wellbyi	Asteraceae	semi-shrub	perennial	0.12	0.0006	0.000296	0.493333	1.02703	0.0731476	247.12	40.4661	299.662	24.7706	2.23184
TP2019081001	Potentilla bifurca var. humilior	Rosaceae	herb	perennial	0.2	0.002	0.0014	0.7	0.428571	0.19918	142.271	70.2882	335.904	21.6395	1.42685
TP2019081002	Lancea tibetica	Mazaceae	herb	perennial	0.44	0.0753333	0.0203333	0.269912	2.70492	2.72634	134.082	74.5811	370.342	23.4335	1.61483
TP2019081002	Potentilla bifurca var. humilior	Rosaceae	herb	perennial	0.16	0.00133333	0.001	0.75	0.333333	0.160463	160.463	62.3196	411.519	30.0253	1.92089
TP2019081002	Potentilla anserina	Rosaceae	herb	perennial	0.2	0.00566667	0.00166667	0.294118	2.4	0.249955	149.973	66.6787	393.093	23.2931	1.24546
TP2019081002	Leontopodium nanum	Asteraceae	herb	perennial	0.12	0.00466667	0.00133333	0.285714	2.5	0.386995	290.246	34.4535	373.179	20.7097	1.57802
TP2019081002	Kobresia pygmaea	Cyperaceae	herb	perennial	0.28	0.001	0.000628	0.628	0.592357	0.1105	175.955	56.8326	415.98	26.5993	1.51191
TP2019081002	Kobresia humilis	Cyperaceae	herb	perennial	0.16	0.00655172	0.00448276	0.684211	0.461538	0.446563	99.6179	100.384	420.417	27.3383	1.44234
TP2019081003	Anaphalis xylorhiza	Asteraceae	herb	perennial	0.4	0.0136667	0.00633333	0.463415	1.15789	0.618875	97.7171	102.336	429.291	23.9804	1.76398
TP2019081003	Kobresia pygmaea	Cyperaceae	herb	perennial	0.52	0.0014	0.00085	0.607143	0.647059	0.11892	139.906	71.4766	/	/	/
TP2019081003	Leontopodium nanum	Asteraceae	herb	perennial	0.36	0.00366667	0.00233333	0.636364	0.571429	0.37339	160.024	62.4905	/	/	/
TP2019081003	Stipa breviflora	Poaceae	herb	perennial	0.36	0.00233333	0.00177667	0.761429	0.313321	0.141912	79.8757	125.195	/	/	/
TP2020071101	Potentilla anserina	Rosaceae	herb	perennial	0.108	0.0012	0.0007	0.583333	0.714286	0.21047	300.671	33.2589	496.478	18.7081	1.97239
TP2020071101	Carex moorcroftii	Cyperaceae	herb	perennial	0.242	0.031	0.0105	0.33871	1.95238	1.7313	164.886	60.6481	416.256	24.2857	1.87833
TP2020071101	Potentilla bifurca	Rosaceae	herb	perennial	0.152	0.003	0.00166667	0.555556	0.8	0.3073	184.38	54.2358	413.977	21.6416	2.02162
TP2020071101	Dontostemon glandulosus	Brassicaceae	herb	annual	0.586	0.034	0.00466667	0.137255	6.28571	0.956467	204.957	48.7907	235.938	22.9253	1.43053
TP2020071101	Kobresia pygmaea	Cyperaceae	herb	perennial	0.354	0.0021	0.0008	0.380952	1.625	0.1003	125.375	79.7607	465.692	26.8394	1.73384
TP2020071101	Stipa capillacea	Poaceae	herb	perennial	0.158	0.008	0.0036	0.45	1.22222	0.34128	94.8	105.485	507.087	24.34	1.05785
TP2020071101	Rhodiola smithii	Crassulaceae	herb	perennial	0.694	0.0155	0.0015	0.0967742	9.33333	0.26085	173.9	57.5043	434.218	37.6278	3.55609
TP2020071101	Potentilla parvifolia	Rosaceae	shrub	deciduous	0.226	0.002	0.0009	0.45	1.22222	0.09219	102.433	97.6245	433.627	22.4165	1.91113
TP2020071101	Kobresia schoenoides	Cyperaceae	herb	perennial	0.378	0.0415	0.016	0.385542	1.59375	1.8612	116.325	85.966	408.735	27.5444	1.77285
TP2020071101	Lancea tibetica	Mazaceae	herb	perennial	0.37	0.045	0.0125	0.277778	2.6	1.6775	134.2	74.5156	431.532	23.7052	2.22456
TP2020071101	Potentilla saundersiana	Rosaceae	herb	perennial	0.46	0.014	0.0045	0.321429	2.11111	0.5342	118.711	84.2381	177.672	28.0804	1.9964
TP2020071102	Juniperus squamata	Cupressaceae	shrub	evergreen	0.362	0.0005	0.0001	0.2	4	0.02967	296.7	33.7041	512.262	12.8569	1.63858
TP2020071102	Astragalus laxmannii	Fabaceae	herb	perennial	0.274	0.00866667	0.00233333	0.269231	2.71429	0.443733	190.171	52.5841	420.997	34.7678	2.54391
TP2020071102	Orinus thoroldii	Poaceae	herb	perennial	0.248	0.0305	0.015	0.491803	1.03333	1.21665	81.11	123.289	404.145	18.9152	2.03378
TP2020071102	Iris loczyi	Iridaceae	herb	perennial	0.724	0.3445	0.1385	0.402032	1.48736	7.2573	52.3993	190.842	422.666	15.9215	1.6409
TP2020071102	Onosma waltonii	Boraginaceae	herb	perennial	0.984	0.1815	0.052	0.286501	2.49038	3.0713	59.0635	169.309	372.352	22.0827	2.66278
TP2020071201	Artemisia vestita	Asteraceae	semi-shrub	perennial	0.322	0.0058	0.002	0.344828	1.9	0.32546	162.73	61.4515	482.703	23.4726	3.55983
TP2020071201	Artemisia wellbyi	Asteraceae	semi-shrub	perennial	0.386	0.00466667	0.001	0.214286	3.66667	0.104367	104.367	95.816	440.291	21.8404	2.87372
TP2020071202	Rhodiola smithii	Crassulaceae	herb	perennial	0.824	0.02	0.001	0.05	19	0.333933	333.933	29.9461	397.084	42.2939	5.20042
TP2020071202	Oxytropis microphylla	Fabaceae	herb	perennial	0.178	0.0006	0.0001	0.166667	5	0.02768	276.8	36.1272	333.83	35.1668	2.1016
TP2020071202	Artemisia wellbyi	Asteraceae	semi-shrub	perennial	0.276	0.00433333	0.001	0.230769	3.33333	0.1325	132.5	75.4717	448.474	22.7308	2.46616
TP2020071202	Stipa purpurea	Poaceae	herb	perennial	0.44	0.0054	0.0028	0.518519	0.928571	0.25922	92.5786	108.016	445.632	17.042	0.971991
TP2020071202	Artemisia stracheyi	Asteraceae	herb	perennial	0.132	0.0005	0.0001	0.2	4	0.13093	130.9	76.3942	442.839	22.27	1.92378
TP2020071203	Stipa purpurea	Poaceae	herb	perennial	0.244	0.005	0.00233333	0.466667	1.14286	0.2159	92.5286	108.075	286.426	17.1068	1.13495
TP2020071203	Potentilla parvifolia	Rosaceae	shrub	deciduous	0.116	0.0008	0.0005	0.625	0.6	0.05655	113.1	88.4173	427.506	18.1656	1.72662
TP2020071203	Anaphalis xylorhiza	Asteraceae	herb	perennial	0.372	0.013	0.006	0.461538	1.16667	0.583533	97.2556	102.822	377.485	20	1.56959
TP2020071203	Oxytropis microphylla	Fabaceae	herb	perennial	0.2	0.0009	0.0002	0.222222	3.5	0.03313	165.65	60.3682	405.18	38.0793	1.63528
TP2020071203	Artemisia stracheyi	Asteraceae	herb	perennial	0.17	0.0003	0.0001	0.333333	2	0.03899	389.9	25.6476	433.339	27.0062	2.82221
TP2020071203	Saussurea andryaloides	Asteraceae	herb	perennial	0.312	0.04	0.0153333	0.383333	1.6087	1.2352	80.5565	124.136	399.445	22.874	1.79233
TP2020071204	Kobresia pygmaea	Cyperaceae	herb	perennial	0.078	0.0022	0.0008	0.363636	1.75	0.10442	130.525	76.6137	421.427	24.1284	1.92703
TP2020071204	Potentilla bifurca	Rosaceae	herb	perennial	0.218	0.00233333	0.000333333	0.142857	6	0.2294	688.2	14.5307	445.359	27.655	2.01048
TP2020071204	Potentilla saundersiana	Rosaceae	herb	perennial	0.318	0.0123333	0.005	0.405405	1.46667	0.5713	114.26	87.5197	381.725	24.4867	1.92333
TP2020071204	Lamiophlomis rotata	Lamiaceae	herb	perennial	1	1.806	0.328	0.181617	4.5061	20.0652	61.1744	163.467	418.917	20.7058	1.92855
TP2020071204	Potentilla parvifolia	Rosaceae	shrub	deciduous	0.188	0.0012	0.0005	0.416667	1.4	0.07623	152.46	65.591	450.129	21.4173	2.05843
TP2020071204	Nardostachys jatamansi	Caprifoliaceae	herb	perennial	0.498	0.111667	0.0253333	0.226866	3.40789	4.05087	159.903	62.5381	435.981	20.1465	1.56351
TP2020071204	Kobresia prainii	Cyperaceae	herb	perennial	0.352	0.013	0.00566667	0.435897	1.29412	0.5772	101.859	98.1751	401.632	21.9774	1.16853
TP2020071301	Phlomis pygmaea	Lamiaceae	herb	perennial	0.372	0.277	0.0935	0.337545	1.96257	8.2197	87.9112	113.751	419.9	26.0421	2.34949
TP2020071301	Onosma waltonii	Boraginaceae	herb	perennial	0.442	0.1185	0.032	0.270042	2.70312	2.1613	67.5406	148.059	342.233	21.5659	2.67242
TP2020071301	Artemisia wellbyi	Asteraceae	semi-shrub	perennial	0.266	0.0036	0.0008	0.222222	3.5	0.11	137.5	72.7273	461.891	23.7124	2.29701
TP2020071301	Morina kokonorica	Caprifoliaceae	herb	perennial	0.392	0.638	0.1855	0.290752	2.43935	9.60235	51.7647	193.182	410.805	15.9466	1.60471
TP2020071301	Lonicera spinosa	Caprifoliaceae	shrub	deciduous	0.284	0.008	0.003	0.375	1.66667	0.39058	130.193	76.8088	498.58	17.7596	2.17941
TP2020071302	Oxytropis microphylla	Fabaceae	herb	perennial	0.18	0.0005	0.0001	0.2	4	0.09549	95.49	104.723	292.457	18.6391	1.25864
TP2020071302	Phlomis pygmaea	Lamiaceae	herb	perennial	0.456	0.516	0.174	0.337209	1.96552	10.4367	59.981	166.719	409.24	23.1779	2.7216
TP2020071302	Artemisia wellbyi	Asteraceae	semi-shrub	perennial	0.238	0.0014	0.0002	0.142857	6	0.08242	412.1	24.266	476.78	19.5934	2.3503
TP2020071302	Incarvillea younghusbandii	Bignoniaceae	herb	perennial	0.352	0.061	0.0156667	0.256831	2.89362	1.3296	84.8681	117.83	462.989	26.9337	2.48757
TP2020071302	Carex praeclara	Cyperaceae	herb	perennial	0.266	0.0813333	0.036	0.442623	1.25926	2.30697	64.0824	156.049	441.441	16.1603	1.39683
TP2020071302	Stipa purpurea	Poaceae	herb	perennial	0.22	0.007	0.0042	0.6	0.666667	0.5282	125.762	79.5153	448.622	13.9726	1.22595
TP2020071302	Carex montis-everesti	Cyperaceae	herb	perennial	0.17	0.0172	0.007	0.406977	1.45714	0.78952	112.789	88.6615	440.693	21.2096	1.12684
TP2020071303	Caragana versicolor	Fabaceae	shrub	deciduous	0.174	0.0015	0.0005	0.333333	2	0.08153	163.06	61.3271	473.798	29.1439	1.33099
TP2020071303	Stipa roborowskyi	Poaceae	herb	perennial	0.262	0.0243333	0.0116667	0.479452	1.08571	1.5965	136.843	73.0765	459.625	18.8142	0.976608
TP2020071303	Stipa purpurea	Poaceae	herb	perennial	0.168	0.0094	0.0054	0.574468	0.740741	0.33418	61.8852	161.59	445.594	23.8039	1.75397
TP2020071303	Leymus secalinus	Poaceae	herb	perennial	0.388	0.1835	0.072	0.392371	1.54861	3.10185	43.0812	232.12	442.039	18.7074	1.1957
TP2020071303	Kobresia royleana	Cyperaceae	herb	perennial	0.2	0.0138	0.0058	0.42029	1.37931	0.59214	102.093	97.9498	421.569	14.2885	0.60514
TP2020071304	Artemisia minor	Asteraceae	semi-shrub	perennial	0.12	0.0008	0.0001	0.125	7	0.11004	110	90.9091	368.446	18.0614	1.90844
TP2020071304	Carex praeclara	Cyperaceae	herb	perennial	0.256	0.05	0.02	0.4	1.5	1.69715	84.8575	117.845	442.147	16.6403	1.5262
TP2020071304	Astragalus kuschakevitschii	Fabaceae	herb	perennial	0.1	0.00025	5e-05	0.2	4	0.012115	242.3	41.2712	436.492	35.0685	2.59657
TP2020071304	Stipa purpurea	Poaceae	herb	perennial	0.21	0.007	0.0034	0.485714	1.05882	0.2739	80.5588	124.133	426.138	16.3701	1.34808
TP2020071401	Arenaria bryophylla	Caryophyllaceae	herb	perennial	0.108	0.0006	0.0001	0.166667	5	0.11804	118.04	84.717	451.275	7.59968	0.990812
TP2020071401	Potentilla parvifolia	Rosaceae	shrub	deciduous	0.16	0.0011	0.0005	0.454545	1.2	0.04811	96.22	103.928	429.459	17.252	1.73872
TP2020071401	Poa hirtiglumis var. nimuana	Poaceae	herb	perennial	0.182	0.005	0.0026	0.52	0.923077	0.27386	105.331	94.939	431.71	17.7943	1.96303
TP2020071401	Carex nakaoana	Cyperaceae	herb	perennial	0.178	0.0138	0.0054	0.391304	1.55556	0.60512	112.059	89.2385	414.657	22.7042	1.90827
TP2020071401	Potentilla bifurca	Rosaceae	herb	perennial	0.168	0.003	0.001	0.333333	2	0.261167	261.167	38.2897	405.167	32.4459	2.8707
TP2020071401	Potentilla saundersiana	Rosaceae	herb	perennial	0.24	0.00633333	0.00233333	0.368421	1.71429	0.378967	162.414	61.5709	440.925	24.3596	2.20035
TP2020071401	Thalictrum alpinum	Ranunculaceae	herb	perennial	0.158	0.003	0.0008	0.266667	2.75	0.28666	358.325	27.9076	428.633	25.8065	1.64368
TP2020071401	Kobresia pygmaea	Cyperaceae	herb	perennial	0.204	0.0015	0.0006	0.4	1.5	0.07768	129.467	77.24	445.367	25.9682	1.80435
TP2020071402	Caragana versicolor	Fabaceae	shrub	deciduous	0.182	0.0017	0.0006	0.352941	1.83333	0.09738	162.3	61.6143	447.72	30.0585	2.03354
TP2020071402	Stipa purpurea	Poaceae	herb	perennial	0.234	0.007	0.0028	0.4	1.5	0.35474	126.693	78.931	438.415	15.1149	1.47225
TP2020071402	Alyssum canescens	Brassicaceae	semi-shrub	perennial	0.262	0.004	0.00166667	0.416667	1.4	0.1258	75.48	132.485	352.233	28.8562	3.1524
TP2020071501	Artemisia wellbyi	Asteraceae	semi-shrub	perennial	0.254	0.0034	0.0008	0.235294	3.25	0.09952	124.4	80.3859	423.156	23.5374	3.00799
TP2020071501	Artemisia minor	Asteraceae	semi-shrub	perennial	0.128	0.0002	0.0001	0.5	1	0.11381	113.8	87.8735	440.881	18.9521	2.60717
TP2020071501	Carex praeclara	Cyperaceae	herb	perennial	0.294	0.0703333	0.034	0.483412	1.06863	2.481	72.9706	137.042	406.007	14.1274	1.22413
TP2020071501	Poa hirtiglumis var. nimuana	Poaceae	herb	perennial	0.172	0.0054	0.003	0.555556	0.8	0.34006	113.353	88.2197	402.009	12.4684	1.52907
TP2020071501	Stipa purpurea	Poaceae	herb	perennial	0.25	0.008	0.0042	0.525	0.904762	0.30366	72.3	138.313	425.563	15.0386	1.4208
TP2020071501	Artemisia stracheyi	Asteraceae	herb	perennial	0.164	0.0008	0.0001	0.125	7	0.1144	114.4	87.4126	428.468	25.432	3.50732
TP2020071501	Saussurea andryaloides	Asteraceae	herb	perennial	0.38	0.0636667	0.0223333	0.350785	1.85075	1.5902	71.203	140.444	422.395	22.1919	2.34847
TP2020071502	Oxytropis microphylla	Fabaceae	herb	perennial	0.13	0.0004	0.0002	0.5	1	0.0170333	85.1667	117.417	375.789	34.2846	1.78187
TP2020071502	Stipa purpurea	Poaceae	herb	perennial	0.206	0.007	0.0038	0.542857	0.842105	0.252	66.3158	150.794	412.084	17.7703	2.142
TP2020071502	Alyssum canescens	Brassicaceae	semi-shrub	perennial	0.272	0.004	0.001	0.25	3	0.213267	213.267	46.8897	329.771	24.7697	2.80471
TP2020071502	Potentilla bifurca	Rosaceae	herb	perennial	0.198	0.00533333	0.00233333	0.4375	1.28571	0.398533	170.8	58.548	382.693	19.9083	2.2088
TP2020071502	Astragalus kuschakevitschii	Fabaceae	herb	perennial	0.152	0.0009	0.0001	0.111111	8	0.03893	389.3	25.6871	382.044	35.7734	2.33683
TP2020071502	Stipa sareptana var. krylovii	Poaceae	herb	perennial	0.22	0.00966667	0.00533333	0.551724	0.8125	0.777633	145.806	68.5842	407.065	20.8301	1.3026
TP2020071502	Caragana versicolor	Fabaceae	shrub	deciduous	0.168	0.0012	0.0004	0.333333	2	0.08471	211.775	47.2199	431.986	32.3352	1.70272
TP2020071503	Caragana versicolor	Fabaceae	shrub	deciduous	0.196	0.0014	0.0005	0.357143	1.8	0.07395	147.9	67.6133	438.436	34.891	1.72734
TP2020071503	Ajania fruticulosa	Asteraceae	semi-shrub	perennial	0.226	0.006	0.0016	0.266667	2.75	0.2513	157.062	63.6689	590.033	31.3718	2.59302
TP2020071503	Aster boweri	Asteraceae	herb	perennial	0.202	0.00533333	0.00166667	0.3125	2.2	0.4916	294.96	33.9029	357.96	31.6049	4.16569
TP2020071503	Oxytropis microphylla	Fabaceae	herb	perennial	0.18	0.001	0.0004	0.4	1.5	0.03667	91.675	109.081	408.412	33.4386	1.45166
TP2020071503	Alyssum canescens	Brassicaceae	semi-shrub	perennial	0.294	0.009	0.002	0.222222	3.5	0.3154	157.7	63.4115	351.768	33.1838	1.93566
TP2020071503	Stipa purpurea	Poaceae	herb	perennial	0.24	0.0092	0.0052	0.565217	0.769231	0.42994	82.6808	120.947	387.39	21.0465	1.90678
TP2020071601	Achnatherum duthiei	Poaceae	herb	perennial	0.28	0.0306667	0.0143333	0.467391	1.13953	1.06727	74.4605	134.299	453.43	41.1896	2.45047
TP2020071601	Oxytropis microphylla	Fabaceae	herb	perennial	0.202	0.0024	0.0005	0.208333	3.8	0.12881	257.62	38.8169	427.917	14.6931	1.54101
TP2020071601	Stipa regeliana	Poaceae	herb	perennial	0.262	0.0144	0.008	0.555556	0.8	0.3722	46.525	214.938	/	/	/
TP2020071601	Alyssum canescens	Brassicaceae	semi-shrub	perennial	0.338	0.0273333	0.00633333	0.231707	3.31579	0.5659	89.3526	111.916	357.682	25.4671	2.99076
TP2020071601	Ajania fruticulosa	Asteraceae	semi-shrub	perennial	0.288	0.0038	0.0012	0.315789	2.16667	0.2015	167.917	59.5533	398.769	13.4457	1.56344
TP2020071602	Stipa purpurea	Poaceae	herb	perennial	0.29	0.0086	0.0046	0.534884	0.869565	0.37074	80.5957	124.076	402.584	15.721	1.71709
TP2020071602	Achnatherum duthiei	Poaceae	herb	perennial	0.226	0.0072	0.0038	0.527778	0.894737	0.55394	145.774	68.5995	388.793	16.613	1.7353
TP2020071602	Alyssum canescens	Brassicaceae	semi-shrub	perennial	0.324	0.011	0.00333333	0.30303	2.3	0.332667	99.8	100.2	341.017	41.7952	3.43871
TP2020071602	Caragana versicolor	Fabaceae	shrub	deciduous	0.178	0.0024	0.0009	0.375	1.66667	0.134	148.889	67.1642	427.082	35.9945	1.76587
TP2020071603	Stipa orientalis	Poaceae	herb	perennial	0.338	0.0192	0.0104	0.541667	0.846154	0.71488	68.7385	145.479	430.818	19.3523	0.791426
TP2020071603	Ajania fruticulosa	Asteraceae	semi-shrub	perennial	0.274	0.005	0.0014	0.28	2.57143	0.23974	171.243	58.3966	449.878	34.8197	2.57553
TP2020071603	Physochlaina praealta	Solanaceae	herb	perennial	0.352	0.772	0.172	0.222798	3.48837	17.4464	101.433	98.5877	328.854	34.1531	1.38911
TP2020071603	Arnebia guttata	Boraginaceae	herb	perennial	0.698	0.1485	0.0345	0.232323	3.30435	2.60945	75.6362	132.212	312.084	19.7647	0.9308
TP2020071701	Ajania fruticulosa	Asteraceae	semi-shrub	perennial	0.286	0.0068	0.002	0.294118	2.4	0.33286	166.43	60.0853	422.181	21.7741	2.87108
TP2020071701	Stipa orientalis	Poaceae	herb	perennial	0.264	0.0253333	0.0133333	0.526316	0.9	0.968733	72.655	137.637	404.169	12.8352	1.30418
TP2020071701	Physochlaina praealta	Solanaceae	herb	perennial	0.41	1.796	0.214	0.119154	7.39252	41.6226	194.498	51.4144	354.067	51.273	6.9728
TP2020071701	Krascheninnikovia ceratoides	Amaranthaceae	semi-shrub	perennial	0.258	0.00633333	0.00333333	0.526316	0.9	0.314767	94.43	105.899	328.189	38.0323	1.97242
TP2020071702	Phyllolobium lasaense	Fabaceae	semi-shrub	perennial	0.2	0.00766667	0.00133333	0.173913	4.75	0.401967	301.475	33.1702	395.379	48.1233	2.07543
TP2020071702	Oxytropis microphylla	Fabaceae	herb	perennial	0.184	0.0024	0.001	0.416667	1.4	0.08796	87.96	113.688	360.413	32.7485	1.98724
TP2020071702	Stipa orientalis	Poaceae	herb	perennial	0.268	0.0126667	0.00566667	0.447368	1.23529	0.5727	101.065	98.9465	403.751	14.3058	1.54792
TP2020071702	Alyssum canescens	Brassicaceae	semi-shrub	perennial	0.29	0.006	0.00133333	0.222222	3.5	0.2053	153.975	64.9456	346.918	24.0182	2.02964
TP2020071703	Stipa orientalis	Poaceae	herb	perennial	0.256	0.0142	0.008	0.56338	0.775	0.62576	78.22	127.845	382.725	12.2301	0.878427
TP2020071703	Krascheninnikovia ceratoides	Amaranthaceae	semi-shrub	perennial	0.374	0.0123333	0.00666667	0.540541	0.85	0.516167	77.425	129.157	367.459	32.6518	1.36704
TP2020071703	Alyssum canescens	Brassicaceae	semi-shrub	perennial	0.408	0.007	0.00166667	0.238095	3.2	0.228833	137.3	72.8332	358.519	23.7358	1.90663
TP2020071801	Carex praeclara	Cyperaceae	herb	perennial	0.292	0.0656667	0.0266667	0.406091	1.4625	2.32437	87.1637	114.727	412.765	18.1553	1.48771
TP2020071801	Achnatherum duthiei	Poaceae	herb	perennial	0.258	0.0046	0.0024	0.521739	0.916667	0.17782	74.0917	134.968	392.424	20.0595	1.71959
TP2020071801	Chamaerhodos sabulosa	Rosaceae	herb	perennial	0.342	0.0012	0.0006	0.5	1	0.04891	81.5167	122.674	352.381	18.5261	1.84994
TP2020071801	Oxytropis pusilla	Fabaceae	herb	perennial	0.248	0.0026	0.001	0.384615	1.6	0.13137	131.37	76.1209	391.958	34.7543	2.07907
TP2020071801	Krascheninnikovia ceratoides	Amaranthaceae	semi-shrub	perennial	0.372	0.0044	0.0014	0.318182	2.14286	0.22758	162.557	61.5168	378.486	33.7579	1.74146
TP2020071801	Phyllolobium heydei	Fabaceae	semi-shrub	perennial	0.17	0.0019	0.0005	0.263158	2.8	0.0881	176.2	56.7537	412.86	32.4775	1.84036
TP2020071801	Oxytropis falcata	Fabaceae	herb	perennial	0.194	0.0016	0.0003	0.1875	4.33333	0.04998	166.6	60.024	417.687	42.4234	2.49877
TP2020071802	Artemisia minor	Asteraceae	semi-shrub	perennial	0.208	0.0013	0.0004	0.307692	2.25	0.08458	211.45	47.2925	438.465	17.2257	2.19558
TP2020071802	Krascheninnikovia ceratoides	Amaranthaceae	semi-shrub	perennial	0.354	0.00466667	0.00166667	0.357143	1.8	0.207783	124.67	80.2118	347.847	31.1386	1.94782
TP2020071802	Alyssum canescens	Brassicaceae	semi-shrub	perennial	0.344	0.01	0.00233333	0.233333	3.28571	0.328433	140.757	71.0444	357.192	30.7588	2.82128
TP2020071802	Carex praeclara	Cyperaceae	herb	perennial	0.28	0.0723333	0.032	0.442396	1.26042	2.7435	85.7344	116.639	416.365	16.2862	1.22607
TP2020071802	Achnatherum duthiei	Poaceae	herb	perennial	0.176	0.0038	0.0022	0.578947	0.727273	0.19418	88.2636	113.297	412.024	19.5535	1.59885
TP2020071803	Stipa orientalis	Poaceae	herb	perennial	0.164	0.007	0.0036	0.514286	0.944444	0.40166	111.572	89.628	405.439	18.6519	1.27285
TP2020071803	Oxytropis microphylla	Fabaceae	herb	perennial	0.15	0.0013	0.0003	0.230769	3.33333	0.03864	128.8	77.6398	324.083	26.8914	1.25838
TP2020071803	Christolea crassifolia	Brassicaceae	herb	perennial	0.488	0.0875	0.0165	0.188571	4.30303	1.81265	109.858	91.0269	348.596	30.2411	1.661
TP2020071803	Ajania fruticulosa	Asteraceae	semi-shrub	perennial	0.256	0.0046	0.0014	0.304348	2.28571	0.23616	168.686	59.2818	411.918	24.5886	1.67771
TP2020071803	Alyssum canescens	Brassicaceae	semi-shrub	perennial	0.346	0.00933333	0.002	0.214286	3.66667	0.292933	146.467	68.2749	354.97	42.6075	3.86035
TP2020071901	Stipa purpurea	Poaceae	herb	perennial	0.334	0.0146667	0.00766667	0.522727	0.913043	0.719233	93.813	106.595	405.501	17.9006	1.40502
TP2020071901	Stipa regeliana	Poaceae	herb	perennial	0.312	0.0126667	0.00766667	0.605263	0.652174	0.606233	79.0739	126.464	353.517	29.3923	1.87336
TP2020071901	Alyssum canescens	Brassicaceae	semi-shrub	perennial	0.746	0.00833333	0.00333333	0.4	1.5	0.301633	90.49	110.509	351.829	28.2065	1.5741
TP2020071901	Oxytropis microphylla	Fabaceae	herb	perennial	0.282	0.0008	0.0001	0.125	7	0.02276	227.6	43.9367	/	/	/
TP2020071901	Phyllolobium lasaense	Fabaceae	semi-shrub	perennial	0.422	0.006	0.00266667	0.444444	1.25	0.342033	128.262	77.9651	412.788	44.5405	1.68225
TP2020071901	Christolea crassifolia	Brassicaceae	herb	perennial	0.596	0.1645	0.0275	0.167173	4.98182	3.08335	112.122	89.1887	344.91	37.4483	2.26566
TP2020071902	Artemisia wellbyi	Asteraceae	semi-shrub	perennial	0.304	0.003	0.0008	0.266667	2.75	0.10968	137.1	72.9395	417.655	19.7766	2.38617
TP2020071902	Oxytropis microphylla	Fabaceae	herb	perennial	0.206	0.0009	0.0004	0.444444	1.25	0.03855	96.375	103.761	342.678	31.4223	1.74974
TP2020071902	Phyllolobium lasaense	Fabaceae	semi-shrub	perennial	0.258	0.00233333	0.001	0.428571	1.33333	0.148333	148.333	67.4157	413.331	48.184	2.09055
TP2020071902	Stipa purpurea	Poaceae	herb	perennial	0.318	0.00933333	0.00533333	0.571429	0.75	0.5613	105.244	95.0175	436.95	11.8713	0.940527
TP2020071902	Alyssum canescens	Brassicaceae	semi-shrub	perennial	0.374	0.00466667	0.00133333	0.285714	2.5	0.209333	157	63.6943	378.493	26.1359	1.4528
TP2020071902	Potentilla bifurca	Rosaceae	herb	perennial	0.258	0.00333333	0.002	0.6	0.666667	0.238433	119.217	83.8809	399.74	13.1781	1.21833
TP2020071903	Phyllolobium lasaense	Fabaceae	semi-shrub	perennial	0.328	0.005	0.00133333	0.266667	2.75	0.2041	153.075	65.3275	402.785	45.1123	2.31592
TP2020071903	Orinus thoroldii	Poaceae	herb	perennial	0.238	0.0293333	0.018	0.613636	0.62963	1.7727	98.4833	101.54	379.277	11.9913	1.29908
TP2020071903	Alyssum canescens	Brassicaceae	semi-shrub	perennial	0.49	0.004	0.00233333	0.583333	0.714286	0.271733	116.457	85.8685	340.953	20.2842	1.44397
TP2020071903	Stipa purpurea	Poaceae	herb	perennial	0.462	0.01	0.008	0.8	0.25	0.6012	75.15	133.067	398.18	11.9265	0.76787
TP2020071904	Oxytropis microphylla	Fabaceae	herb	perennial	0.254	0.0006	0.0003	0.5	1	0.02475	82.5	121.212	370.551	29.4451	1.42687
TP2020071904	Potentilla bifurca	Rosaceae	herb	perennial	0.202	0.005	0.002	0.4	1.5	0.340133	170.067	58.8005	423.475	22.8888	1.5658
TP2020071904	Stipa purpurea	Poaceae	herb	perennial	0.446	0.00833333	0.006	0.72	0.388889	0.375033	62.5056	159.986	439.145	22.1009	1.09716
TP2020071904	Astragalus kuschakevitschii	Fabaceae	herb	perennial	0.234	0.0012	0.0005	0.416667	1.4	0.05134	102.68	97.3899	416.143	35.1767	2.21374
TP2020071904	Oxytropis pusilla	Fabaceae	herb	perennial	0.544	0.0028	0.0012	0.428571	1.33333	0.17304	144.2	69.3481	395.174	35	1.81694
TP2020071904	Dracocephalum heterophyllum	Lamiaceae	herb	perennial	0.328	0.0436667	0.0133333	0.305344	2.275	1.33697	100.272	99.7282	373.866	21.9395	1.56216
TP2020071904	Alyssum canescens	Brassicaceae	semi-shrub	perennial	0.396	0.003	0.00133333	0.444444	1.25	0.368767	276.575	36.1566	338.609	24.7203	1.11108
TP2020071904	Phyllolobium heydei	Fabaceae	semi-shrub	perennial	0.258	0.005	0.00166667	0.333333	2	0.251733	151.04	66.2076	379.089	28.6777	1.27864
TP2020071904	Allium przewalskianum	Amaryllidaceae	herb	perennial	0.704	0.176	0.023	0.130682	6.65217	2.72345	118.411	84.4517	374.529	37.2969	2.7055
TP2020071904	Alyssum canescens	Brassicaceae	semi-shrub	perennial	0.58	0.009	0.00433333	0.481481	1.07692	0.3681	84.9462	117.722	377.274	29.0739	1.54652
TP2020071904	Krascheninnikovia ceratoides	Amaranthaceae	semi-shrub	perennial	0.984	0.011	0.00566667	0.515152	0.941176	0.5452	96.2118	103.937	363.636	28.4204	1.28848
TP2020071905	Caragana versicolor	Fabaceae	shrub	deciduous	0.206	0.0029	0.0013	0.448276	1.23077	0.35502	273.092	36.6177	412.18	34.1631	1.46429
TP2020071905	Potentilla bifurca	Rosaceae	herb	perennial	0.168	0.00466667	0.002	0.428571	1.33333	0.363833	181.917	54.9702	408.013	18.6129	1.12896
TP2020071905	Christolea crassifolia	Brassicaceae	herb	perennial	0.744	0.165	0.0255	0.154545	5.47059	2.75415	108.006	92.5875	412.083	19.857	1.31402
TP2020071905	Stipa penicillata	Poaceae	herb	perennial	0.26	0.0113333	0.00633333	0.558824	0.789474	0.621433	98.1211	101.915	400.296	16.4431	1.33516
TP2020071905	Stipa purpurea	Poaceae	herb	perennial	0.37	0.00733333	0.005	0.681818	0.466667	0.463933	92.7867	107.774	404.061	13.9295	0.88878
TP2020071905	Pachypleurum xizangense	Apiaceae	herb	perennial	0.47	0.00366667	0.00166667	0.454545	1.2	0.159333	95.6	104.603	401.522	26.8512	1.81032
TP2020071905	Dracocephalum heterophyllum	Lamiaceae	herb	perennial	0.434	0.0526667	0.0146667	0.278481	2.59091	1.5577	106.207	94.1559	395.051	21.4574	1.77216
TP2020071905	Achnatherum duthiei	Poaceae	herb	perennial	0.35	0.0143333	0.009	0.627907	0.592593	0.614033	68.2259	146.572	400.276	17.6427	1.0351
TP2020071905	Poa litwinowiana	Poaceae	herb	perennial	0.362	0.0056	0.0046	0.821429	0.217391	0.35586	77.3609	129.264	428.093	9.16959	0.932942
TP2020072001	Alyssum canescens	Brassicaceae	semi-shrub	perennial	0.54	0.011	0.00366667	0.333333	2	0.369633	100.809	99.1974	373.583	30.1454	2.17868
TP2020072001	Caragana versicolor	Fabaceae	shrub	deciduous	0.228	0.0029	0.001	0.344828	1.9	0.1517	151.7	65.9196	426.197	36.3302	1.68674
TP2020072001	Artemisia minor	Asteraceae	semi-shrub	perennial	0.0342	0.0016	0.0002	0.125	7	0.05938	296.9	33.6814	410.075	22.0284	2.26046
TP2020072001	Stipa purpurea	Poaceae	herb	perennial	0.306	0.01	0.00533333	0.533333	0.875	0.3981	74.6437	133.97	406.442	15.7562	1.68779
TP2020072001	Aster boweri	Asteraceae	herb	perennial	0.316	0.013	0.00433333	0.333333	2	0.5929	136.823	73.0871	368.773	27.0109	4.14633
TP2020072001	Krascheninnikovia ceratoides	Amaranthaceae	semi-shrub	perennial	0.548	0.0126667	0.005	0.394737	1.53333	0.706	141.2	70.8215	348.739	26.6839	2.22258
TP2020072001	Oxytropis microphylla	Fabaceae	herb	perennial	0.164	0.0024	0.0009	0.375	1.66667	0.10355	115.056	86.9145	386.533	36.0429	1.60001
TP2020072001	Chamaerhodos sabulosa	Rosaceae	herb	perennial	0.246	0.0016	0.0002	0.125	7	0.08122	406.1	24.6245	337.739	15.7705	1.67671
TP2020072001	Potentilla bifurca	Rosaceae	herb	perennial	0.24	0.00566667	0.00266667	0.470588	1.125	0.472567	177.213	56.4294	389.419	22.1084	1.58598
TP2020072001	Achnatherum duthiei	Poaceae	herb	perennial	0.334	0.011	0.00566667	0.515152	0.941176	0.724533	127.859	78.2113	415.168	28.7137	2.60166
TP2020072002	Artemisia wellbyi	Asteraceae	semi-shrub	perennial	0.244	0.0038	0.0012	0.315789	2.16667	0.27498	229.15	43.6395	429.503	13.6492	1.28737
TP2020072002	Stipa purpurea	Poaceae	herb	perennial	0.336	0.0223333	0.013	0.58209	0.717949	0.866233	66.6333	150.075	419.615	14.2684	1.28636
TP2020072002	Alyssum canescens	Brassicaceae	semi-shrub	perennial	0.63	0.012	0.00333333	0.277778	2.6	0.426967	128.09	78.0701	367.083	29.7146	2.72204
TP2020072101	Phyllolobium lasaense	Fabaceae	semi-shrub	perennial	0.15	0.00333333	0.000333333	0.1	9	0.344133	103.24	96.8617	418.31	49.4214	2.67719
TP2020072101	Artemisia stracheyi	Asteraceae	herb	perennial	0.12	0.000433333	0.000133333	0.307692	2.25	0.0464267	348.2	28.7191	418.195	27.4825	2.80235
TP2020072101	Alyssum canescens	Brassicaceae	semi-shrub	perennial	0.404	0.00866667	0.002	0.230769	3.33333	0.3652	182.6	54.7645	353.4	28.1707	2.64047
TP2020072101	Stipa purpurea	Poaceae	herb	perennial	0.264	0.012	0.00566667	0.472222	1.11765	0.524667	92.5882	108.005	429.873	20.3552	1.86048
TP2020072101	Potentilla bifurca	Rosaceae	herb	perennial	0.214	0.00633333	0.00133333	0.210526	3.75	0.402167	301.625	33.1538	420	24.1427	1.98586
TP2020072101	Lasiocaryum densiflorum	Boraginaceae	herb	annual	0.204	0.0036	0.0008	0.222222	3.5	0.21718	271.475	36.8358	362.727	14.6756	2.23951
TP2020072101	Oxytropis microphylla	Fabaceae	herb	perennial	0.2	0.0014	0.0004	0.285714	2.5	0.05293	132.325	75.5715	415.472	38.0023	2.33042
TP2020072101	Carex praeclara	Cyperaceae	herb	perennial	0.236	0.1395	0.06	0.430108	1.325	4.5152	75.2533	132.884	410.915	18.2263	1.31784
TP2020072101	Elsholtzia eriostachya	Lamiaceae	herb	annual	0.212	0.0186667	0.004	0.214286	3.66667	1.03447	258.617	38.6673	404.151	23.7689	2.03206
TP2020072101	Chenopodium karoi	Amaranthaceae	herb	annual	0.292	0.011	0.00366667	0.333333	2	0.7413	202.173	49.4627	278.222	17.1254	1.79678
TP2020072102	Stipa purpurea	Poaceae	herb	perennial	0.266	0.00766667	0.00433333	0.565217	0.769231	0.315733	72.8615	137.247	425.419	16.5259	1.52078
TP2020072102	Alyssum canescens	Brassicaceae	semi-shrub	perennial	0.382	0.00533333	0.00166667	0.3125	2.2	0.2046	122.76	81.4598	359.61	23.4963	2.64235
TP2020072102	Chamaerhodos sabulosa	Rosaceae	herb	perennial	0.188	0.0016	0.001	0.625	0.6	0.09784	97.84	102.208	357.162	11.4617	1.88803
TP2020072103	Stipa purpurea	Poaceae	herb	perennial	0.26	0.0106667	0.006	0.5625	0.777778	0.526367	87.7278	113.989	401.958	14.2321	1.43629
TP2020072103	Artemisia minor	Asteraceae	semi-shrub	perennial	0.146	0.0014	0.0002	0.142857	6	0.12028	601.4	16.6279	427.77	18.2089	2.25613
TP2020072103	Alyssum canescens	Brassicaceae	semi-shrub	perennial	0.434	0.009	0.00266667	0.296296	2.375	0.314767	118.037	84.7188	353.961	26.9984	3.63911
TP2020072103	Achnatherum duthiei	Poaceae	herb	perennial	0.268	0.00733333	0.004	0.545455	0.833333	0.555233	138.808	72.0418	397.843	15.5827	1.60432
TP2020072103	Artemisia wellbyi	Asteraceae	semi-shrub	perennial	0.19	0.00333333	0.000333333	0.1	9	0.129733	389.2	25.6937	426.852	31.8922	3.80958
TP2020072103	Potentilla bifurca	Rosaceae	herb	perennial	0.222	0.008	0.00333333	0.416667	1.4	0.469667	140.9	70.9723	398.261	18.3589	2.86444
TP2020072104	Oxytropis microphylla	Fabaceae	herb	perennial	0.206	0.00163265	0.000408163	0.25	3	0.0825612	202.275	49.4376	403.944	42.9337	2.38653
TP2020072104	Artemisia stracheyi	Asteraceae	herb	perennial	0.21	0.0003	0.0001	0.333333	2	0.16365	163.7	61.0874	444.348	26.5495	3.50051
TP2020072104	Potentilla bifurca	Rosaceae	herb	perennial	0.226	0.008	0.00333333	0.416667	1.4	0.4342	130.26	76.7695	395.541	22.0117	1.57198
TP2020072104	Stipa purpurea	Poaceae	herb	perennial	0.226	0.009	0.005	0.555556	0.8	0.380333	76.0667	131.464	423.971	17.4307	1.70984
TP2020072104	Alyssum canescens	Brassicaceae	semi-shrub	perennial	0.446	0.00833333	0.00133333	0.16	5.25	0.331033	248.275	40.2779	358.75	27.9622	3.45404
TP2020072104	Saussurea andryaloides	Asteraceae	herb	perennial	0.256	0.064	0.0213333	0.333333	2	1.62553	76.1969	131.239	398.261	24.9623	2.06051
TP2020072104	Aster boweri	Asteraceae	herb	perennial	0.21	0.007	0.00233333	0.333333	2	0.342633	146.843	68.1	379.51	26.7342	3.15409
TP2020072201	Potentilla parvifolia	Rosaceae	shrub	deciduous	0.132	0.0027	0.0013	0.481481	1.07692	0.23292	179.169	55.8132	437.113	20.7418	1.61109
TP2020072201	Carex moorcroftii	Cyperaceae	herb	perennial	0.254	0.037	0.0163333	0.441441	1.26531	1.44307	88.351	113.185	417.516	22.5107	1.0553
TP2020072201	Elymus nutans	Poaceae	herb	perennial	0.192	0.041	0.017	0.414634	1.41176	1.2541	73.7706	135.555	421.589	26.6364	1.02033
TP2020072201	Potentilla bifurca	Rosaceae	herb	perennial	0.156	0.00633333	0.00266667	0.421053	1.375	0.461367	173.012	57.7993	406.531	29.8649	2.45632
TP2020072201	Leontopodium nanum	Asteraceae	herb	perennial	0.19	0.0042	0.002	0.47619	1.1	0.33072	165.36	60.4741	401.096	20.4845	1.35734
TP2020072201	Potentilla saundersiana	Rosaceae	herb	perennial	0.27	0.008	0.00366667	0.458333	1.18182	0.437033	119.191	83.899	402.802	28.2677	1.51816
TP2020072201	Carex montis-everesti	Cyperaceae	herb	perennial	0.14	0.00666667	0.00333333	0.5	1	0.3886	116.58	85.778	416.433	20.8433	1.08862
TP2020072201	Oxytropis proboscidea	Fabaceae	herb	perennial	0.216	0.0027	0.001	0.37037	1.7	0.17166	171.66	58.2547	395.25	32.62	1.84436
TP2020072201	Rhodiola bupleuroides	Crassulaceae	herb	perennial	0.378	0.029	0.00533333	0.183908	4.4375	0.703333	131.875	75.8294	386.029	35.3901	2.98954
TP2020072202	Carex praeclara	Cyperaceae	herb	perennial	0.172	0.089	0.042	0.47191	1.11905	3.346	79.6667	125.523	393.679	20.0117	1.99774
TP2020072202	Saussurea andryaloides	Asteraceae	herb	perennial	0.21	0.06	0.0235	0.391667	1.55319	1.64395	69.9553	142.948	392.969	26.2432	2.58496
TP2020072202	Phyllolobium heydei	Fabaceae	semi-shrub	perennial	0.178	0.0027	0.0011	0.407407	1.45455	0.16257	147.791	67.6632	368.043	33.3307	2.59043
TP2020072202	Stipa purpurea	Poaceae	herb	perennial	0.23	0.00733333	0.00366667	0.5	1	0.3219	87.7909	113.907	397.169	19.4733	1.79902
TP2020072202	Potentilla parvifolia	Rosaceae	shrub	deciduous	0.166	0.0017	0.0009	0.529412	0.888889	0.1218	135.333	73.8916	415.27	20.7765	2.86806
TP2020072202	Dracocephalum heterophyllum	Lamiaceae	herb	perennial	0.346	0.027	0.00866667	0.320988	2.11538	0.842967	97.2654	102.811	388.322	25.0631	2.13271
TP2020072203	Artemisia wellbyi	Asteraceae	semi-shrub	perennial	0.268	0.0022	0.0002	0.0909091	10	0.10748	537.4	18.6081	412.894	21.0966	2.98544
TP2020072203	Artemisia minor	Asteraceae	semi-shrub	perennial	0.2	0.001	0.0002	0.2	4	0.25096	125.5	79.6813	424.409	17.6808	2.50269
TP2020072203	Stipa purpurea	Poaceae	herb	perennial	0.234	0.00666667	0.00333333	0.5	1	0.283667	85.1	117.509	395.932	19.3594	0.957563
TP2020072203	Potentilla bifurca	Rosaceae	herb	perennial	0.212	0.00633333	0.00266667	0.421053	1.375	0.452467	169.675	58.9362	406.158	20.1325	2.12294
TP2020072301	Stipa purpurea	Poaceae	herb	perennial	0.238	0.008	0.00433333	0.541667	0.846154	0.323733	74.7077	133.855	/	/	/
TP2020072301	Lasiocaryum densiflorum	Boraginaceae	herb	annual	0.296	0.004	0.0008	0.2	4	0.25646	320.575	31.1939	343.874	16.6891	2.32693
TP2020072301	Potentilla parvifolia	Rosaceae	shrub	deciduous	0.194	0.0014	0.0005	0.357143	1.8	0.07804	156.08	64.0697	416.364	20.7284	2.3029
TP2020072301	Potentilla bifurca	Rosaceae	herb	perennial	0.202	0.00466667	0.002	0.428571	1.33333	0.346433	173.217	57.7312	410.726	17.2882	2.49404
TP2020072302	Chamaerhodos sabulosa	Rosaceae	herb	perennial	0.206	0.0012	0.0008	0.666667	0.5	0.11134	139.175	71.852	364.242	10.436	2.15076
TP2020072302	Stipa purpurea	Poaceae	herb	perennial	0.314	0.013	0.007	0.538462	0.857143	0.6033	86.1857	116.029	419.111	12.642	1.38856
TP2020072303	Artemisia vestita	Asteraceae	semi-shrub	perennial	0.188	0.0042	0.0014	0.333333	2	0.380433	271.738	36.8001	441	24.1703	3.31261
TP2020072303	Artemisia wellbyi	Asteraceae	semi-shrub	perennial	0.33	0.003	0.0008	0.266667	2.75	0.11702	146.275	68.3644	425.703	21.8455	2.97415
TP2020072303	Oxytropis proboscidea	Fabaceae	herb	perennial	0.29	0.0046	0.0028	0.608696	0.642857	0.30902	110.364	90.609	386.363	27.3234	1.51881
TP2020072304	Artemisia wellbyi	Asteraceae	semi-shrub	perennial	0.346	0.0056	0.0014	0.25	3	0.16446	117.471	85.1271	407.533	20.3666	2.17771
TP2020072304	Orinus thoroldii	Poaceae	herb	perennial	0.174	0.0216667	0.0116667	0.538462	0.857143	1.13157	96.9914	103.102	390.807	15.5525	1.50715
TP2020072305	Oxytropis proboscidea	Fabaceae	herb	perennial	0.246	0.0038	0.0014	0.368421	1.71429	0.24726	176.614	56.6206	399.588	27.0202	1.62829
TP2020072305	Phyllolobium lasaense	Fabaceae	semi-shrub	perennial	0.194	0.008	0.00266667	0.333333	2	0.4868	182.55	54.7795	406.008	46.2867	2.13251
TP2020072305	Orinus thoroldii	Poaceae	herb	perennial	0.18	0.039	0.0186667	0.478632	1.08929	1.54513	82.775	120.809	370.671	17.8642	1.29854
TP2020072305	Kobresia royleana	Cyperaceae	herb	perennial	0.284	0.01	0.00633333	0.633333	0.578947	0.546967	86.3632	115.79	415.544	13.4302	0.814406
TP2020072305	Stipa purpurea	Poaceae	herb	perennial	0.216	0.00766667	0.00433333	0.565217	0.769231	0.799467	184.492	54.2028	414.799	12.6604	1.03671
TP2020072401	Potentilla parvifolia	Rosaceae	shrub	deciduous	0.216	0.0013	0.0007	0.538462	0.857143	0.06635	94.7857	105.501	383.731	18.1783	1.62127
TP2020072401	Leontopodium nanum	Asteraceae	herb	perennial	0.324	0.00966667	0.00333333	0.344828	1.9	0.5695	170.85	58.5309	397.139	20.2595	1.39798
TP2020072401	Phyllolobium heydei	Fabaceae	semi-shrub	perennial	0.0264	0.003	0.001	0.333333	2	0.2656	265.6	37.6506	410.117	28.0932	1.14263
TP2020072401	Stipa purpurea	Poaceae	herb	perennial	0.224	0.005	0.00266667	0.533333	0.875	0.2407	90.2625	110.788	405.748	17.3077	0.946802
TP2020072401	Kobresia royleana	Cyperaceae	herb	perennial	0.388	0.0156667	0.007	0.446809	1.2381	0.512267	73.181	136.648	407.115	17.7989	0.762803
TP2020072401	Kobresia robusta	Cyperaceae	herb	perennial	0.384	0.0163333	0.00766667	0.469388	1.13043	0.511167	66.6739	149.984	383.51	22.6019	0.838588
TP2020072401	Dracocephalum heterophyllum	Lamiaceae	herb	perennial	0.494	0.048	0.013	0.270833	2.69231	1.2382	95.2462	104.991	365.117	25.6767	1.38912
TP2020072401	Saussurea andryaloides	Asteraceae	herb	perennial	0.354	0.0716667	0.0246667	0.344186	1.90541	1.8687	75.7581	131.999	413.382	28.8953	2.63928
TP2020072402	Carex praeclara	Cyperaceae	herb	perennial	0.282	0.098	0.0446667	0.455782	1.19403	2.65367	59.4104	168.321	313.133	15.1758	1.10196
TP2020072402	Leontopodium pusillum	Asteraceae	herb	perennial	0.31	0.00933333	0.00366667	0.392857	1.54545	1.7246	470.345	21.261	503.275	18.2951	1.49415
TP2020072402	Dracocephalum heterophyllum	Lamiaceae	herb	perennial	0.51	0.0633333	0.0173333	0.273684	2.65385	1.7246	99.4962	100.506	375.882	23.8386	1.77702
TP2020072402	Anthoxanthum potaninii	Poaceae	herb	perennial	0.26	0.107333	0.0406667	0.378882	1.63934	3.16203	77.7549	128.609	426.221	16.8806	1.56641
TP2020072402	Saussurea andryaloides	Asteraceae	herb	perennial	0.268	0.0773333	0.027	0.349138	1.8642	2.0858	77.2519	129.447	421.963	26.662	2.61379
TP2020072402	Stipa purpurea	Poaceae	herb	perennial	0.19	0.00633333	0.003	0.473684	1.11111	0.238333	79.4444	125.874	423.866	15.8965	1.67506
TP2020072402	Thermopsis inflata	Fabaceae	herb	perennial	0.264	0.076	0.023	0.302632	2.30435	2.615	113.696	87.9541	423.784	31.0249	2.12491
TP2020072403	Carex praeclara	Cyperaceae	herb	perennial	0.256	0.0743333	0.0346667	0.466368	1.14423	2.55843	73.801	135.5	457.384	17.2678	1.12388
TP2020072403	Stipa purpurea	Poaceae	herb	perennial	0.208	0.00366667	0.002	0.545455	0.833333	0.1798	89.9	111.235	446.442	17.9466	1.14577
TP2020072403	Achnatherum duthiei	Poaceae	herb	perennial	0.26	0.00633333	0.003	0.473684	1.11111	0.476767	158.922	62.9239	441.681	16.2343	1.18536
TP2020072403	Alyssum canescens	Brassicaceae	semi-shrub	perennial	0.374	0.0136667	0.00333333	0.243902	3.1	0.381867	114.56	87.2905	358.723	32.87	2.41377
TP2020072404	Alyssum canescens	Brassicaceae	semi-shrub	perennial	0.38	0.00733333	0.00233333	0.318182	2.14286	0.300133	128.629	77.7432	360.503	25.7924	1.73432
TP2020072404	Achnatherum duthiei	Poaceae	herb	perennial	0.266	0.0136667	0.007	0.512195	0.952381	0.505667	72.2381	138.431	422.51	18.5472	2.35914
TP2020072404	Stipa purpurea	Poaceae	herb	perennial	0.254	0.007	0.00366667	0.52381	0.909091	0.3091	84.3	118.624	431.904	19.3623	2.06274
TP2020072404	Oxytropis proboscidea	Fabaceae	herb	perennial	0.282	0.0056	0.0016	0.285714	2.5	0.32486	203.037	49.252	437.494	32.8475	2.24547
TP2020072404	Euphorbia tibetica	Euphorbiaceae	herb	perennial	0.28	0.0136667	0.003	0.219512	3.55556	0.6233	207.767	48.1309	447.196	30.9148	3.15304
TP2020072404	Oxytropis microphylla	Fabaceae	herb	perennial	0.166	0.0012	0.0004	0.333333	2	0.03808	95.2	105.042	339.069	16.7458	1.08006
TP2020072501	Achnatherum duthiei	Poaceae	herb	perennial	0.118	0.00633333	0.004	0.631579	0.583333	0.251833	62.9583	158.835	440.669	15.522	1.09188
TP2020072501	Alyssum canescens	Brassicaceae	semi-shrub	perennial	0.326	0.00466667	0.002	0.428571	1.33333	0.199533	99.7667	100.234	379.757	23.1852	1.35052
TP2020072501	Stipa purpurea	Poaceae	herb	perennial	0.202	0.009	0.00566667	0.62963	0.588235	0.325367	57.4176	174.162	422.662	14.9644	0.96275
TP2020072502	Artemisia wellbyi	Asteraceae	semi-shrub	perennial	0.284	0.00433333	0.000333333	0.0769231	12	0.144433	433.3	23.0787	418.615	19.3902	2.62091
TP2020072502	Krascheninnikovia ceratoides	Amaranthaceae	semi-shrub	perennial	0.28	0.0106667	0.00366667	0.34375	1.90909	0.399867	109.055	91.6972	381.321	31.0432	1.81356
TP2020072502	Leymus secalinus	Poaceae	herb	perennial	0.324	0.164	0.063	0.384146	1.60317	6.7319	106.856	93.5843	430.131	26.3293	1.35627
TP2020072502	Achnatherum duthiei	Poaceae	herb	perennial	0.182	0.008	0.00433333	0.541667	0.846154	0.2894	66.7846	149.735	437.899	16.7058	1.33964
TP2020072503	Oxytropis microphylla	Fabaceae	herb	perennial	0.16	0.0009	0.0001	0.111111	8	0.02757	275.7	36.2713	401.022	29.0977	1.32615
TP2020072503	Stipa purpurea	Poaceae	herb	perennial	0.252	0.00666667	0.00366667	0.55	0.818182	0.239767	65.3909	152.926	424.943	16.5404	1.38144
TP2020072503	Alyssum canescens	Brassicaceae	semi-shrub	perennial	0.284	0.00966667	0.00266667	0.275862	2.625	0.324767	121.788	82.1102	356.561	36.5301	2.42137
TP2020072503	Achnatherum duthiei	Poaceae	herb	perennial	0.12	0.00333333	0.002	0.6	0.666667	0.154467	77.2333	129.478	435.346	17.6319	1.79813
TP2020072504	Potentilla bifurca	Rosaceae	herb	perennial	0.194	0.002	0.000333333	0.166667	5	0.170867	512.6	19.5084	414.099	19.5127	1.57766
TP2020072504	Achnatherum duthiei	Poaceae	herb	perennial	0.186	0.00466667	0.002	0.428571	1.33333	0.187667	93.8333	106.572	402.303	12.1025	1.33001
TP2020072504	Stipa purpurea	Poaceae	herb	perennial	0.206	0.005	0.00266667	0.533333	0.875	0.242	90.75	110.193	439.854	14.7945	1.22595
TP2020072504	Alyssum canescens	Brassicaceae	semi-shrub	perennial	0.336	0.00366667	0.000333333	0.0909091	10	0.212733	638.2	15.6691	371.097	19.8942	1.67021
TP2020072505	Alyssum canescens	Brassicaceae	semi-shrub	perennial	0.332	0.012	0.00266667	0.222222	3.5	0.420033	157.513	63.487	387.166	28.1435	1.84813
TP2020072505	Potentilla bifurca	Rosaceae	herb	perennial	0.202	0.00333333	0.00133333	0.4	1.5	0.273867	205.4	48.6855	409.574	16.8199	1.82114
TP2020072505	Kobresia royleana	Cyperaceae	herb	perennial	0.264	0.009	0.00433333	0.481481	1.07692	0.342533	79.0462	126.508	446.611	10.8008	0.835968
TP2020072505	Stipa purpurea	Poaceae	herb	perennial	0.142	0.00633333	0.003	0.473684	1.11111	0.239333	79.7778	125.348	396.173	14.8477	1.11716
TP2020072601	Potentilla bifurca	Rosaceae	herb	perennial	0.192	0.008	0.003	0.375	1.66667	0.491533	163.844	61.0335	403.424	22.7575	2.17186
TP2020072601	Stipa purpurea	Poaceae	herb	perennial	0.142	0.007	0.00366667	0.52381	0.909091	0.5505	150.136	66.6061	411.279	17.0075	1.41114
TP2020072601	Phyllolobium heydei	Fabaceae	semi-shrub	perennial	0.208	0.005	0.000666667	0.133333	6.5	0.276267	414.4	24.1313	395.654	26.0673	1.35419
TP2020072601	Leontopodium pusillum	Asteraceae	herb	perennial	0.214	0.014	0.00433333	0.309524	2.23077	0.7691	177.485	56.3429	375.831	18.7855	1.47677
TP2020073001	Lactuca tatarica	Asteraceae	herb	perennial	0.658	0.72	0.118	0.163889	5.10169	10.3676	87.861	113.816	337.142	14.3232	1.80395
TP2020073001	Phragmites australis	Poaceae	herb	perennial	0.338	0.878	0.367	0.417995	1.39237	27.1156	73.8845	135.346	355.518	26.5624	1.58103
TP2020073001	Sphaerophysa salsula	Fabaceae	herb	perennial	0.362	0.02	0.00466667	0.233333	3.28571	0.737833	158.107	63.2482	406.64	41.9507	1.97747
TP2020073001	Leymus paboanus	Poaceae	herb	perennial	0.148	0.062	0.023	0.370968	1.69565	4.2296	183.896	54.3787	375.756	14.4304	1.72388
TP2020073001	Calamagrostis pseudophragmites	Poaceae	herb	perennial	0.29	0.087	0.043	0.494253	1.02326	4.8772	113.423	88.1653	352.193	17.1021	1.09528
TP2020073001	Suaeda corniculata	Amaranthaceae	herb	annual	1.09	0.0436667	0.00433333	0.0992366	9.07692	0.653767	150.869	66.2826	272.935	20.3765	3.81779
TP2020073001	Taraxacum bicorne	Asteraceae	herb	perennial	0.25	0.473	0.064	0.135307	6.39062	5.2363	81.8172	122.224	329.922	16.7696	1.37163
TP2020073001	Tamarix hohenackeri	Tamaricaceae	shrub	deciduous	0.138	0.0006	0.0003	0.5	1	0.02893	96.4333	103.699	350.105	27.0146	2.83867
TP2020073001	Apocynum pictum	Apocynaceae	semi-shrub	perennial	0.41	0.419	0.096	0.229117	3.36458	11.1816	116.475	85.8553	375.621	17.7065	1.77562
TP2020073001	Lepidium latifolium	Brassicaceae	herb	perennial	0.878	0.817	0.14	0.171359	4.83571	9.384	67.0286	149.19	321.849	23.1632	1.82393
TP2020073001	Nitraria sibirica	Nitrariaceae	shrub	deciduous	0.398	0.0773333	0.0113333	0.146552	5.82353	1.30643	115.274	86.7502	355.781	28.0277	2.01473
TP2020073002	Phragmites australis	Poaceae	herb	perennial	0.184	0.432	0.189	0.4375	1.28571	12.8542	68.0116	147.034	400.18	30.986	2.11559
TP2020073002	Tamarix hohenackeri	Tamaricaceae	shrub	deciduous	0.134	0.0003	0.0001	0.333333	2	0.0141	141	70.922	389.016	31.5554	2.11748
TP2020073003	Phragmites australis	Poaceae	herb	perennial	0.332	0.945	0.39	0.412698	1.42308	32.7822	84.0569	118.967	409.545	20.5955	0.944831
TP2020073003	Tamarix hohenackeri	Tamaricaceae	shrub	deciduous	0.178	0.0003	0.0001	0.333333	2	0.0132	132	75.7576	398.795	18.959	1.24631
TP2020073004	Phragmites australis	Poaceae	herb	perennial	0.26	0.725	0.318	0.438621	1.27987	17.092	53.7484	186.052	387.277	29.5029	1.0863
TP2020073005	Krascheninnikovia ceratoides	Amaranthaceae	semi-shrub	perennial	0.22	0.0167857	0.00571429	0.340426	1.9375	0.526321	92.1063	108.57	341.396	20.8517	1.0735
TP2020073101	Nitraria sibirica	Nitrariaceae	shrub	deciduous	0.654	0.1985	0.0435	0.219144	3.56322	2.70525	62.1897	160.798	350.92	34.0178	1.29169
TP2020073102	Krascheninnikovia ceratoides	Amaranthaceae	semi-shrub	perennial	0.414	0.01	0.00433333	0.433333	1.30769	0.535833	123.654	80.8709	350.749	30.952	1.61212
TP2020073103	Sympegma regelii	Amaranthaceae	semi-shrub	perennial	1.276	0.0133333	0.002	0.15	5.66667	0.186	93	107.527	288.472	22.9896	0.906156
TP2020073103	Krascheninnikovia ceratoides	Amaranthaceae	semi-shrub	perennial	0.478	0.00666667	0.00266667	0.4	1.5	0.313367	117.513	85.0973	355.085	20.7812	1.17795
TP2020080101	Phragmites australis	Poaceae	herb	perennial	0.244	0.298	0.157	0.526846	0.898089	11.9908	76.3745	130.934	417.297	27.6352	1.17291
TP2020080102	Sympegma regelii	Amaranthaceae	semi-shrub	perennial	0.806	0.007	0.002	0.285714	2.5	0.1337	66.85	149.589	318.338	23.7288	1.03226
TP2020080103	Phragmites australis	Poaceae	herb	perennial	0.292	0.335	0.19	0.567164	0.763158	11.6038	61.0726	163.739	367.913	20.375	0.792107
TP2020080104	Phragmites australis	Poaceae	herb	perennial	0.306	0.27	0.118	0.437037	1.28814	7.7432	65.6203	152.392	371.366	17.3764	0.997705
TP2020080104	Tamarix hohenackeri	Tamaricaceae	shrub	deciduous	0.252	0.0003	0.0001	0.333333	2	0.01085	108.5	92.1659	335.628	18.5731	1.04006
TP2020080105	Phragmites australis	Poaceae	herb	perennial	0.234	0.346	0.165	0.476879	1.09697	14.4135	87.3545	114.476	418.694	22.5533	1.21506
TP2020080105	Tamarix hohenackeri	Tamaricaceae	shrub	deciduous	0.204	0.0002	0.0001	0.5	1	0.01831	183.1	54.615	353.178	26.3117	2.58997
TP2020080105	Lycium ruthenicum	Solanaceae	shrub	deciduous	0.864	0.0106667	0.00233333	0.21875	3.57143	0.216133	92.6286	107.958	326.799	17.5	2.23077
TP2020080105	Nitraria sibirica	Nitrariaceae	shrub	deciduous	0.656	0.0466667	0.0106667	0.228571	3.375	0.970633	90.9969	109.894	359.502	38.4718	2.00439
TP2020080105	Lepidium latifolium	Brassicaceae	herb	perennial	0.602	0.608947	0.124211	0.203976	3.90254	11.379	91.6106	109.158	374.028	22.5887	1.4928
TP2020080105	Sphaerophysa salsula	Fabaceae	herb	perennial	0.396	0.026	0.007	0.269231	2.71429	0.966667	138.095	72.4138	370.667	42.2366	1.75893
TP2020080105	Zygophyllum fabago	Zygophyllaceae	herb	perennial	0.596	0.301	0.058	0.192691	4.18966	4.0229	69.3603	144.175	345.965	24.9077	2.23666
TP2020080106	Atraphaxis bracteata	Polygonaceae	shrub	deciduous	0.412	0.0223333	0.0106667	0.477612	1.09375	0.6972	65.3625	152.993	370.027	18.4067	0.833688
TP2020080106	Artemisia desertorum	Asteraceae	herb	perennial	0.288	0.00133333	0.000333333	0.25	3	0.0301667	90.5	110.497	411.256	24.7278	2.38469
TP2020080107	Artemisia xerophytica	Asteraceae	shrub	deciduous	0.284	0.0018	0.0004	0.222222	3.5	0.15768	394.2	25.3678	293.712	28.1239	1.48067
TP2020080107	Sympegma regelii	Amaranthaceae	semi-shrub	perennial	1.52	0.0463333	0.00766667	0.165468	5.04348	0.3881	50.6217	197.544	/	/	/
TP2020080107	Reaumuria soongarica	Tamaricaceae	shrub	deciduous	0.324	0.0013	0.0008	0.615385	0.625	0.02731	34.1375	292.933	321.399	19.3204	1.10054
TP2020080107	Krascheninnikovia ceratoides	Amaranthaceae	semi-shrub	perennial	0.612	0.0413333	0.0133333	0.322581	2.1	1.1755	88.1625	113.427	304.811	33.2296	1.37776
TP2020080107	Artemisia desertorum	Asteraceae	herb	perennial	0.316	0.002	0.000333333	0.166667	5	0.0607667	182.3	54.8546	448.928	29.4229	2.47163
TP2020080201	Asterothamnus centraliasiaticus	Asteraceae	semi-shrub	deciduous	0.36	0.007	0.003	0.428571	1.33333	0.336967	112.322	89.0296	409.269	22.4874	2.25558
TP2020080201	Krascheninnikovia ceratoides	Amaranthaceae	semi-shrub	perennial	0.342	0.027	0.0106667	0.395062	1.53125	0.976833	91.5781	109.196	329.217	21.0129	1.24427
TP2020080201	Askellia flexuosa	Asteraceae	herb	perennial	0.35	0.0363333	0.00666667	0.183486	4.45	1.11117	166.675	59.997	395.284	27.7852	2.03584
TP2020080202	Sympegma regelii	Amaranthaceae	semi-shrub	perennial	1.024	0.00966667	0.002	0.206897	3.83333	0.187967	93.9833	106.402	268.631	28.2188	1.19518
TP2020080202	Reaumuria soongarica	Tamaricaceae	shrub	deciduous	0.458	0.0004	0.0001	0.25	3	0.00887	88.7	112.74	346.079	25.2996	1.10028
TP2020080203	Corethrodendron multijugum	Fabaceae	semi-shrub	perennial	0.33	0.017	0.00566667	0.333333	2	0.6268	110.612	90.4063	391.383	30.7137	1.42516
TP2020080203	Sympegma regelii	Amaranthaceae	semi-shrub	perennial	0.758	0.0113333	0.00266667	0.235294	3.25	0.211733	79.4	125.945	277.584	27.5724	1.36354
TP2020080203	Asterothamnus centraliasiaticus	Asteraceae	semi-shrub	deciduous	0.312	0.0213333	0.005	0.234375	3.26667	0.637767	127.553	78.3986	415.887	26.365	2.18694
TP2020080203	Scorzonera pseudodivaricata	Asteraceae	herb	perennial	0.378	0.0205	0.006	0.292683	2.41667	0.66825	111.375	89.7868	385.096	26.1951	1.85252
TP2020080203	Stipa tianschanica var. gobica	Poaceae	herb	perennial	0.364	0.0395	0.0175	0.443038	1.25714	1.2903	73.7314	135.627	412.977	27.8441	2.02756
TP2020080204	Apocynum pictum	Apocynaceae	semi-shrub	perennial	0.578	0.2745	0.075	0.273224	2.66	6.26305	83.5073	119.75	378.122	12.1524	1.64292
TP2020080204	Phragmites australis	Poaceae	herb	perennial	0.304	0.499	0.212	0.42485	1.35377	15.0876	71.1679	140.513	362.259	15.816	1.18319
TP2020080204	Kalidium foliatum	Amaranthaceae	shrub	deciduous	2.018	0.0563333	0.008	0.142012	6.04167	0.473533	59.1917	168.943	351.549	25.4647	1.90071
TP2020080204	Nitraria sibirica	Nitrariaceae	shrub	deciduous	0.492	0.055	0.00933333	0.169697	4.89286	0.9906	106.136	94.219	342.572	19.9055	1.18004
TP2020080301	Sympegma regelii	Amaranthaceae	semi-shrub	perennial	0.2108	0.00367347	0.000816327	0.222222	3.5	0.0728776	89.275	112.013	377.441	24.7628	1.62255
TP2020080302	Nitraria sibirica	Nitrariaceae	shrub	deciduous	0.636	0.0936667	0.0233333	0.24911	3.01429	1.66387	71.3086	140.236	/	/	/
TP2020080302	Tamarix hohenackeri	Tamaricaceae	shrub	deciduous	0.0468	0.0004	0.0001	0.25	3	0.01345	134.5	74.3494	357.35	10.2202	0.713885
TP2020080302	Krascheninnikovia ceratoides	Amaranthaceae	semi-shrub	perennial	0.372	0.0126667	0.00566667	0.447368	1.23529	0.540967	95.4647	104.751	337.35	22.7984	1.34572
TP2020080303	Phragmites australis	Poaceae	herb	perennial	0.204	0.351	0.158	0.450142	1.22152	13.6317	86.2766	115.906	402.752	18.5221	1.10585
TP2020080303	Tamarix hohenackeri	Tamaricaceae	shrub	deciduous	0.068	0.0006	0.0003	0.5	1	0.02561	85.3667	117.142	330.726	13.8133	1.45781
TP2020080303	Lycium dasystemum	Solanaceae	shrub	deciduous	0.422	0.0636667	0.013	0.204188	3.89744	1.2405	95.4231	104.796	346.369	18.6758	3.80157
TP2020080303	Nitraria sibirica	Nitrariaceae	shrub	deciduous	0.686	0.0866667	0.0133333	0.153846	5.5	1.45287	108.965	91.7726	349.863	29.478	2.33646
TP2020080303	Lycium ruthenicum	Solanaceae	shrub	deciduous	0.784	0.0203333	0.00466667	0.229508	3.35714	0.442067	94.7286	105.565	293.966	14.5205	3.57143
TP2020080305	Asterothamnus centraliasiaticus	Asteraceae	semi-shrub	deciduous	0.34	0.0113333	0.00366667	0.323529	2.09091	0.4083	111.355	89.8032	408.4	23.7088	1.64163
TP2020080305	Salsola abrotanoides	Amaranthaceae	semi-shrub	perennial	0.714	0.019	0.00566667	0.298246	2.35294	0.287733	50.7765	196.942	264.184	20.6123	1.03954
TP2020080305	Reaumuria soongarica	Tamaricaceae	shrub	deciduous	0.0964	0.0009	0.0003	0.333333	2	0.01689	56.3	177.62	367.56	15.0836	0.794555
TP2020080305	Sympegma regelii	Amaranthaceae	semi-shrub	perennial	0.1284	0.0022449	0.000408163	0.181818	4.5	0.0312449	76.55	130.634	317.318	20.6693	1.61616
TP2020080305	Corethrodendron multijugum	Fabaceae	semi-shrub	perennial	0.344	0.0136667	0.004	0.292683	2.41667	0.380167	95.0417	105.217	413.856	26.0163	1.34823
TP2020080305	Brachanthemum pulvinatum	Asteraceae	semi-shrub	perennial	0.354	0.0048	0.0014	0.291667	2.42857	0.17042	121.729	82.15	509.355	23.1595	1.70071
TP2020080401	Senecio thianschanicus	Asteraceae	herb	perennial	0.458	0.212667	0.0436667	0.205329	3.87023	5.14833	117.901	84.8171	335.329	18.3777	2.10409
TP2020080401	Aster flaccidus	Asteraceae	herb	perennial	0.364	0.0956667	0.0183333	0.191638	4.21818	2.6702	145.647	68.659	339.195	25.0726	2.02261
TP2020080401	Lagotis brachystachya	Plantaginaceae	herb	perennial	0.314	0.123	0.026	0.211382	3.73077	2.8195	108.442	92.2149	415.867	25.059	2.0588
TP2020080401	Saussurea apus	Asteraceae	herb	perennial	0.388	0.0875	0.0225	0.257143	2.88889	2.3831	105.916	94.4148	381.353	24.4932	1.84273
TP2020080401	Microula tibetica	Boraginaceae	herb	perennial	0.444	0.18	0.033	0.183333	4.45455	4.0637	123.142	81.2068	326.764	20.2136	1.6931
TP2020080401	Delphinium qinghaiense	Ranunculaceae	herb	perennial	0.432	0.383	0.071	0.185379	4.39437	10.1038	142.307	70.2706	391.091	27.4774	1.57477
TP2020080402	Lagotis brachystachya	Plantaginaceae	herb	perennial	0.278	0.1085	0.0265	0.24424	3.09434	2.66735	100.655	99.3495	442.071	27.9835	1.80481
TP2020080402	Rhodiola dumulosa	Crassulaceae	herb	perennial	0.608	0.0098	0.0006	0.0612245	15.3333	0.1704	284	35.2113	381.926	21.746	1.4536
TP2020080402	Artemisia aschurbajewii	Asteraceae	herb	perennial	0.24	0.00266667	0.000333333	0.125	7	0.180733	542.2	18.4434	427.018	27.2132	2.41305
TP2020080402	Senecio thianschanicus	Asteraceae	herb	perennial	0.416	0.041	0.00866667	0.211382	3.73077	1.06397	122.765	81.4562	398.65	22.7533	1.82277
TP2020080402	Saussurea apus	Asteraceae	herb	perennial	0.356	0.075	0.02	0.266667	2.75	1.969	98.45	101.574	408.343	21.2018	0.888634
TP2020080402	Thalictrum alpinum	Ranunculaceae	herb	perennial	0.22	0.008	0.00333333	0.416667	1.4	0.516833	155.05	64.4953	100.61	23.6171	1.2441
TP2020080402	Aster flaccidus	Asteraceae	herb	perennial	0.498	0.0656667	0.0116667	0.177665	4.62857	1.52693	130.88	76.4059	371.18	23.9328	1.8917
TP2020080403	Kobresia kansuensis	Cyperaceae	herb	perennial	0.0276667	0.0216667	0.00966667	0.446154	1.24138	1.05663	109.307	91.4855	289.564	18.1749	1.19599
TP2020080403	Oxytropis kansuensis	Fabaceae	herb	perennial	0.238	0.00666667	0.00166667	0.25	3	0.285767	171.46	58.3226	437.287	44.9343	2.25699
TP2020080403	Potentilla saundersiana	Rosaceae	herb	perennial	0.224	0.033	0.012	0.363636	1.75	1.52683	127.236	78.594	391.986	32.1985	2.02938
TP2020080403	Viola biflora var. rockiana	Violaceae	herb	perennial	0.274	0.0536667	0.015	0.279503	2.57778	2.15643	143.762	69.5593	402.124	30.554	1.88624
TP2020080403	Aster flaccidus	Asteraceae	herb	perennial	0.414	0.0493333	0.0113333	0.22973	3.35294	1.4656	129.318	77.329	401.086	23.4606	1.12971
TP2020080404	Nitraria sibirica	Nitrariaceae	shrub	deciduous	0.762	0.0783333	0.0146667	0.187234	4.34091	0.9878	67.35	148.478	359.601	26.5278	2.10765
TP2020080501	Brachanthemum pulvinatum	Asteraceae	semi-shrub	perennial	0.254	0.001	0.000333333	0.333333	2	0.0555	166.5	60.0601	437.983	19.6584	1.38808
TP2020080501	Nitraria sibirica	Nitrariaceae	shrub	deciduous	0.626	0.088	0.0143333	0.162879	5.13953	1.36673	95.3535	104.873	387.554	35.2568	1.49162
TP2020080501	Salsola abrotanoides	Amaranthaceae	semi-shrub	perennial	1.428	0.0264286	0.00464286	0.175676	4.69231	0.3435	73.9846	135.163	270.81	19.7702	1.09895
TP2020080501	Achnatherum pekinense	Poaceae	herb	perennial	0.27	0.014	0.007	0.5	1	0.579533	82.7905	120.787	412.204	23.3608	1.2298
TP2020080502	Brachanthemum pulvinatum	Asteraceae	semi-shrub	perennial	0.276	0.001	0.000333333	0.333333	2	0.0362	108.6	92.081	469.678	19.8214	2.51417
TP2020080502	Nitraria sibirica	Nitrariaceae	shrub	deciduous	0.584	0.0583333	0.0136667	0.234286	3.26829	1.1084	81.1024	123.301	357.51	26.1309	1.61882
TP2020080502	Stipa tianschanica var. gobica	Poaceae	herb	perennial	0.302	0.0193333	0.00933333	0.482759	1.07143	0.588233	63.025	158.667	440.777	23.7972	1.92619
TP2020080502	Krascheninnikovia ceratoides	Amaranthaceae	semi-shrub	perennial	0.27	0.024	0.00733333	0.305556	2.27273	0.831733	113.418	88.1693	379.701	18.5443	1.05743
TP2020080503	Artemisia xerophytica	Asteraceae	shrub	deciduous	0.186	0.0014	0.0002	0.142857	6	0.08766	438.3	22.8154	475.437	34.5279	2.98389
TP2020080503	Reaumuria kaschgarica	Tamaricaceae	semi-shrub	deciduous	0.466	0.0039	0.0011	0.282051	2.54545	0.09381	85.2818	117.258	352.873	25.4183	1.34633
TP2020080503	Reaumuria soongarica	Tamaricaceae	shrub	deciduous	0.226	0.0012	0.0005	0.416667	1.4	0.03445	68.9	145.138	373.129	21.097	1.0416
TP2020080503	Potentilla parvifolia	Rosaceae	shrub	deciduous	0.136	0.0022	0.0012	0.545455	0.833333	0.19648	163.733	61.0749	418.188	24.9371	1.70417
TP2020080503	Salsola abrotanoides	Amaranthaceae	semi-shrub	perennial	1.168	0.0256667	0.005	0.194805	4.13333	0.3545	70.9	141.044	275.247	29.0765	1.35315
TP2020080503	Achnatherum inebrians	Poaceae	herb	perennial	0.722	0.304	0.14	0.460526	1.17143	5.7187	40.8479	244.811	411.592	29.2011	1.53896
TP2020080504	Allium mongolicum	Amaryllidaceae	herb	perennial	1.28	0.259	0.019	0.0733591	12.6316	2.9189	153.626	65.093	358.513	30.5362	2.9358
TP2020080504	Leymus paboanus	Poaceae	herb	perennial	0.828	0.269	0.158	0.587361	0.702532	5.0924	32.2304	310.266	420.611	18.4802	1.23453
TP2020080504	Krascheninnikovia ceratoides	Amaranthaceae	semi-shrub	perennial	0.29	0.0123333	0.005	0.405405	1.46667	0.543933	108.787	91.923	321.333	21.6621	1.34801
TP2020080504	Nitraria roborowskii	Nitrariaceae	shrub	deciduous	0.644	0.095	0.0186667	0.196491	4.08929	1.57547	84.4	118.483	336.788	27.4354	1.45495
TP2020080504	Artemisia xerophytica	Asteraceae	shrub	deciduous	0.218	0.0008	0.0002	0.25	3	0.06352	317.6	31.4861	418.258	25.571	3.15093
TP2020080505	Asterothamnus centraliasiaticus	Asteraceae	semi-shrub	deciduous	0.374	0.00966667	0.002	0.206897	3.83333	0.4338	216.9	46.1042	398.675	24.5338	3.61258
TP2020080505	Reaumuria soongarica	Tamaricaceae	shrub	deciduous	0.296	0.001	0.0003	0.3	2.33333	0.0232	77.3333	129.31	341.275	21.6602	1.01598
TP2020080505	Achnatherum inebrians	Poaceae	herb	perennial	0.852	0.373	0.184	0.493298	1.02717	5.4527	29.6342	337.448	321.517	22.421	1.45223
TP2020080601	Artemisia dalai-lamae	Asteraceae	semi-shrub	perennial	0.234	0.0034	0.001	0.294118	2.4	0.17506	175.06	57.1233	406.291	26.409	2.51933
TP2020080601	Nitraria sibirica	Nitrariaceae	shrub	deciduous	0.878	0.086	0.014	0.162791	5.14286	1.44013	102.867	97.2132	353.721	33.1392	1.66564
TP2020080602	Achnatherum inebrians	Poaceae	herb	perennial	0.45	0.262	0.123	0.469466	1.13008	6.3052	51.2618	195.077	384.407	22.4088	1.34332
TP2020080602	Aster altaicus	Asteraceae	herb	perennial	0.296	0.0136667	0.00366667	0.268293	2.72727	0.641	174.818	57.2023	363.439	25.6777	1.69409
TP2020080602	Artemisia pewzowii	Asteraceae	herb	perennial	0.222	0.00148148	0.00037037	0.25	3	0.0875926	236.5	42.2833	389.153	21.1251	1.39869
TP2020080602	Pedicularis alaschanica	Orobanchaceae	herb	perennial	0.486	0.0555	0.0105	0.189189	4.28571	1.4242	135.638	73.7256	324.251	21.3201	2.15826
TP2020080603	Potentilla parvifolia	Rosaceae	shrub	deciduous	0.3	0.002	0.001	0.5	1	0.14132	141.32	70.7614	397.975	17.1978	1.51946
TP2020080603	Limonium dielsianum	Plumbaginaceae	herb	perennial	0.944	0.655	0.1	0.152672	5.55	11.5351	115.351	86.6919	321.915	34.3495	2.35402
TP2020080603	Artemisia dalai-lamae	Asteraceae	semi-shrub	perennial	0.338	0.0036	0.0008	0.222222	3.5	0.1515	189.375	52.8053	382.448	20.8881	1.79693
TP2020080603	Reaumuria kaschgarica	Tamaricaceae	semi-shrub	deciduous	0.942	0.012	0.00166667	0.138889	6.2	0.284533	170.72	58.5754	345.616	31.7537	1.7178
TP2020080603	Salsola abrotanoides	Amaranthaceae	semi-shrub	perennial	1.578	0.054	0.008	0.148148	5.75	0.517967	64.7458	154.45	240	25.1003	1.48921
TP2020080701	Gentiana straminea	Gentianaceae	herb	perennial	0.4	0.648	0.162	0.25	3	14.6705	90.5586	110.426	411.656	22.308	1.61395
TP2020080701	Potentilla bifurca	Rosaceae	herb	perennial	0.216	0.0072	0.0034	0.472222	1.11765	0.52332	153.918	64.9698	414	20.3769	1.48216
TP2020080701	Artemisia phaeolepis	Asteraceae	herb	perennial	0.302	0.015	0.004	0.266667	2.75	0.620033	155.008	64.5127	418.552	22.8929	1.53279
TP2020080701	Delphinium qinghaiense	Ranunculaceae	herb	perennial	0.348	0.0825	0.017	0.206061	3.85294	3.09065	181.803	55.0046	350.625	28.5903	1.89807
TP2020080701	Astragalus polycladus	Fabaceae	herb	perennial	0.168	0.002	0.0004	0.2	4	0.14279	356.975	28.0132	397.279	48.1326	2.86057
TP2020080702	Lancea tibetica	Mazaceae	herb	perennial	0.334	0.0815	0.02	0.245399	3.075	2.6876	134.38	74.4158	417.097	19.0021	1.29435
TP2020080702	Salix oritrepha	Salicaceae	shrub	deciduous	0.284	0.0813333	0.0343333	0.422131	1.36893	4.12017	120.005	83.33	465.643	32.1293	2.16956
TP2020080702	Astragalus polycladus	Fabaceae	herb	perennial	0.19	0.0017	0.0003	0.176471	4.66667	0.1148	382.667	26.1324	393.621	43.8138	2.2921
TP2020080702	Lagotis brachystachya	Plantaginaceae	herb	perennial	0.322	0.1575	0.039	0.247619	3.03846	3.82645	98.1141	101.922	417.6	22.559	1.8514
TP2020080702	Gentiana straminea	Gentianaceae	herb	perennial	0.132	0.23	0.054	0.234783	3.25926	6.0123	111.339	89.8159	392.658	22.4571	1.52346
TP2020080702	Gentiana dahurica	Gentianaceae	herb	perennial	0.272	0.169	0.045	0.266272	2.75556	4.4425	98.7222	101.294	366.04	20.9414	1.45119
TP2020080702	Kobresia pusilla	Cyperaceae	herb	perennial	0.202	0.0133333	0.007	0.525	0.904762	0.698767	99.8238	100.177	392.824	12.9864	0.816304
TP2020080702	Potentilla potaninii	Rosaceae	herb	perennial	0.148	0.00466667	0.002	0.428571	1.33333	0.317933	158.967	62.9063	402	28.0225	1.88453
TP2020080702	Plantago asiatica	Plantaginaceae	herb	perennial	0.184	0.112	0.027	0.241071	3.14815	5.1263	189.863	52.6696	367.279	22.0832	1.8125
TP2020080702	Stipa tianschanica	Poaceae	herb	perennial	0.212	0.00766667	0.00233333	0.304348	2.28571	0.3523	150.986	66.2314	408.035	16.8034	1.0747
TP2020080702	Carex montis-everesti	Cyperaceae	herb	perennial	0.23	0.0113333	0.00633333	0.558824	0.789474	0.5002	78.9789	126.616	374.172	14.8398	0.983154
TP2021070201	Sympegma regelii	Amaranthaceae	semi-shrub	perennial	0.772	0.00333333	0.001	0.3	2.33333	0.1111	111.1	90.009	330.403	24.1483	1.464
TP2021070201	Zygophyllum mucronatum	Zygophyllaceae	herb	perennial	1.056	0.016	0.0025	0.15625	5.4	0.2541	101.64	98.3865	337.4	23.0665	1.51678
TP2021070201	Brachanthemum pulvinatum	Asteraceae	semi-shrub	perennial	0.582	0.00653846	0.00153846	0.235294	3.25	0.225192	146.375	68.3177	391.034	23.0778	1.3665
TP2021070201	Eragrostis nigra	Poaceae	herb	perennial	0.176	0.039	0.013	0.333333	2	2.2304	171.569	58.2855	402.041	27.7613	1.97742
TP2021070201	Reaumuria soongarica	Tamaricaceae	shrub	deciduous	0.314	0.0006	0.0003	0.5	1	0.111904	373.015	26.8086	278.095	19.1174	0.812072
TP2021070201	Salsola passerina	Amaranthaceae	semi-shrub	perennial	1.824	0.00733333	0.002	0.272727	2.66667	0.113267	56.6333	176.574	273.066	21.4752	1.10923
TP2021070202	Ligularia virgaurea	Asteraceae	herb	perennial	0.488	2.86	0.532	0.186014	4.37594	60.2475	113.247	88.3024	406.552	26.7184	0.939553
TP2021070202	Leontopodium nanum	Asteraceae	herb	perennial	0.182	0.0185	0.005	0.27027	2.7	1.02005	204.01	49.0172	344.262	20.2043	0.728453
TP2021070202	Potentilla bifurca	Rosaceae	herb	perennial	0.246	0.0095	0.0055	0.578947	0.727273	0.523	95.0909	105.163	379.565	24.2081	0.78824
TP2021070202	Stellera chamaejasme	Thymelaeaceae	herb	perennial	0.198	0.0115	0.0035	0.304348	2.28571	0.79415	226.9	44.0723	422.4	27.7335	1.74837
TP2021070202	Aster pekinensis	Asteraceae	herb	perennial	0.212	0.0155	0.0045	0.290323	2.44444	0.7661	170.244	58.7391	300	26.2207	1.15287
TP2021070202	Caragana erinacea	Fabaceae	shrub	deciduous	0.252	0.0015	0.0004	0.266667	2.75	0.09291	232.275	43.0524	371.28	21.9856	0.60999
TP2021070202	Trichophorum distigmaticum	Cyperaceae	herb	perennial	0.182	0.006	0.0035	0.583333	0.714286	0.2309	65.9714	151.581	392.426	37.6431	0.946141
TP2021070203	Plantago depressa	Plantaginaceae	herb	annual	0.374	0.163	0.031	0.190184	4.25806	6.0825	196.21	50.9659	344.015	18.1818	1.40909
TP2021070203	Potentilla anserina	Rosaceae	herb	perennial	0.238	0.006	0.0015	0.25	3	0.4022	268.133	37.2949	393.871	24.783	1.31267
TP2021070203	Leymus secalinus	Poaceae	herb	perennial	0.248	0.131	0.049	0.374046	1.67347	3.4169	69.7327	143.405	403.562	27.8616	0.744506
TP2021070301	Polygonum viviparum	Polygonaceae	herb	perennial	0.23	0.322	0.093	0.28882	2.46237	11.8065	126.952	78.7702	395.166	27.0702	1.91282
TP2021070301	Polygonum macrophyllum	Polygonaceae	herb	perennial	0.166	0.034	0.011	0.323529	2.09091	1.3902	126.382	79.1253	392.481	28.1181	2.29663
TP2021070301	Potentilla anserina	Rosaceae	herb	perennial	0.154	0.015	0.00533333	0.355556	1.8125	0.8728	163.65	61.106	404.39	24.2937	1.05771
TP2021070301	Oxytropis ochrocephala	Fabaceae	herb	perennial	0.214	0.00896552	0.00310345	0.346154	1.88889	0.569897	183.633	54.4563	419.512	34.3742	1.24088
TP2021070301	Ligularia virgaurea	Asteraceae	herb	perennial	0.544	1.338	0.3	0.224215	3.46	28.7074	95.6913	104.503	424.49	20.2507	1.14828
TP2021070301	Saussurea hieracioides	Asteraceae	herb	perennial	0.27	0.1125	0.027	0.24	3.16667	4.20215	155.635	64.2528	417.436	20.8217	1.40892
TP2021070301	Anaphalis hancockii	Asteraceae	herb	perennial	0.242	0.057619	0.0138095	0.239669	3.17241	2.74357	198.672	50.3341	381.02	19.0819	2.17392
TP2021070301	Asteraceae	Asteraceae	herb	perennial	0.474	0.405	0.069	0.17037	4.86957	8.62035	124.933	80.0432	392.308	22.2642	1.41801
TP2021070301	Elymus nutans	Poaceae	herb	perennial	0.194	0.0342857	0.0128571	0.375	1.66667	2.19886	171.022	58.4719	408.824	27.1372	1.27
TP2021070301	Lancea tibetica	Mazaceae	herb	perennial	0.302	0.0835	0.0215	0.257485	2.88372	2.99543	139.322	71.776	411.429	19.1216	1.72311
TP2021070301	Potentilla saundersiana	Rosaceae	herb	perennial	0.348	0.0296667	0.012	0.404494	1.47222	1.29727	108.106	92.5022	388.378	19.917	1.53607
TP2021070302	Trollius farreri	Ranunculaceae	herb	perennial	0.286	0.125333	0.0326667	0.260638	2.83673	4.47053	136.853	73.0711	377.826	15.4831	1.09473
TP2021070302	Anemone coelestina var. linearis	Ranunculaceae	herb	perennial	0.218	0.0915	0.0205	0.224044	3.46341	3.7202	181.473	55.1046	396.767	21.25	1.85603
TP2021070302	Nardostachys jatamansi	Caprifoliaceae	herb	perennial	0.252	0.180667	0.0353333	0.195572	4.11321	4.70973	133.294	75.0219	403.673	16.4893	1.78026
TP2021070302	Ligularia virgaurea	Asteraceae	herb	perennial	0.522	1.974	0.444	0.224924	3.44595	46.686	105.149	95.1035	372.774	19.8909	1.76055
TP2021070302	Potentilla anserina	Rosaceae	herb	perennial	0.158	0.006	0.003	0.5	1	0.444633	148.211	67.4713	372.097	20.7349	1.60968
TP2021070302	Ajuga lupulina	Lamiaceae	herb	perennial	0.434	0.361	0.089	0.246537	3.05618	11.8251	132.866	75.2636	374.754	20.761	1.70058
TP2021070302	Saussurea hieracioides	Asteraceae	herb	perennial	0.262	0.123158	0.0273684	0.222222	3.5	4.56016	166.621	60.0164	385.745	18.7662	1.44115
TP2021070302	Artemisia frigida	Asteraceae	semi-shrub	perennial	0.198	0.00766667	0.00266667	0.347826	1.875	0.536233	201.088	49.7296	403.958	24.2015	2.29601
TP2021070302	Ranunculus membranaceus	Ranunculaceae	herb	perennial	0.318	0.016	0.00466667	0.291667	2.42857	0.842067	180.443	55.4192	348.333	18.1357	1.24523
TP2021070302	Lancea tibetica	Mazaceae	herb	perennial	0.304	0.1115	0.0285	0.255605	2.91228	3.79875	133.289	75.0247	422	14.6165	1.05166
TP2021070401	Stellera chamaejasme	Thymelaeaceae	herb	perennial	0.166	0.012	0.00366667	0.305556	2.27273	0.835	227.727	43.9122	396.394	25.1388	1.42517
TP2021070401	Trollius farreri	Ranunculaceae	herb	perennial	0.232	0.116667	0.0346667	0.297143	2.36538	5.96047	171.937	58.161	342.845	20.6325	1.6749
TP2021070401	Berberis ferdinandi-coburgii	Berberidaceae	shrub	evergreen	0.292	0.198	0.0506667	0.255892	2.90789	8.12873	160.436	62.3303	380.472	27.0448	2.04353
TP2021070401	Potentilla fruticosa	Rosaceae	shrub	deciduous	0.106	0.00125	0.00075	0.6	0.666667	0.128875	171.833	58.1959	382.464	19.9249	1.85989
TP2021070401	Klasea centauroides subsp. Strangulata	Asteraceae	herb	perennial	0.446	1.97	0.386	0.195939	4.10363	61.2682	158.726	63.0017	383.757	29.9427	2.16716
TP2021070401	Sibiraea angustata	Rosaceae	shrub	deciduous	0.194	0.0835	0.034	0.407186	1.45588	4.494	132.176	75.6564	413.742	21.6212	0.853071
TP2021070401	Artemisia gmelinii	Asteraceae	semi-shrub	perennial	0.202	0.00448276	0.00206897	0.461538	1.16667	0.414379	200.283	49.9293	414.793	30.3264	1.30761
TP2021070402	Trollius farreri	Ranunculaceae	herb	perennial	0.266	0.222	0.067	0.301802	2.31343	10.8162	161.436	61.9441	348.6	22.9401	1.54892
TP2021070402	Potentilla anserina	Rosaceae	herb	perennial	0.186	0.0155	0.006	0.387097	1.58333	1.2208	203.467	49.1481	369.598	18.7638	1.65356
TP2021070402	Salvia roborowskii	Lamiaceae	herb	perennial	0.286	0.306	0.094	0.30719	2.25532	13.2738	141.211	70.8162	353.897	22.5393	1.3205
TP2021070402	Geranium pylzowianum	Geraniaceae	herb	perennial	0.164	0.087	0.036	0.413793	1.41667	4.8024	133.4	74.9625	371.01	22.5	3.65182
TP2021070402	Aconitum gymnandrum	Ranunculaceae	herb	annual	0.292	0.0325	0.0085	0.261538	2.82353	1.548	182.118	54.9096	326.619	24.1686	4.12684
TP2021070403	Clematis fruticosa	Ranunculaceae	shrub	deciduous	0.316	0.0035	0.0016	0.457143	1.1875	0.15685	98.0312	102.008	368.455	15.6941	0.296997
TP2021070403	Iris lactea	Iridaceae	herb	perennial	0.244	0.0123333	0.00566667	0.459459	1.17647	0.5556	98.0471	101.992	414.676	19.6131	0.738868
TP2021070403	Aster poliothamnus	Asteraceae	shrub	deciduous	0.19	0.004	0.00266667	0.666667	0.5	0.325567	122.088	81.9085	406.169	21.2864	0.991286
TP2021070403	Artemisia gmelinii var. messerschmidiana	Asteraceae	herb	perennial	0.322	0.013	0.00566667	0.435897	1.29412	0.5024	88.6588	112.792	395.471	15.487	0.5884
TP2021070403	Artemisia gmelinii var. messerschmidiana	Asteraceae	herb	perennial	0.248	0.00433333	0.00266667	0.615385	0.625	0.566067	212.275	47.1087	435.311	22.4594	1.21131
TP2021070404	Daphne rosmarinifolia	Thymelaeaceae	shrub	evergreen	0.426	0.068	0.0203333	0.29902	2.34426	2.09683	103.123	96.9716	416.09	23.3879	2.12002
TP2021070404	Potentilla fruticosa	Rosaceae	shrub	deciduous	0.132	0.002	0.0012	0.6	0.666667	0.18641	155.342	64.3742	383.691	20.0783	1.68086
TP2021070404	Salix oritrepha	Salicaceae	shrub	deciduous	0.154	0.0595	0.0255	0.428571	1.33333	3.38685	132.818	75.2912	424.397	22.0937	1.95204
TP2021070404	Spiraea alpina	Rosaceae	shrub	deciduous	0.126	0.00933333	0.005	0.535714	0.866667	0.6731	134.62	74.2832	409.356	20.2852	1.01808
TP2021070404	Rhododendron nivale	Ericaceae	shrub	evergreen	0.316	0.0466667	0.0243333	0.521429	0.917808	1.7356	71.326	140.201	404.941	15.3156	0.499839
TP2021070404	Potentilla fruticosa	Rosaceae	shrub	deciduous	0.126	0.00225	0.0015	0.666667	0.5	0.27675	184.5	54.2005	364.484	21.4359	1.79941
TP2021070501	Potentilla fruticosa	Rosaceae	shrub	deciduous	0.16	0.0022	0.0012	0.545455	0.833333	0.21276	177.3	56.4016	329.636	23.4576	1.88856
TP2021070501	Lonicera rupicola	Caprifoliaceae	shrub	deciduous	0.15	0.0223333	0.00933333	0.41791	1.39286	1.29287	138.521	72.191	436.027	27.3288	2.26109
TP2021070501	Berberis ferdinandi-coburgii	Berberidaceae	shrub	evergreen	0.274	0.115	0.048	0.417391	1.39583	5.07835	105.799	94.5189	371.496	21.8769	1.49039
TP2021070501	Salix oritrepha	Salicaceae	shrub	deciduous	0.13	0.0775	0.0285	0.367742	1.7193	5.0117	175.849	56.8669	385.994	26.2541	2.13354
TP2021070501	Lonicera hispida	Caprifoliaceae	shrub	deciduous	0.272	0.1405	0.0455	0.323843	2.08791	6.2623	137.633	72.657	382.822	25.0523	1.55347
TP2021070501	Spiraea alpina	Rosaceae	shrub	deciduous	0.132	0.009	0.004	0.444444	1.25	0.541467	135.367	73.8734	392.216	26.9996	1.77237
TP2021070501	Spiraea alpina	Rosaceae	shrub	deciduous	0.14	0.0263333	0.0103333	0.392405	1.54839	2.08747	202.013	49.5018	415.919	27.0541	2.28854
TP2021070501	Hippophae rhamnoides	Elaeagnaceae	shrub	deciduous	0.202	0.0555	0.0205	0.369369	1.70732	2.58155	125.929	79.4097	360.098	32.6776	2.31504
TP2021070501	Potentilla glabra	Rosaceae	shrub	deciduous	0.128	0.0123333	0.00533333	0.432432	1.3125	1.04587	196.1	50.9944	339.803	20.4448	2.51226
TP2021070502	Caragana korshinskii	Fabaceae	shrub	deciduous	0.206	0.00575	0.0025	0.434783	1.3	0.313725	125.49	79.6876	381.979	28.5575	0.822407
TP2021070502	Caragana tibetica	Fabaceae	shrub	deciduous	0.242	0.0017	0.0011	0.647059	0.545455	0.10727	97.5182	102.545	381.315	29.444	0.951291
TP2021070502	Reaumuria soongarica	Tamaricaceae	shrub	deciduous	0.468	0.0008	0.0004	0.5	1	0.0859	214.75	46.5658	286.509	17.3172	0.55791
TP2021070503	Reaumuria soongarica	Tamaricaceae	shrub	deciduous	0.628	0.0014	0.0006	0.428571	1.33333	0.13595	226.583	44.1339	289.133	19.9737	0.416839
TP2021070503	Artemisia brachyloba	Asteraceae	semi-shrub	perennial	0.23	0.0028	0.001	0.357143	1.8	0.2434	243.4	41.0846	357.714	35.8591	2.09882
TP2021070503	Nitraria sibirica	Nitrariaceae	shrub	deciduous	0.482	0.0266667	0.006	0.225	3.44444	0.688967	114.828	87.0869	362.166	33.0183	1.25164
TP2021070503	Achnatherum splendens	Poaceae	herb	perennial	0.334	0.162	0.068	0.419753	1.38235	3.4786	51.1559	195.481	375.383	18.2921	1.29015
TP2021070503	/	/	/	/	0.332	0.48	0.188	0.391667	1.55319	6.8846	36.6202	273.073	407.178	17.5477	0.789199
TP2021070503	Achnatherum splendens	Poaceae	herb	perennial	0.506	0.334	0.152	0.45509	1.19737	5.4892	36.1132	276.907	396.084	21.3071	0.949924
TP2021070601	Berberis amurensis	Berberidaceae	shrub	deciduous	0.23	0.274	0.122	0.445255	1.2459	2.06645	16.9381	590.385	421.223	15.9258	0.644558
TP2021070601	Potentilla saundersiana	Rosaceae	herb	perennial	0.214	0.0156667	0.008	0.510638	0.958333	0.890267	111.283	89.8607	381.861	15.0073	0.801337
TP2021070601	Artemisia frigida	Asteraceae	semi-shrub	perennial	0.21	0.0042	0.0014	0.333333	2	0.3579	255.643	39.1171	410.525	19.0506	1.01273
TP2021070601	Potentilla parvifolia	Rosaceae	shrub	deciduous	0.196	0.0012	0.0007	0.583333	0.714286	0.0782	111.714	89.5141	376.307	14.4429	0.877544
TP2021070601	Artemisia argyrophylla	Asteraceae	semi-shrub	perennial	0.296	0.0046	0.0022	0.478261	1.09091	0.5527	251.227	39.8046	439.477	21.4208	1.42407
TP2021070601	Stellera chamaejasme	Thymelaeaceae	herb	perennial	0.19	0.023	0.00666667	0.289855	2.45	1.2477	187.155	53.4316	415.587	31.1792	1.42049
TP2021070601	Thermopsis lanceolata	Fabaceae	herb	perennial	0.26	0.1075	0.0315	0.293023	2.4127	4.23405	134.414	74.3969	474.729	32.2632	0.947363
TP2021070601	Carduus acanthoides	Asteraceae	herb	perennial	0.258	1.566	0.466	0.297573	2.36052	29.3622	63.009	158.707	369.006	15.9105	0.462203
TP2021070602	Astragalus	Fabaceae	herb	perennial	0.276	0.005	0.002	0.4	1.5	0.301975	150.987	66.2306	361.469	29.7944	1.35113
TP2021070602	Artemisia stechmanniana	Asteraceae	semi-shrub	perennial	0.208	0.012	0.005	0.416667	1.4	0.588267	117.653	84.9955	422.774	28.1322	1.88746
TP2021070602	Achnatherum splendens	Poaceae	herb	perennial	0.388	0.68	0.264	0.388235	1.57576	15.1152	57.2545	174.659	365.47	26.0538	0.996011
TP2021070602	Achnatherum splendens	Poaceae	herb	perennial	0.204	0.264	0.114	0.431818	1.31579	4.2748	37.4982	266.679	377.65	23.3224	1.06118
TP2021070603	Sibiraea angustata	Rosaceae	shrub	deciduous	0.18	0.0705	0.031	0.439716	1.27419	4.1873	135.074	74.0334	446.431	24.8376	1.32066
TP2021070603	Caragana brevifolia	Fabaceae	shrub	deciduous	0.142	0.0012	0.0003	0.25	3	0.18335	611.167	16.3621	412.771	31.8037	1.68616
TP2021070603	Salix oritrepha	Salicaceae	shrub	deciduous	0.17	0.082	0.034	0.414634	1.41176	4.57465	134.549	74.3226	445.71	30.7435	1.74015
TP2021070603	Salix oritrepha	Salicaceae	shrub	deciduous	0.172	0.0463333	0.0203333	0.438849	1.27869	2.5124	123.561	80.9319	431.019	27.795	1.93197
TP2021070603	Potentilla parvifolia	Rosaceae	shrub	deciduous	0.136	0.0026	0.001	0.384615	1.6	0.33715	337.15	29.6604	415.874	22.719	1.3584
TP2021070603	Spiraea alpina	Rosaceae	shrub	deciduous	0.174	0.00666667	0.00333333	0.5	1	1.0615	318.45	31.4021	466.367	23.4688	1.2253
TP2021070603	Berberis amurensis	Berberidaceae	shrub	deciduous	0.234	0.148	0.0615	0.415541	1.4065	6.4091	104.213	95.9573	414.816	24.2081	0.748294
TP2021070603	Lonicera rupicola	Caprifoliaceae	shrub	deciduous	0.122	0.015	0.00666667	0.444444	1.25	0.9322	139.83	71.5154	465.789	27.3376	0.816737
TP2021070701	Potentilla fruticosa	Rosaceae	shrub	deciduous	0.142	0.00125	0.001	0.8	0.25	0.1217	121.7	82.1693	394.309	25.6053	1.56428
TP2021070701	Rheum pumilum	Polygonaceae	herb	perennial	0.464	0.255	0.044	0.172549	4.79545	4.9958	113.541	88.074	322.544	18.7023	1.49202
TP2021070701	Sibbaldia procumbens var. aphanopetala	Rosaceae	herb	perennial	0.164	0.015	0.006	0.4	1.5	0.896867	149.478	66.8996	400.158	22.2345	1.26716
TP2021070701	Polygonum viviparum	Polygonaceae	herb	perennial	0.188	0.217	0.052	0.239631	3.17308	9.1239	175.46	56.9932	420.223	32.3418	1.93428
TP2021070701	Pleurospermum pulszkyi	Apiaceae	herb	perennial	0.178	0.00766667	0.00233333	0.304348	2.28571	0.420333	180.143	55.5115	407.708	34.2546	2.12836
TP2021070701	Meconopsis quintuplinervia	Papaveraceae	herb	perennial	0.226	0.286	0.044	0.153846	5.5	11.561	262.75	38.059	383.268	31.7716	2.09625
TP2021070702	Astragalus mahoschanicus	Fabaceae	herb	perennial	0.176	0.008	0.00166667	0.208333	3.8	0.444067	266.44	37.5319	405.01	35.7272	2.22197
TP2021070702	Lancea tibetica	Mazaceae	herb	perennial	0.272	0.0845	0.0215	0.254438	2.93023	3.2189	149.716	66.793	457.352	22.9579	1.89933
TP2021070702	Polygonum viviparum var. tenuifolium	Polygonaceae	herb	perennial	0.16	0.232	0.06	0.258621	2.86667	8.3208	138.68	72.1085	400.731	29.5687	2.96562
TP2021070702	Potentilla fruticosa	Rosaceae	shrub	deciduous	0.148	0.0015	0.00075	0.5	1	0.151075	201.433	49.6442	437.22	22.0451	2.07506
TP2021070702	Anaphalis hancockii	Asteraceae	herb	perennial	0.148	0.052	0.0115	0.221154	3.52174	2.9209	253.991	39.3714	405.67	18.8336	1.8462
TP2021070703	Potentilla bifurca	Rosaceae	herb	perennial	0.196	0.00633333	0.00333333	0.526316	0.9	0.4091	122.73	81.4797	424.296	25.1182	1.82325
TP2021070703	Elymus dahuricus	Poaceae	herb	perennial	0.198	0.14	0.052	0.371429	1.69231	3.7127	71.3981	140.06	378.19	25.3302	1.53884
TP2021070703	Medicago ruthenica	Fabaceae	herb	perennial	0.144	0.008	0.00333333	0.416667	1.4	0.6655	199.65	50.0877	367.133	35.6629	2.29144
TP2021070703	Potentilla saundersiana	Rosaceae	herb	perennial	0.212	0.016	0.00633333	0.395833	1.52632	0.7687	121.374	82.3902	348.334	27.4755	1.91579
TP2021070801	Stellera chamaejasme	Thymelaeaceae	herb	perennial	0.176	0.0173333	0.00533333	0.307692	2.25	1.04227	195.425	51.1705	402.854	31.1949	2.22978
TP2021070801	Stipa bungeana	Poaceae	herb	perennial	0.25	0.019	0.009	0.473684	1.11111	1.3645	151.611	65.9582	369.218	14.991	0.796636
TP2021070801	Artemisia frigida	Asteraceae	semi-shrub	perennial	0.074	0.001	0.000666667	0.666667	0.5	0.1375	206.25	48.4848	406.538	26.9941	1.88915
TP2021070801	Leymus secalinus	Poaceae	herb	perennial	0.248	0.112	0.053	0.473214	1.11321	2.3796	44.8981	222.727	329.751	14.2812	1.16237
TP2021070802	Anaphalis flavescens	Asteraceae	herb	perennial	0.296	0.101	0.0215	0.212871	3.69767	3.86595	179.812	55.6138	385.969	23.4812	1.79966
TP2021070802	Gentiana straminea	Gentianaceae	herb	perennial	0.322	0.554	0.13	0.234657	3.26154	15.9876	122.982	81.313	389.383	23.3968	2.07579
TP2021070802	Phyllolobium tribulifolium	Fabaceae	semi-shrub	perennial	0.214	0.0153333	0.00333333	0.217391	3.6	0.7571	227.13	44.0276	347.425	35.1229	1.31977
TP2021070802	Saussurea arenaria	Asteraceae	herb	perennial	0.278	0.292	0.055	0.188356	4.30909	6.8312	124.204	80.5129	375.094	25.8365	1.83954
TP2021070802	Kobresia pygmaea	Cyperaceae	herb	perennial	0.192	0.006	0.00266667	0.444444	1.25	0.354333	132.875	75.2587	379.991	19.3995	1.12823
TP2021070802	Stellera chamaejasme	Thymelaeaceae	herb	perennial	0.154	0.015	0.005	0.333333	2	1.2634	252.68	39.5757	397.42	31.2158	2.73133
TP2021070802	Potentilla saundersiana	Rosaceae	herb	perennial	0.188	0.0293333	0.012	0.409091	1.44444	1.33653	111.378	89.7845	378.764	25.0906	1.74974
TP2021070802	Lancea tibetica	Mazaceae	herb	perennial	0.264	0.093	0.024	0.258065	2.875	3.09965	129.152	77.4281	414.598	18.4422	1.54893
TP2021070803	Astragalus mahoschanicus	Fabaceae	herb	perennial	0.24	0.00933333	0.00266667	0.285714	2.5	0.477267	178.975	55.8737	390.832	48.9628	3.20709
TP2021070803	Astragalus yunnanensis	Fabaceae	herb	perennial	0.198	0.0123333	0.00333333	0.27027	2.7	0.60371	181.113	55.2142	397.399	52.3493	3.82794
TP2021070803	Lamiophlomis rotata	Lamiaceae	herb	perennial	0.428	2.934	0.584	0.199046	4.02397	43.0494	73.7147	135.658	350.131	26.9983	3.0425
TP2021070803	Artemisia frigida	Asteraceae	semi-shrub	perennial	0.182	0.002	0.001	0.5	1	0.281667	281.667	35.503	403.675	33.2441	2.51399
TP2021070803	Lancea tibetica	Mazaceae	herb	perennial	0.29	0.073	0.0165	0.226027	3.42424	2.45557	148.823	67.1941	409.876	23.2449	1.85344
TP2021070803	Ranunculus amurensis	Ranunculaceae	herb	perennial	0.27	0.0483333	0.0106667	0.22069	3.53125	1.8124	169.912	58.8538	402.353	28.3153	2.3286
TP2021070803	Saussurea hieracioides	Asteraceae	herb	perennial	0.348	0.26	0.052	0.2	4	5.4243	104.313	95.8649	387.982	21.686	1.98563
TP2021070803	Phyllolobium tribulifolium	Fabaceae	semi-shrub	perennial	0.188	0.00666667	0.002	0.3	2.33333	0.3934	196.7	50.8388	372.893	37.0568	2.32118
TP2021070803	Gentiana straminea	Gentianaceae	herb	perennial	0.312	0.467	0.116	0.248394	3.02586	12.6311	108.889	91.8368	389.499	27.7698	1.94663
TP2021070803	Kobresia pygmaea	Cyperaceae	herb	perennial	0.132	0.007	0.003	0.428571	1.33333	0.6795	226.5	44.1501	356.628	24.1056	2.17904
TP2021070803	Potentilla bifurca	Rosaceae	herb	perennial	0.144	0.002	0.00166667	0.833333	0.2	0.2351	141.06	70.8918	369.222	21.2424	1.54557
TP2021070803	Thermopsis lanceolata	Fabaceae	herb	perennial	0.214	0.033	0.01	0.30303	2.3	1.4735	147.35	67.8656	398.849	44.7335	2.38343
TP2021070901	Anemone obtusiloba	Ranunculaceae	herb	perennial	0.238	0.036	0.0105	0.291667	2.42857	1.68665	160.633	62.2536	369.84	23.8754	1.82457
TP2021070901	Saussurea hieracioides	Asteraceae	herb	perennial	0.366	0.4935	0.0945	0.191489	4.22222	10.2984	108.978	91.7614	384.51	20.9222	1.70109
TP2021070901	Potentilla saundersiana	Rosaceae	herb	perennial	0.178	0.0206667	0.00733333	0.354839	1.81818	1.18733	161.909	61.7631	373.031	27.9462	2.14353
TP2021070901	Polygonum viviparum	Polygonaceae	herb	perennial	0.196	0.284	0.068	0.239437	3.17647	9.5759	140.822	71.0116	367.04	32.7097	2.78839
TP2021070901	Potentilla anserina	Rosaceae	herb	perennial	0.16	0.00833333	0.00366667	0.44	1.27273	0.5784	157.745	63.3933	390.416	22.6673	1.87595
TP2021070901	Ranunculus brotherusii	Ranunculaceae	herb	perennial	0.154	0.00166667	0.001	0.6	0.666667	0.141667	141.667	70.5882	376.287	17.5	0.833825
TP2021070901	Potentilla fruticosa	Rosaceae	shrub	deciduous	0.114	0.00125	0.0005	0.4	1.5	0.1399	279.8	35.7398	396.8	23.1473	1.36302
TP2021070901	Polygonum macrophyllum	Polygonaceae	herb	perennial	0.128	0.0315	0.008	0.253968	2.9375	1.00695	125.869	79.4478	368.566	28.1696	1.63788
TP2021070901	Saussurea bella	Asteraceae	herb	perennial	0.338	0.3025	0.0605	0.2	4	7.7677	128.392	77.8866	343.073	20.8478	1.11991
TP2021070901	Taraxacum dissectum	Asteraceae	herb	perennial	0.15	0.1135	0.023	0.202643	3.93478	6.8822	299.226	33.4195	352.987	27.7083	3.40786
TP2021070901	Phyllolobium tribulifolium	Fabaceae	semi-shrub	perennial	0.162	0.00766667	0.00166667	0.217391	3.6	0.4856	291.36	34.3218	378.344	37.0312	1.94416
TP2021070902	Stellera chamaejasme	Thymelaeaceae	herb	perennial	0.152	0.008	0.00366667	0.458333	1.18182	0.653533	178.236	56.1053	419.297	29.8625	1.72615
TP2021070902	Thermopsis lanceolata	Fabaceae	herb	perennial	0.206	0.0455	0.0155	0.340659	1.93548	1.5743	101.568	98.4565	435	40.2053	1.76657
TP2021070902	Kobresia royleana	Cyperaceae	herb	perennial	0.224	0.009	0.005	0.555556	0.8	0.280344	56.0688	178.352	378.96	17.0501	0.366043
TP2021070903	Aster altaicus	Asteraceae	herb	perennial	0.142	0.00533333	0.002	0.375	1.66667	0.382533	191.267	52.283	395.575	24.389	1.08292
TP2021070903	Carex microglochin	Cyperaceae	herb	perennial	0.276	0.00766667	0.00466667	0.608696	0.642857	0.3212	68.8286	145.289	376.2	13.4356	0.276199
TP2021070903	Kobresia royleana	Cyperaceae	herb	perennial	0.134	0.00733333	0.00366667	0.5	1	0.203933	55.6182	179.797	394.79	16.4202	0.683393
TP2021070903	Achnatherum splendens	Poaceae	herb	perennial	0.488	0.174	0.079	0.454023	1.20253	4.4756	56.6532	176.513	392.842	15.7652	0.536693
TP2021070903	Bupleurum condensatum	Apiaceae	herb	perennial	0.194	0.0113333	0.00433333	0.382353	1.61538	0.5375	124.038	80.6202	435.938	15.6471	0.907854
TP2021071001	Potentilla bifurca	Rosaceae	herb	perennial	0.116	0.009	0.00333333	0.37037	1.7	0.537433	161.23	62.0232	387.327	22.2421	1.84011
TP2021071001	Poa annua	Poaceae	herb	annual	0.126	0.00633333	0.00333333	0.526316	0.9	0.840667	252.2	39.6511	410.899	18.1763	0.772076
TP2021071001	Saussurea arenaria	Asteraceae	herb	perennial	0.138	0.095	0.0225	0.236842	3.22222	3.50105	155.602	64.2664	383.939	28.4581	1.57042
TP2021071001	Leontopodium nanum	Asteraceae	herb	perennial	0.108	0.0123333	0.00266667	0.216216	3.625	0.781733	293.15	34.1122	411.522	23.9609	1.4406
TP2021071001	Astragalus polycladus	Fabaceae	herb	perennial	0.102	0.0016	0.0006	0.375	1.66667	0.11486	191.433	52.2375	389.73	36.1217	2.11658
TP2021071001	Kobresia tibetica	Cyperaceae	herb	perennial	0.122	0.00366667	0.00166667	0.454545	1.2	0.3605	216.3	46.2321	409.891	16.9628	0.499209
TP2021071002	Artemisia frigida	Asteraceae	semi-shrub	perennial	0.056	0.00166667	0.000666667	0.4	1.5	0.2606	390.9	25.582	446.932	23.5413	1.09846
TP2021071002	Oxytropis microphylla	Fabaceae	herb	perennial	0.136	0.003	0.00075	0.25	3	0.1483	197.733	50.5732	448.71	37.0837	0.949511
TP2021071002	Callianthemum alatavicum	Ranunculaceae	herb	perennial	0.232	0.0246667	0.00666667	0.27027	2.7	0.805	120.75	82.8157	410.092	21.3058	1.42512
TP2021071003	Oxytropis qinghaiensis	Fabaceae	herb	perennial	0.148	0.00333333	0.00133333	0.4	1.5	0.206467	154.85	64.5786	418.71	33.2266	1.75476
TP2021071003	Potentilla fruticosa	Rosaceae	shrub	deciduous	0.094	0.00125	0.00075	0.6	0.666667	0.098525	131.367	76.1228	393.587	20.1459	2.16592
TP2021071003	Potentilla bifurca	Rosaceae	herb	perennial	0.128	0.00428571	0.00214286	0.5	1	0.351429	164	60.9756	390.294	26.8951	2.35343
TP2021071003	Androsace tapete	Primulaceae	herb	perennial	0.1	0.00075	0.00025	0.333333	2	0.03885	155.4	64.3501	385.895	16.2558	1.10911
TP2021071003	Artemisia frigida	Asteraceae	semi-shrub	perennial	0.076	0.00266667	0.001	0.375	1.66667	0.3353	335.3	29.824	408.119	30.3425	4.04216
TP2021071003	Aster asteroides	Asteraceae	herb	perennial	0.344	0.0683333	0.016	0.234146	3.27083	1.83773	114.858	87.0638	372.727	25.0044	2.60042
TP2021071004	Achnatherum splendens	Poaceae	herb	perennial	0.204	0.139	0.051	0.366906	1.72549	4.4772	87.7882	113.91	370.206	26.0336	0.745151
TP2021071004	Poa annua	Poaceae	herb	annual	0.186	0.011	0.00566667	0.515152	0.941176	0.747167	131.853	75.8421	417.857	21.5888	0.463902
TP2021071004	Thermopsis lanceolata	Fabaceae	herb	perennial	0.136	0.029	0.0095	0.327586	2.05263	1.2916	135.958	73.5522	444.545	39.6111	2.2643
TP2021071004	Iris tigridia	Iridaceae	herb	perennial	0.334	0.25	0.097	0.388	1.57732	5.1374	52.9629	188.811	362.727	21.9541	1.01529
TP2021071004	Neotorularia humilis	Brassicaceae	herb	perennial	0.336	0.00666667	0.00233333	0.35	1.85714	0.3203	137.271	72.8484	360.278	31.4087	0.825614
TP2021071101	Polygonum viviparum	Polygonaceae	herb	perennial	0.162	0.254	0.062	0.244094	3.09677	9.3173	150.279	66.5429	397.5	26.001	1.47943
TP2021071101	Corydalis dasyptera	Papaveraceae	herb	perennial	0.224	0.014	0.002	0.142857	6	0.509133	254.567	39.2824	374.848	31.2618	1.22097
TP2021071101	Potentilla fruticosa	Rosaceae	shrub	deciduous	0.162	0.0015	0.0005	0.333333	2	0.10015	200.3	49.9251	405.938	20.2312	1.25419
TP2021071101	Helictotrichon tibeticum	Poaceae	herb	perennial	0.12	0.017	0.006	0.352941	1.83333	0.531105	88.5175	112.972	387.327	20.0422	0.814347
TP2021071101	Polygonum macrophyllum	Polygonaceae	herb	perennial	0.174	0.037	0.011	0.297297	2.36364	1.51057	137.324	72.8204	380.198	29.8393	1.55405
TP2021071102	Corethrodendron multijugum	Fabaceae	semi-shrub	perennial	0.262	0.0266667	0.008	0.3	2.33333	1.1451	143.137	69.8629	386.1	30.9742	1.63602
TP2021071102	Achnatherum splendens	Poaceae	herb	perennial	0.352	0.448	0.188	0.419643	1.38298	20.63	109.734	91.1294	395.429	24.7569	1.9609
TP2021071102	Askellia flexuosa	Asteraceae	herb	perennial	0.314	0.1135	0.014	0.123348	7.10714	3.163	225.929	44.2618	394.444	28.1873	1.95332
TP2021071103	Achnatherum splendens	Poaceae	herb	perennial	0.254	0.181111	0.0833333	0.460123	1.17333	6.817	81.804	122.243	367.113	21.4633	1.40804
TP2021071103	Reaumuria soongarica	Tamaricaceae	shrub	deciduous	0.266	0.001	0.0005	0.5	1	0.02789	55.78	179.276	379.911	26.4306	1.24959
TP2021071201	Reaumuria soongarica	Tamaricaceae	shrub	deciduous	0.322	0.0014	0.0007	0.5	1	0.03644	52.0571	192.097	340.358	19.7672	0.612863
TP2021071201	Artemisia blepharolepis	Asteraceae	herb	annual	0.294	0.003	0.001	0.333333	2	0.0937667	93.7667	106.648	499.936	18.608	1.98088
TP2021071201	Lycium ruthenicum	Solanaceae	shrub	deciduous	0.66	0.0203333	0.00533333	0.262295	2.8125	0.389833	73.0938	136.811	392.871	15.9257	0.606696
TP2021071201	Salsola passerina	Amaranthaceae	semi-shrub	perennial	1.64	0.0051	0.0035	0.686275	0.457143	0.04392	12.5486	796.903	281.05	8.81639	0.634563
TP2021071202	Arnebia fimbriata	Boraginaceae	herb	perennial	0.444	0.00333333	0.001	0.3	2.33333	0.085	85	117.647	361.922	19.6657	1.20052
TP2021071202	Reaumuria soongarica	Tamaricaceae	shrub	deciduous	0.408	0.0007	0.0004	0.571429	0.75	0.02117	52.925	188.947	354.376	21.7127	0.975573
TP2021071202	Zygophyllum xanthoxylon	Zygophyllaceae	shrub	deciduous	0.634	0.0106667	0.00233333	0.21875	3.57143	0.2835	121.5	82.3045	310.074	19.1312	0.520622
TP2021071202	Gymnocarpos przewalskii	Caryophyllaceae	shrub	deciduous	0.716	0.00766667	0.00266667	0.347826	1.875	0.170033	63.7625	156.832	382.331	19.8396	0.765455
TP2021071203	Stipa bungeana	Poaceae	herb	perennial	0.308	0.0113333	0.007	0.617647	0.619048	0.532267	76.0381	131.513	441.677	17.9261	1.10153
TP2021071203	Elymus dahuricus	Poaceae	herb	perennial	0.094	0.00766667	0.00433333	0.565217	0.769231	0.578267	133.446	74.9366	410.857	32.1678	2.1209
TP2021071203	Salsola laricifolia	Amaranthaceae	shrub	deciduous	1.67	0.0326667	0.006	0.183673	4.44444	0.4044	67.4	148.368	269.46	23.1912	0.899273
TP2021071203	Allium mongolicum	Amaryllidaceae	herb	perennial	0.906	0.0513333	0.0106667	0.207792	3.8125	0.805417	75.5078	132.437	421.378	30.7692	2.40924
TP2021071203	Asterothamnus centraliasiaticus	Asteraceae	semi-shrub	deciduous	0.306	0.007	0.00233333	0.333333	2	0.3024	129.6	77.1605	425.259	22.3375	1.26271
TP2021071203	Salsola passerina	Amaranthaceae	semi-shrub	perennial	1.57	0.0069	0.0022	0.318841	2.13636	0.1377	62.5909	159.768	307.669	18.1555	0.72852
TP2021071204	Reaumuria soongarica	Tamaricaceae	shrub	deciduous	0.38	0.001	0.0006	0.6	0.666667	0.02436	40.6	246.305	385.374	24.0175	0.690031
TP2021071204	Sympegma regelii	Amaranthaceae	semi-shrub	perennial	0.628	0.00566667	0.00133333	0.235294	3.25	0.181267	135.95	73.5565	340.921	40.1227	1.36546
TP2021071204	Salsola passerina	Amaranthaceae	semi-shrub	perennial	1.322	0.0027	0.0008	0.296296	2.375	0.06486	81.075	123.343	264.924	33.7991	0.533714
TP2021071401	Atraphaxis pungens	Polygonaceae	shrub	deciduous	0.298	0.032	0.0106667	0.333333	2	0.9514	89.1938	112.115	373.845	19.4377	0.810217
TP2021071401	Nitraria sphaerocarpa	Nitrariaceae	shrub	deciduous	0.74	0.0158065	0.00516129	0.326531	2.0625	0.260355	50.4437	198.241	373.743	25.4082	0.355185
TP2021071401	Salsola laricifolia	Amaranthaceae	shrub	deciduous	1.322	0.0173333	0.004	0.230769	3.33333	0.264633	66.1583	151.153	308.163	25.3039	0.946576
TP2021071402	Potentilla parvifolia var. hypoleuca	Rosaceae	shrub	deciduous	0.33	0.002	0.0015	0.75	0.333333	0.058675	39.1167	255.646	438.084	17.4158	1.06887
TP2021071402	Salsola laricifolia	Amaranthaceae	shrub	deciduous	1.37	0.0176667	0.00366667	0.207547	3.81818	0.288767	78.7545	126.977	313.683	26.7416	0.880595
TP2021071402	Atraphaxis pungens	Polygonaceae	shrub	deciduous	0.31	0.0736667	0.023	0.312217	2.2029	2.13007	92.6116	107.978	421.175	22.1469	0.953213
TP2021071402	Stevenia canescens	Brassicaceae	herb	perennial	0.424	0.00666667	0.002	0.3	2.33333	0.235567	117.783	84.9017	365.085	27.451	1.33977
TP2021071402	Artemisia xerophytica	Asteraceae	shrub	deciduous	0.15	0.00266667	0.00133333	0.5	1	0.1949	146.175	68.4112	436.071	24.0885	2.09229
TP2021071403	Stipa bungeana	Poaceae	herb	perennial	0.314	0.0283333	0.016	0.564706	0.770833	0.7724	48.275	207.147	427.757	20.4494	0.581935
TP2021071403	Corethrodendron multijugum	Fabaceae	semi-shrub	perennial	0.318	0.0193333	0.00666667	0.344828	1.9	0.603167	90.475	110.528	414.535	34.4257	1.43723
TP2021071403	Potentilla parvifolia var. hypoleuca	Rosaceae	shrub	deciduous	0.132	0.002	0.0015	0.75	0.333333	0.11665	77.7667	128.59	434.13	18.2155	1.07804
TP2021071403	Krascheninnikovia ceratoides	Amaranthaceae	semi-shrub	perennial	0.246	0.00833333	0.00366667	0.44	1.27273	0.375133	102.309	97.743	384.986	22.9508	1.26819
TP2021071404	Salsola laricifolia	Amaranthaceae	shrub	deciduous	1.348	0.0235714	0.00464286	0.19697	4.07692	0.329821	71.0385	140.769	283.743	26.2946	0.553089
TP2021071404	Reaumuria soongarica	Tamaricaceae	shrub	deciduous	0.3	0.0011	0.0005	0.454545	1.2	0.02809	56.18	177.999	357.101	26.364	0.833644
TP2021071404	Kalidium cuspidatum var. sinicum	Amaranthaceae	shrub	deciduous	1.262	0.006	0.0015	0.25	3	0.10795	71.9667	138.953	261.066	21.5993	0.615222
TP2021071501	Corethrodendron multijugum	Fabaceae	semi-shrub	perennial	0.264	0.0103333	0.00366667	0.354839	1.81818	0.347133	94.6727	105.627	433.05	23.9815	0.695204
TP2021071501	Reaumuria soongarica	Tamaricaceae	shrub	deciduous	0.25	0.0002	0.0001	0.5	1	0.01127	112.7	88.7311	364.27	17.2577	0.569302
TP2021071501	Zygophyllum xanthoxylon	Zygophyllaceae	shrub	deciduous	1.052	0.135	0.026	0.192593	4.19231	1.36941	52.6697	189.863	256.309	7.44403	0.284584
TP2021071501	Gymnocarpos przewalskii	Caryophyllaceae	shrub	deciduous	0.426	0.005	0.00233333	0.466667	1.14286	0.154033	66.0143	151.482	374.382	16.099	1.09304
TP2021071501	Clematis fruticosa	Ranunculaceae	shrub	deciduous	0.286	0.0435	0.016	0.367816	1.71875	1.2892	80.575	124.108	387.369	18.8137	0.917266
TP2021071501	Asterothamnus centraliasiaticus	Asteraceae	semi-shrub	deciduous	0.192	0.0103333	0.00433333	0.419355	1.38462	0.4259	98.2846	101.745	412.218	15.1842	1.42213
TP2021071501	Sympegma regelii	Amaranthaceae	semi-shrub	perennial	0.5	0.002	0.001	0.5	1	0.0644333	64.4333	155.199	310.62	14.5364	0.61249
TP2021071502	Sympegma regelii	Amaranthaceae	semi-shrub	perennial	0.526	0.002	0.000666667	0.333333	2	0.0765	114.75	87.146	333.243	29.4483	1.19334
TP2021071601	Krascheninnikovia ceratoides	Amaranthaceae	semi-shrub	perennial	0.24	0.00966667	0.003	0.310345	2.22222	0.348667	116.222	86.0421	298.037	27.2185	1.03979
TP2021071601	Salsola abrotanoides	Amaranthaceae	semi-shrub	perennial	1.486	0.019	0.004	0.210526	3.75	0.232933	58.2333	171.723	243.332	19.7501	0.524237
TP2021071601	Reaumuria soongarica	Tamaricaceae	shrub	deciduous	0.432	0.0014	0.0007	0.5	1	0.02754	39.3429	254.176	326.979	18.835	0.44035
TP2021071601	Artemisia rutifolia	Asteraceae	semi-shrub	perennial	0.054	0.00366667	0.00166667	0.454545	1.2	0.328625	197.175	50.7164	403.288	20.841	1.44336
TP2021071602	Reaumuria soongarica	Tamaricaceae	shrub	deciduous	0.342	0.000266667	0.000133333	0.5	1	0.0132333	99.25	100.756	308.798	20.578	0.855845
TP2021071602	Kalidium cuspidatum	Amaranthaceae	shrub	deciduous	1.608	0.0046	0.0011	0.23913	3.18182	0.07744	70.4	142.045	268.467	16.6567	0.303104
TP2021071602	Sympegma regelii	Amaranthaceae	semi-shrub	perennial	0.836	0.00533333	0.00133333	0.25	3	0.0788667	59.15	169.062	267.677	33.1801	1.27468
TP2021071603	Sympegma regelii	Amaranthaceae	semi-shrub	perennial	0.73	0.006	0.00133333	0.222222	3.5	0.187067	140.3	71.2758	294.964	11.2625	0.299139
TP2021071603	Reaumuria soongarica	Tamaricaceae	shrub	deciduous	0.242	0.0004	0.000266667	0.666667	0.5	0.016195	60.7313	164.66	305.062	19.528	0.407444
TP2021071603	Corethrodendron multijugum	Fabaceae	semi-shrub	perennial	0.33	0.034	0.01	0.294118	2.4	1.00437	100.437	99.5652	368.593	30.8755	0.47936
TP2021071603	Asterothamnus centraliasiaticus	Asteraceae	semi-shrub	deciduous	0.162	0.00833333	0.004	0.48	1.08333	0.422067	105.517	94.7718	399.937	20.2096	1.09655
TP2021071603	Tamarix hohenackeri	Tamaricaceae	shrub	deciduous	0.196	0.0001	5e-05	0.5	1	0.017115	342.3	29.2141	291.733	16.712	0.815111
TP2021071603	Zygophyllum xanthoxylon	Zygophyllaceae	shrub	deciduous	0.912	0.0676667	0.0136667	0.20197	3.95122	0.9504	69.5415	143.799	244.069	7.65383	0.573176
TP2021071603	Gymnocarpos przewalskii	Caryophyllaceae	shrub	deciduous	0.618	0.0126667	0.00433333	0.342105	1.92308	0.250133	57.7231	173.241	316.529	13.9125	0.654981
TP2021071603	Kalidium gracile	Amaranthaceae	shrub	deciduous	0.526	0.001	0.0005	0.5	1	0.01636	32.72	305.623	223.729	23.3137	0.655404
TP2021071604	Sympegma regelii	Amaranthaceae	semi-shrub	perennial	0.71	0.00633333	0.002	0.315789	2.16667	0.152267	76.1333	131.349	306.048	21.6862	0.663686
TP2021071604	Reaumuria soongarica	Tamaricaceae	shrub	deciduous	0.246	0.0002	0.000133333	0.666667	0.5	0.01303	97.725	102.328	312.116	18.8734	0.554828
TP2021071701	Tamarix hohenackeri	Tamaricaceae	shrub	deciduous	0.13	0.0001	3e-05	0.3	2.33333	0.0174252	290.42	17.2164	318.474	8.64068	0.425683
TP2021071702	Phragmites australis	Poaceae	herb	perennial	0.184	0.612	0.459	0.75	0.333333	41.99	91.4815	109.312	306.412	11.4921	0.676253
TP2021071702	Tamarix hohenackeri	Tamaricaceae	shrub	deciduous	0.102	0.0001	5e-05	0.5	1	0.017906	179.06	27.9236	292.076	14.2153	0.713126
TP2021071801	Halogeton glomeratus	Amaranthaceae	herb	annual	0.966	0.00575	0.00125	0.217391	3.6	0.208471	166.776	59.9605	199.822	18.0303	1.41037
TP2021071801	Zygophyllum xanthoxylon	Zygophyllaceae	shrub	deciduous	1.192	0.0783333	0.014	0.178723	4.59524	1.07273	76.6238	130.508	206.572	8.47435	0.410532
TP2021071801	Sympegma regelii	Amaranthaceae	semi-shrub	perennial	0.822	0.00766667	0.002	0.26087	2.83333	0.1804	90.2	110.865	250.429	15.455	0.505051
TP2021071801	Reaumuria soongarica	Tamaricaceae	shrub	deciduous	0.43	0.000266667	0.000133333	0.5	1	0.0124167	93.125	107.383	287.491	12.6491	0.442701
TP2021071802	Halogeton glomeratus	Amaranthaceae	herb	annual	0.942	0.006	0.001	0.166667	5	0.1638	163.8	61.0501	192.496	15.7705	1.70056
TP2021071802	Reaumuria soongarica	Tamaricaceae	shrub	deciduous	0.332	0.000133333	6.66667e-05	0.5	1	0.0154067	231.1	43.2713	232.647	12.8736	0.687896
TP2021071803	Lycium ruthenicum	Solanaceae	shrub	deciduous	1.186	0.0186667	0.00433333	0.232143	3.30769	0.219333	50.6154	197.568	291.471	18.975	1.04309
TP2021071803	Phragmites australis	Poaceae	herb	perennial	0.24	1.031	0.623	0.604268	0.654896	43.0967	69.176	144.559	373.206	18.9077	0.831063
TP2021071803	Tamarix hohenackeri	Tamaricaceae	shrub	deciduous	0.126	6.66667e-05	3.33333e-05	0.5	1	0.01078	323.4	30.9215	314.903	15.1791	0.938619
TP2021071902	Tamarix arceuthoides	Tamaricaceae	shrub	deciduous	0.194	0.000266667	0.0002	0.75	0.333333	0.00821333	41.0667	243.506	291.979	7.17949	0.499451
TP2021071903	Alhagi sparsifolia	Fabaceae	semi-shrub	perennial	0.48	0.0383333	0.0116667	0.304348	2.28571	0.935233	80.1629	124.746	347.046	18.8414	1.05261
TP2021071903	Apocynum pictum	Apocynaceae	semi-shrub	perennial	0.428	0.302	0.0995	0.32947	2.03518	6.9691	70.0412	142.773	354.537	12.8338	0.763457
TP2021071903	Phragmites australis	Poaceae	herb	perennial	0.402	3.176	1.339	0.421599	1.37192	81.515	60.8775	164.264	356.202	23.0141	0.891321
TP2021071903	Tamarix taklamakanensis	Tamaricaceae	shrub	deciduous	0.14	0.000266667	0.0002	0.75	0.333333	0.0136757	68.3784	146.245	297.705	11.0449	0.428242
TP2021071904	Cynanchum kaschgaricum	Apocynaceae	herb	perennial	0.608	0.0776667	0.0183333	0.236052	3.23636	1.61013	87.8255	113.862	318.585	14.6277	0.921398
TP2021071904	Alhagi sparsifolia	Fabaceae	semi-shrub	perennial	0.466	0.052	0.0163333	0.314103	2.18367	1.1878	72.7224	137.509	411.675	16.1015	0.767248
TP2021071904	Phragmites australis	Poaceae	herb	perennial	0.302	0.686	0.341	0.497085	1.01173	28.8587	84.6295	118.162	358.354	10.9711	0.593921
TP2021072001	Corispermum lehmannianum	Amaranthaceae	herb	annual	0.434	0.0343333	0.008	0.23301	3.29167	0.8415	105.188	95.0683	290.576	10.6963	1.33694
TP2021072001	Artemisia stricta	Asteraceae	herb	perennial	0.162	0.00433333	0.00133333	0.307692	2.25	0.243033	182.275	54.8622	291.845	19.5446	3.00359
TP2021072001	Krascheninnikovia ceratoides	Amaranthaceae	semi-shrub	perennial	0.228	0.00733333	0.00333333	0.454545	1.2	0.293467	88.04	113.585	274.217	17.3725	1.34279
TP2021072001	Bassia dasyphylla	Amaranthaceae	herb	annual	0.658	0.0103333	0.002	0.193548	4.16667	0.2813	140.65	71.0985	212.052	15.2202	1.22207
TP2021072001	Artemisia rutifolia	Asteraceae	semi-shrub	perennial	0.154	0.00266667	0.00133333	0.5	1	0.268867	201.65	49.5909	356.885	19.6217	3.85063
TP2021072001	Reaumuria soongarica	Tamaricaceae	shrub	deciduous	0.37	0.0006	0.0004	0.666667	0.5	0.02046	51.15	195.503	308.981	17.9234	1.04846
TP2021072002	Saussurea arenaria	Asteraceae	herb	perennial	0.284	0.0406667	0.00966667	0.237705	3.2069	1.10997	114.824	87.0897	378.408	18.3379	1.51398
TP2021072002	Iris loczyi	Iridaceae	herb	perennial	0.468	0.611	0.194	0.317512	2.14948	14.9838	77.2358	129.474	371.571	16.1487	0.842298
TP2021072002	Stipa subsessiliflora	Poaceae	herb	perennial	0.284	0.00666667	0.00333333	0.5	1	0.291567	87.47	114.325	371.083	16.1464	0.832899
TP2021072002	Poa attenuata	Poaceae	herb	perennial	0.292	0.00733333	0.00233333	0.318182	2.14286	0.219467	94.0571	106.318	397.025	25.6752	1.28887
TP2021072002	Caragana polourensis	Fabaceae	shrub	deciduous	0.164	0.0018	0.001	0.555556	0.8	0.1153	115.3	86.7303	403.665	28.2958	1.18676
TP2021072002	Artemisia frigida	Asteraceae	semi-shrub	perennial	0.262	0.001	0.000666667	0.666667	0.5	0.0851667	127.75	78.2779	336.482	19.5878	1.78029
TP2021072101	Reaumuria soongarica	Tamaricaceae	shrub	deciduous	0.334	0.000466667	0.000266667	0.571429	0.75	0.0191933	71.975	138.937	344.687	19.3503	1.31082
TP2021072101	Salsola abrotanoides	Amaranthaceae	semi-shrub	perennial	1.742	0.0263333	0.004	0.151899	5.58333	0.2928	73.2	136.612	237.07	21.0855	1.35066
TP2021072101	Krascheninnikovia ceratoides	Amaranthaceae	semi-shrub	perennial	0.312	0.00366667	0.00133333	0.363636	1.75	0.2237	167.775	59.6036	324.99	22.9756	1.82651
TP2021072101	Artemisia rutifolia	Asteraceae	semi-shrub	perennial	0.168	0.006	0.00233333	0.388889	1.57143	0.296433	127.043	78.7136	391.438	22.7152	2.54617
TP2021072102	Artemisia frigida	Asteraceae	semi-shrub	perennial	0.282	0.00133333	0.000666667	0.5	1	0.0826207	123.931	80.69	365.872	17.9865	1.43848
TP2021072102	Caragana polourensis	Fabaceae	shrub	deciduous	0.164	0.0022	0.0012	0.545455	0.833333	0.1466	122.167	81.8554	365.609	29.2986	1.30374
TP2021072102	Pedicularis alaschanica	Orobanchaceae	herb	perennial	0.218	0.0585	0.017	0.290598	2.44118	1.9409	114.171	87.5882	330.619	16.1151	1.82433
TP2021072102	Stipa bungeana	Poaceae	herb	perennial	0.344	0.00966667	0.005	0.517241	0.933333	0.395	79	126.582	350.524	14.6812	0.706743
TP2021072102	Reaumuria kaschgarica	Tamaricaceae	semi-shrub	perennial	0.384	0.0026	0.0012	0.461538	1.16667	0.08664	72.2	138.504	348.532	12.6772	0.723271
TP2021072102	Corethrodendron multijugum	Fabaceae	semi-shrub	perennial	0.308	0.0166667	0.00566667	0.34	1.94118	0.550467	97.1412	102.943	384.743	29.7158	1.24559
TP2021072102	Iris loczyi	Iridaceae	herb	perennial	0.45	0.346	0.118	0.34104	1.9322	8.6248	73.0915	136.815	388.275	16.4672	0.79761
TP2021072102	Androsace tapete	Primulaceae	herb	perennial	0.532	0.0017	0.0005	0.294118	2.4	0.07625	152.5	65.5738	349.214	11.4676	0.729485
TP2021072103	Halogeton glomeratus	Amaranthaceae	herb	annual	0.72	0.0126667	0.00233333	0.184211	4.42857	0.179233	76.8143	130.184	207.185	10.4473	1.84091
TP2021072103	Artemisia rutifolia	Asteraceae	semi-shrub	perennial	0.16	0.000666667	0.000333333	0.5	1	0.0464667	139.4	71.736	390.186	18.8633	3.3476
TP2021072103	Sympegma regelii	Amaranthaceae	semi-shrub	perennial	1.242	0.0213333	0.00433333	0.203125	3.92308	0.333767	77.0231	129.831	267.299	12.1553	0.731853
TP2021072103	Reaumuria soongarica	Tamaricaceae	shrub	deciduous	0.45	0.0002	0.000133333	0.666667	0.5	0.00808667	60.65	164.88	248.733	9.93311	0.609015
TP2021072103	Artemisia stricta	Asteraceae	herb	perennial	0.256	0.00366667	0.003	0.818182	0.222222	0.155633	51.8778	192.761	372.384	23.0414	1.36927
TP2021072201	Phragmites australis	Poaceae	herb	perennial	0.41	0.982	0.45	0.458248	1.18222	26.924	59.8311	167.137	345.478	16.9365	0.845677
TP2021072201	Alhagi sparsifolia	Fabaceae	semi-shrub	perennial	0.464	0.086	0.0266667	0.310078	2.225	2.128	79.8	125.313	384.831	16.2069	0.705123
TP2021072201	Tamarix hohenackeri	Tamaricaceae	shrub	deciduous	0.16	0.0002	0.00018	0.9	0.111111	0.01712	95.1111	105.14	351.166	10.3667	0.466738
TP2021072202	Populus euphratica	Salicaceae	tree	deciduous	0.472	0.308	0.1295	0.420455	1.37838	6.6853	51.6239	193.709	366.605	10.3765	1.02028
TP2021072202	Phragmites australis	Poaceae	herb	perennial	0.308	0.783	0.383	0.489144	1.04439	25.3936	66.3018	150.825	321.846	14.3218	0.665181
TP2021072202	Tamarix hohenackeri	Tamaricaceae	shrub	deciduous	0.18	0.000133333	0.000113333	0.85	0.176471	0.0152533	134.588	74.3007	340.575	12.464	0.636523
TP2021072301	Phragmites australis	Poaceae	herb	perennial	0.252	0.817	0.329	0.402693	1.48328	32.5872	99.0492	100.96	375.834	18.1344	0.635545
TP2021072301	Tamarix hispida	Tamaricaceae	shrub	deciduous	0.274	0.000466667	0.0002	0.428571	1.33333	0.01442	72.1	138.696	335.516	14.1793	0.757523
TP2021072301	Tamarix hohenackeri	Tamaricaceae	shrub	deciduous	0.168	0.000266667	0.000133333	0.5	1	0.0185	138.75	72.0721	297.187	17.8425	1.17554
TP2021072302	Nitraria tangutorum	Nitrariaceae	shrub	deciduous	1.006	0.17	0.0356667	0.209804	3.76636	2.22903	62.4963	160.01	333.151	21.0174	0.722531
TP2021072302	Tamarix hohenackeri	Tamaricaceae	shrub	deciduous	0.216	0.000266667	0.0002	0.75	0.333333	0.0214419	107.209	93.2755	362.754	11.215	0.627255
TP2021072303	Halogeton glomeratus	Amaranthaceae	herb	annual	0.944	0.0106667	0.00166667	0.15625	5.4	0.158167	94.9	105.374	244.018	15.2639	3.1725
TP2021072303	Reaumuria soongarica	Tamaricaceae	shrub	deciduous	0.226	0.000133333	0.000106667	0.8	0.25	0.0170833	160.156	62.439	285.262	12.7617	0.929607
TP2021072401	Reaumuria soongarica	Tamaricaceae	shrub	deciduous	0.36	0.000466667	0.000333333	0.714286	0.4	0.0110533	33.16	301.568	316.733	13.6872	0.831454
TP2021072402	Alhagi sparsifolia	Fabaceae	semi-shrub	perennial	0.438	0.1	0.0283333	0.283333	2.52941	2.43467	85.9294	116.375	370.143	19.6543	1.12315
TP2021072402	Tamarix hispida	Tamaricaceae	shrub	deciduous	0.12	0.0002	0.000133333	0.666667	0.5	0.01704	127.8	78.2473	339.15	20.4939	1.65743
TP2021072402	Phragmites australis	Poaceae	herb	perennial	0.252	1.943	0.908	0.467319	1.13987	72.4815	79.8254	125.273	417.881	21	1.4283
TP2021072403	Halogeton arachnoideus	Amaranthaceae	herb	annual	1.23	0.0176667	0.00166667	0.0943396	9.6	0.213233	127.94	78.1616	278.691	24.9197	2.37023
TP2021072403	Zygophyllum rosowii	Zygophyllaceae	herb	perennial	1.102	0.148333	0.015	0.101124	8.88889	1.5148	100.987	99.023	325.687	23.9083	1.94405
TP2021072403	Halogeton glomeratus	Amaranthaceae	herb	annual	1.002	0.00833333	0.00166667	0.2	4	0.194067	116.44	85.8811	279.933	15.5421	0.915948
TP2021072501	Salsola collina	Amaranthaceae	herb	annual	1.12	0.031	0.00333333	0.107527	8.3	0.466633	139.99	71.4337	258.678	18.4099	0.70933
TP2021072501	Halogeton glomeratus	Amaranthaceae	herb	annual	1.412	0.036	0.00266667	0.0740741	12.5	0.429233	160.963	62.1263	248.51	16.5489	0.650255
TP2021072501	Zygophyllum rosowii	Zygophyllaceae	herb	perennial	1.08	0.055	0.00566667	0.10303	8.70588	0.712333	125.706	79.5508	285.891	20.6093	0.791921
TP2021072501	Salsola laricifolia	Amaranthaceae	shrub	deciduous	1.108	0.0106667	0.00133333	0.125	7	0.2306	172.95	57.8202	310.08	25.326	1.63756
TP2021072501	Bassia dasyphylla	Amaranthaceae	herb	annual	1.376	0.0326667	0.00266667	0.0816327	11.25	0.503333	188.75	52.9801	252.328	21.6364	1.28936
TP2021072501	Corispermum lehmannianum	Amaranthaceae	herb	annual	0.502	0.0413333	0.00666667	0.16129	5.2	0.931433	139.715	71.5743	297.513	21.633	0.73635
TP2021072501	Reaumuria soongarica	Tamaricaceae	shrub	deciduous	0.352	0.000266667	0.00014	0.525	0.904762	0.011	78.5714	127.273	366.329	23.2631	1.02416
TP2021072601	Halogeton arachnoideus	Amaranthaceae	herb	annual	1.69	0.023	0.00166667	0.0724638	12.8	0.310267	186.16	53.7172	258.861	22.4594	1.97462
TP2021072601	Bassia dasyphylla	Amaranthaceae	herb	annual	1.588	0.0453333	0.004	0.0882353	10.3333	0.6419	160.475	62.315	262.07	22.0938	1.16151
TP2021072601	Halogeton glomeratus	Amaranthaceae	herb	annual	1.436	0.027	0.002	0.0740741	12.5	0.366367	183.183	54.5901	244.188	23.8186	1.34811
TP2021072601	Salsola collina	Amaranthaceae	herb	annual	1.476	0.0523333	0.00533333	0.101911	8.8125	0.6512	122.1	81.9001	237.8	24.8649	1.65508
TP2021072602	Salsola collina	Amaranthaceae	herb	annual	1.828	0.140667	0.012	0.0853081	10.7222	1.1573	96.4417	103.69	238.312	21.0195	1.98103
TP2021072602	Alhagi sparsifolia	Fabaceae	semi-shrub	perennial	0.468	0.094	0.0246667	0.262411	2.81081	2.46317	99.8581	100.142	373.066	18.7913	0.481918
TP2021072701	Halogeton glomeratus	Amaranthaceae	herb	annual	1.412	0.016	0.00133333	0.0833333	11	0.2848	213.6	46.8165	214.441	15.8496	1.33739
TP2021072701	Reaumuria soongarica	Tamaricaceae	shrub	deciduous	0.246	0.000333333	0.0002	0.6	0.666667	0.01378	68.9	145.138	336.2	23.9758	1.38027
TP2021072701	Salsola collina	Amaranthaceae	herb	annual	1.374	0.056	0.00566667	0.10119	8.88235	0.5962	105.212	95.0464	230.056	16.4762	1.14429
TP2021072702	Halogeton glomeratus	Amaranthaceae	herb	annual	0.928	0.0166667	0.002	0.12	7.33333	0.283133	141.567	70.6381	219.798	18.0481	1.29158
TP2021072703	Bassia dasyphylla	Amaranthaceae	herb	annual	1.28	0.046	0.00466667	0.101449	8.85714	0.7709	165.193	60.5353	292.605	29.1288	2.40094
TP2021072703	Halogeton glomeratus	Amaranthaceae	herb	annual	1.326	0.0316667	0.003	0.0947368	9.55556	0.407533	135.844	73.6136	212.471	20.2913	1.66923
TP2021072703	Halogeton arachnoideus	Amaranthaceae	herb	annual	1.434	0.0253333	0.00233333	0.0921053	9.85714	0.296	126.857	78.8288	240.315	22.219	1.38229
TP2021072703	Reaumuria soongarica	Tamaricaceae	shrub	deciduous	0.34	0.0004	0.000266667	0.666667	0.5	0.0171667	64.375	155.34	328.125	21.8038	0.976015
TP2021072901	Kobresia tibetica	Cyperaceae	herb	perennial	0.254	0.0286667	0.014	0.488372	1.04762	1.5084	107.743	92.8136	353.625	15.9328	0.895079
TP2021072901	Astragalus polycladus	Fabaceae	herb	perennial	0.342	0.0064	0.0016	0.25	3	0.2846	177.875	56.2193	341.133	26.6207	1.5268
TP2021072901	Triglochin maritima	Juncaginaceae	herb	perennial	1.708	0.288667	0.05	0.17321	4.77333	3.19713	63.9427	156.39	370.591	22.17	1.28414
TP2021072901	Carex melanocephala	Cyperaceae	herb	perennial	0.256	0.07	0.047	0.671429	0.489362	2.8918	61.5277	162.529	408.536	21.436	1.05649
TP2021072901	Primula nutans	Primulaceae	herb	perennial	0.57	0.098	0.0153333	0.156463	5.3913	2.1162	138.013	72.4569	365.479	9.1203	0.682721
TP2021072901	Lysimachia maritima	Primulaceae	herb	perennial	0.346	0.004	0.001	0.25	3	0.237433	237.433	42.1171	379.57	10.7228	0.899366
TP2021072901	Schoenoplectus juncoides	Cyperaceae	herb	perennial	1.314	0.112	0.04	0.357143	1.8	2.0223	50.5575	197.795	374.239	16.7085	0.697082
TP2021072902	Christolea crassifolia	Brassicaceae	herb	perennial	0.478	0.0693333	0.011	0.158654	5.30303	1.4181	128.918	77.5686	327.5	43.0594	2.69521
TP2021072902	Leiospora exscapa	Brassicaceae	herb	perennial	0.97	0.299	0.0485	0.162207	5.16495	4.03925	83.2835	120.072	337.19	38.4799	1.987
TP2021072902	Ajania tibetica	Asteraceae	herb	perennial	0.708	0.0113333	0.00166667	0.147059	5.8	0.6052	363.12	27.5391	391.728	30.6895	1.87964
TP2021072902	Alyssum canescens	Brassicaceae	semi-shrub	perennial	0.408	0.006	0.00166667	0.277778	2.6	0.2147	128.82	77.6277	380.415	44.2022	3.04245
TP2021072902	Astragalus pamirensis	Fabaceae	herb	perennial	0.182	0.000533333	0.000266667	0.5	1	0.01637	61.3875	162.9	404.481	46.9629	2.52114
TP2021072903	Pleurospermum lindleyanum	Apiaceae	herb	perennial	0.238	0.013	0.00266667	0.205128	3.875	0.5716	214.35	46.6527	400.906	30.222	3.42718
TP2021072903	Astragalus pamirensis	Fabaceae	herb	perennial	0.246	0.000933333	0.000333333	0.357143	1.8	0.0554	166.2	60.1685	394.231	43.6471	2.36242
TP2021072903	Krascheninnikovia compacta	Amaranthaceae	semi-shrub	perennial	0.294	0.003	0.00133333	0.444444	1.25	0.236567	177.425	56.3618	358.674	27.4186	1.31427
TP2021072903	Potentilla bifurca	Rosaceae	herb	perennial	0.16	0.0035	0.002	0.571429	0.75	0.2898	144.9	69.0131	393.837	23.4667	1.77684
TP2021072903	Poa parvissima	Poaceae	herb	perennial	0.184	0.00266667	0.002	0.75	0.333333	0.158333	79.1667	126.316	393.816	29.2177	1.70547
TP2021072904	Salsola laricifolia	Amaranthaceae	shrub	deciduous	1.08	0.013	0.00233333	0.179487	4.57143	0.209167	89.6429	111.554	282.275	40.3705	1.85872
TP2021072904	Orostachys thyrsiflora	Crassulaceae	herb	perennial	2.574	0.0466667	0.00433333	0.0928571	9.76923	0.438633	101.223	98.7917	332.265	11.2723	1.17513
TP2021072904	Stipa roborowskyi	Poaceae	herb	perennial	0.318	0.00366667	0.002	0.545455	0.833333	0.1958	97.9	102.145	390.706	24.8281	1.66274
TP2021072904	Artemisia frigida	Asteraceae	semi-shrub	perennial	0.184	0.0008	0.0006	0.75	0.333333	0.12686	211.433	47.2962	404.306	34.1009	4.54374
TP2021072905	Astragalus polycladus	Fabaceae	herb	perennial	0.19	0.00375	0.00075	0.2	4	0.288325	384.433	26.0123	410.256	45.6331	1.87674
TP2021072905	Poa sibirica	Poaceae	herb	perennial	0.15	0.00433333	0.00166667	0.384615	1.6	0.308	184.8	54.1126	390.424	29.2082	1.90172
TP2021072905	Caragana polourensis	Fabaceae	shrub	deciduous	0.028	0.008	0.0007	0.0875	10.4286	0.149783	213.975	46.7344	392.5	35.5117	1.18038
TP2021072905	Stipa	Poaceae	herb	perennial	0.388	0.009	0.00733333	0.814815	0.227273	0.622567	84.8955	117.792	354.9	19.4425	1.1653
TP2021072905	Aster altaicus	Asteraceae	herb	perennial	0.204	0.00966667	0.00333333	0.344828	1.9	0.4737	142.11	70.368	335.219	28.3055	2.09641
TP2021072905	Artemisia frigida	Asteraceae	semi-shrub	perennial	0.24	0.00175	0.0005	0.285714	2.5	0.1876	375.2	26.6525	377.788	24.6719	2.12725
TP2021072905	Iris loczyi	Iridaceae	herb	perennial	0.568	0.49	0.173	0.353061	1.83237	9.42225	54.4639	183.608	374.954	27.3139	1.2503
TP2021072905	Achnatherum splendens	Poaceae	herb	perennial	0.228	0.118	0.049	0.415254	1.40816	2.567	52.3878	190.884	362.237	18.4958	1.34811
TP2021072906	Bassia dasyphylla	Amaranthaceae	herb	annual	0.944	0.0123333	0.002	0.162162	5.16667	0.266533	133.267	75.0375	245.287	21.1628	1.7821
TP2021072906	Zygophyllum loczyi	Zygophyllaceae	herb	annual	1.122	0.099	0.011	0.111111	8	1.1196	101.782	98.2494	268.111	23.8953	1.9677
TP2021072906	Salsola laricifolia	Amaranthaceae	shrub	deciduous	1.14	0.0163333	0.00266667	0.163265	5.125	0.319167	119.688	83.5509	239.014	23.3434	1.10004
TP2021072907	Zygophyllum rosowii	Zygophyllaceae	herb	perennial	1.024	0.048	0.006	0.125	7	0.7267	121.117	82.565	240.651	18.9904	1.49166
TP2021072907	Peganum multisectum	Nitrariaceae	herb	perennial	0.736	0.076	0.0196667	0.258772	2.86441	1.70957	86.9274	115.039	303.428	16.6357	0.827068
TP2021072907	Halogeton glomeratus	Amaranthaceae	herb	annual	1.02	0.017	0.00266667	0.156863	5.375	0.3078	115.425	86.6363	196.748	12.9452	0.747549
TP2021072907	Salsola collina	Amaranthaceae	herb	annual	0.704	0.0103333	0.00266667	0.258065	2.875	0.236467	88.675	112.771	222.589	13.3079	0.836071
TP2021072907	Nitraria sphaerocarpa	Nitrariaceae	shrub	deciduous	0.354	0.0363333	0.0133333	0.366972	1.725	0.956684	71.7513	139.37	310.388	23.9787	0.921355
TP2021072907	Salsola tragus	Amaranthaceae	herb	annual	0.682	0.0166667	0.00333333	0.2	4	0.264	79.2	126.263	257.67	12.9759	1.24701
TP2021072907	Reaumuria soongarica	Tamaricaceae	shrub	deciduous	0.332	0.000466667	0.0002	0.428571	1.33333	0.019	95	105.263	312.097	14.4613	0.598068
TP2021073101	Halogeton glomeratus	Amaranthaceae	herb	annual	1.268	0.0113333	0.00166667	0.147059	5.8	0.158	94.8	105.485	214.5	16.6681	1.40882
TP2021073101	Nitraria sphaerocarpa	Nitrariaceae	shrub	deciduous	0.834	0.054	0.0166667	0.308642	2.24	0.822367	49.342	202.667	318.699	19.5495	0.652135
TP2021073102	Halogeton glomeratus	Amaranthaceae	herb	annual	1.36	0.012	0.002	0.166667	5	0.224367	112.183	89.1398	213.236	17.5653	0.951432
TP2021073102	Sympegma regelii	Amaranthaceae	semi-shrub	perennial	1.064	0.00766667	0.00233333	0.304348	2.28571	0.1789	76.6714	130.427	230.069	12.4989	0.3199
TP2021080201	Leymus arjinshanicus	Poaceae	herb	perennial	0.268	0.143	0.05	0.34965	1.86	2.6853	53.706	186.199	336.558	12.2568	0.884419
TP2021080201	Artemisia frigida	Asteraceae	semi-shrub	perennial	0.318	0.000666667	0.000333333	0.5	1	0.3234	370.2	27.0124	405.122	17.5508	1.55267
TP2021080201	Krascheninnikovia ceratoides	Amaranthaceae	semi-shrub	perennial	0.42	0.0106667	0.004	0.375	1.66667	0.436733	109.183	91.5891	297.878	19.1185	1.1087
TP2021080201	Stipa caucasica subsp. Glareosa	Poaceae	herb	perennial	0.328	0.00833333	0.00366667	0.44	1.27273	0.4961	135.3	73.9098	361.941	13.4928	0.797808
TP2021080201	Carex nivalis	Cyperaceae	herb	perennial	0.194	0.011	0.006	0.545455	0.833333	0.593042	98.8403	101.173	355.099	22.8687	1.01496
TP2021080201	Atriplex centralasiatica	Amaranthaceae	herb	annual	0.356	0.2085	0.035	0.167866	4.95714	5.43955	155.416	64.3436	245.143	28.1443	2.10711
TP2021080202	Myricaria elegans	Tamaricaceae	shrub	deciduous	0.352	0.0223333	0.009	0.402985	1.48148	0.852533	94.7259	105.568	348.118	16.7354	1.14795
TP2021080202	Krascheninnikovia ceratoides	Amaranthaceae	semi-shrub	perennial	0.398	0.011	0.00333333	0.30303	2.3	0.4438	133.14	75.1089	292.292	29.661	1.71884
TP2021080202	Zygophyllum rosowii	Zygophyllaceae	herb	perennial	1.246	0.103667	0.00966667	0.0932476	9.72414	1.19367	123.483	80.983	284.284	24.9747	1.66507
TP2021080203	Carex nivalis	Cyperaceae	herb	perennial	0.198	0.026	0.012	0.461538	1.16667	1.42983	119.153	83.9259	340.009	22.9603	0.922674
TP2021080203	Artemisia frigida	Asteraceae	semi-shrub	perennial	0.218	0.002	0.000666667	0.333333	2	0.252	378	26.455	350.435	21.0797	1.41926
TP2021080203	Krascheninnikovia compacta	Amaranthaceae	semi-shrub	perennial	0.4	0.0210345	0.00758621	0.360656	1.77273	0.706	93.0636	107.453	278.817	22.4304	1.7134
TP2021080203	Salsola laricifolia	Amaranthaceae	shrub	deciduous	1.354	0.016	0.00266667	0.166667	5	0.276433	103.662	96.4669	303.712	29.9015	1.89471
TP2021080203	Potentilla bifurca	Rosaceae	herb	perennial	0.288	0.00933333	0.004	0.428571	1.33333	0.5077	126.925	78.7867	388.785	22.9916	1.73662
TP2021080203	Leymus arjinshanicus	Poaceae	herb	perennial	0.292	0.174	0.064	0.367816	1.71875	3.6505	57.0391	175.318	405.552	23.3445	1.31135
TP2021080203	Stipa caucasica subsp. Glareosa	Poaceae	herb	perennial	0.288	0.00833333	0.00466667	0.56	0.785714	0.4131	88.5214	112.967	396.141	13.2233	0.542185
TP2021080203	Oxytropis stracheyana	Fabaceae	herb	perennial	0.41	0.0024	0.0008	0.333333	2	0.1464	183	54.6448	362.854	26.4962	1.65572
TP2021080203	Clematis orientalis	Ranunculaceae	herb	perennial	0.366	0.1115	0.036	0.32287	2.09722	3.26655	90.7375	110.208	385.044	26.6096	2.19004
TP2021080204	Convolvulus fruticosus	Convolvulaceae	shrub	deciduous	0.384	0.039	0.0153333	0.393162	1.54348	1.24777	81.3761	122.886	392.003	17.8519	1.32633
TP2021080204	Artemisia desertorum	Asteraceae	herb	perennial	0.43	0.007	0.0025	0.357143	1.8	0.451667	180.667	55.3506	441.745	18.2399	1.42859
TP2021080204	Halogeton glomeratus	Amaranthaceae	herb	annual	1.26	0.0117241	0.00137931	0.117647	7.5	0.219793	159.35	62.7549	227.931	12.5399	0.867174
